# Supplementary material for: An intermolecular C–H functionalization method for the synthesis of 3-hydroxy-2-oxindoles
Source: Royal Society of Chemistry journal article supplement (doi:10.1039/c4ob01643b), 2014-01-01

**Supporting Information for**

**An Intermolecular Functionalization Method for the**

**Synthesis of 3-Hydroxy-2-oxindoles**

Jinsen Chen, Chao Song, Pei Chen, and Jin Zhu\*

*Department of Polymer Science and Engineering, School of Chemistry and Chemical Engineering, State Key Laboratory of Coordination Chemistry, Nanjing National Laboratory of Microstructures, Nanjing University, Nanjing 210093, China*

\*Corresponding author. Email: jinz@nju.edu.cn; Phone: +86-25-83686291; Fax: +86-25-83317761.

## Table of Contents

|                                                                                            |         |
|--------------------------------------------------------------------------------------------|---------|
| 1. General Methods .....                                                                   | S2      |
| 2. Synthesis and Characterization of 3-Hydroxy-2-oxindoles .....                           | S2-S7   |
| 3. Synthesis of Dimeric Product of 3-Hydroxy-2-oxindoles .....                             | S8      |
| 4. Halogen Removal from 3-Hydroxy-2-oxindoles under Raney Ni/H <sub>2</sub> Condition..... | S9      |
| 5. Synthesis and Characterization of t3 and t4 .....                                       | S10     |
| 6. Reference .....                                                                         | S11     |
| 7. <sup>1</sup> H and <sup>13</sup> C NMR Spectra for the Compounds .....                  | S11-S65 |

## 1. General Methods

### 1) Materials

All reagents and solvents were purchased from commercial sources and used without further purification unless otherwise noted. MeOH was freshly distilled over Na before use. Raney Ni was purchased from TCI.  $^1\text{H}$  and  $^{13}\text{C}$  NMR spectra were recorded in  $\text{CDCl}_3$ , or  $\text{DMSO}-d_6$  on a Bruker AVANCE 400 MHz or 500 MHz spectrometer. The following notations were used: s – singlet, d – doublet, t – triplet, q – quartet, m – multiplet, dd – doublet of doublet, dt – doublet of triplet, td – triplet of doublet, ddd – doublet of doublet of doublet. High-resolution MS (HRMS) spectra were obtained on a Waters Micromass GCT Premier or a Thermo Fisher Scientific LTQ FT Ultra facility. The method for the synthesis of C-H functionalization products (**1a-1w**) as substrate was described in our previous manuscript.<sup>S1</sup>

### 2. Synthesis and Characterization of 3-Hydroxy-2-oxindoles

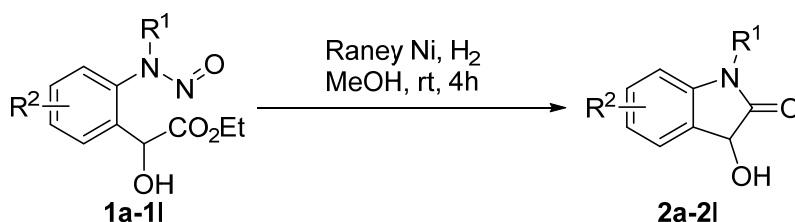

#### General procedure for the synthesis of 3-hydroxy-2-oxindoles under Raney Ni/ $\text{H}_2$ condition:

To a 25 mL Schlenk flask were charged with the C-H functionalization product (for example, **1a**, 47.6 mg, 0.2 mmol) and a slurry of Raney nickel (240 mg, 4 mmol). The Schlenk flask was sealed with a rubber septum and filled with hydrogen by 5 evacuation/backfill cycles, and dry MeOH (2 mL) was then added. The reaction mixture was stirred vigorously. To the flask was then attached a hydrogen balloon as the hydrogen source. The reaction was allowed to proceed at room temperature (rt) for 4 h. The solution was then filtered by cannula under Ar. The solvent was removed in vacuo to directly yield the product unless otherwise noted (recrystallization from EtOAc).

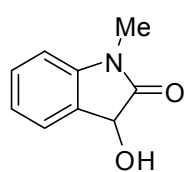

**3-Hydroxy-1-methylindolin-2-one (2a):** The title compound was obtained as a white powder in 95% yield.  $^1\text{H}$  NMR (400 MHz,  $\text{CDCl}_3$ )  $\delta$  7.47 (d,  $J$  = 7.3 Hz, 1H), 7.34 (t,  $J$  = 7.7 Hz, 1H), 7.11 (t,  $J$  = 7.5 Hz, 1H), 6.83 (d,  $J$  = 7.8 Hz, 1H), 5.10 (s, 1H), 3.19 (s, 3H).  $^{13}\text{C}$  NMR (101 MHz,  $\text{CDCl}_3$ )  $\delta$  177.38, 144.00, 129.98, 127.19, 125.32, 123.47, 108.68, 70.03, 26.46. HRMS (EI) Calcd. for  $\text{C}_9\text{H}_9\text{NO}_2$ :  $[\text{M}]^+$ , 163.0633. Found:  $m/z$  163.0636.

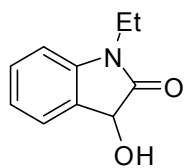

**1-Ethyl-3-hydroxyindolin-2-one (2b):** The title compound was obtained as a white powder in 95% yield.  $^1\text{H}$  NMR (400 MHz,  $\text{CDCl}_3$ )  $\delta$  7.47 (d,  $J$  = 7.3 Hz, 1H), 7.33 (t,  $J$  = 7.7 Hz, 1H), 7.10 (t,  $J$  = 7.5 Hz, 1H), 6.86 (d,  $J$  = 7.9 Hz, 1H), 5.07 (s, 1H), 3.83 – 3.71 (m, 2H), 1.28 (t,  $J$  = 7.2 Hz, 3H).  $^{13}\text{C}$  NMR (101 MHz,  $\text{CDCl}_3$ )  $\delta$  177.17, 143.05, 129.85, 127.56, 125.53, 123.25, 108.79, 70.04, 35.02, 12.72. HRMS (EI) Calcd. for  $\text{C}_{10}\text{H}_{11}\text{NO}_2$ :  $[\text{M}]^+$ , 177.0790. Found:  $m/z$  177.0794.

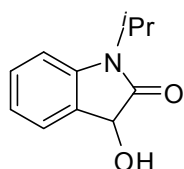

**3-Hydroxy-1-isopropylindolin-2-one (2c):** The title compound was obtained as a white powder in 65% yield.  $^1\text{H}$  NMR (400 MHz,  $\text{CDCl}_3$ )  $\delta$  7.48 (d,  $J$  = 7.3 Hz, 1H), 7.30 (t,  $J$  = 7.7 Hz, 1H), 7.08 (t,  $J$  = 7.5 Hz, 1H), 6.99 (d,  $J$  = 7.9 Hz, 1H), 5.04 (s, 1H), 4.57 (dt,  $J$  = 14.1, 7.0 Hz, 1H), 4.17 (s, 1H), 1.48 (dd,  $J$  = 7.0, 2.8 Hz, 6H).  $^{13}\text{C}$  NMR (101 MHz,  $\text{CDCl}_3$ )  $\delta$  177.05, 142.67, 129.66, 127.69, 125.59, 122.87, 110.36, 69.99, 44.26, 19.58, 19.33. HRMS (EI) Calcd. for  $\text{C}_{11}\text{H}_{13}\text{NO}_2$ :  $[\text{M}]^+$ , 191.0946. Found:  $m/z$  191.0948.

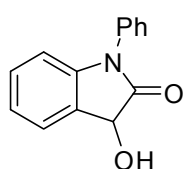

**3-Hydroxy-1-phenylindolin-2-one (2d):** The title compound was obtained as a white powder in 78% yield.  $^1\text{H}$  NMR (400 MHz,  $\text{CDCl}_3$ )  $\delta$  7.53 (t,  $J$  = 7.8 Hz, 3H), 7.42 (td,  $J$  = 7.5, 1.2 Hz, 3H), 7.29 – 7.21 (m, 1H), 7.13 (t,  $J$  = 7.5 Hz, 1H), 6.79 (d,  $J$  = 7.9 Hz, 1H), 5.29 (s, 1H).  $^{13}\text{C}$  NMR (101 MHz,  $\text{CDCl}_3$ )  $\delta$  176.89, 144.07, 134.09, 129.92, 129.85, 128.56, 126.97, 126.61, 125.69, 123.89, 109.97, 69.98. HRMS (EI) Calcd. for  $\text{C}_{14}\text{H}_{11}\text{NO}_2$ :  $[\text{M}]^+$ , 225.0790. Found:  $m/z$  225.0792.

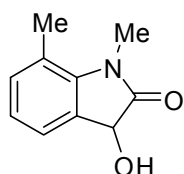

**3-Hydroxy-1,7-dimethylindolin-2-one (2e):** The title compound was obtained as a slightly grayish white powder in 98% yield.  $^1\text{H}$  NMR (400 MHz,  $\text{CDCl}_3$ )  $\delta$  7.30 (d,  $J$  = 7.2 Hz, 1H), 7.07 (d,  $J$  = 7.7 Hz, 1H), 6.99 (t,  $J$  = 7.5 Hz, 1H), 3.47 (s, 3H), 3.33 (s, 1H), 2.55 (s, 3H).  $^{13}\text{C}$  NMR (101 MHz, DMSO)  $\delta$  176.61, 141.21, 132.54, 129.18, 122.39, 122.15, 119.61, 68.29, 28.81, 18.39. HRMS (EI) Calcd. for  $\text{C}_{10}\text{H}_{11}\text{NO}_2$ :  $[\text{M}]^+$ , 177.0790. Found:  $m/z$  177.0792.

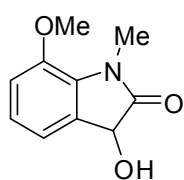

**3-Hydroxy-7-methoxy-1-methylindolin-2-one (2f):** The title compound was obtained as a slightly grayish white powder in 87% yield.  $^1\text{H}$  NMR (400 MHz,  $\text{CDCl}_3$ )  $\delta$  7.09 (d,  $J$  = 7.2 Hz, 1H), 7.05 (t,  $J$  = 7.7 Hz, 1H), 6.91 (d,  $J$  = 7.8 Hz, 1H), 5.02 (s, 1H), 3.86 (s, 3H), 3.45 (s, 3H).  $^{13}\text{C}$  NMR (101 MHz, DMSO)  $\delta$  175.25, 144.74, 130.93, 130.13, 123.00, 117.34, 113.74, 68.75, 56.34, 28.94. HRMS (EI) Calcd. for  $\text{C}_{10}\text{H}_{11}\text{NO}_3$ :  $[\text{M}]^+$ , 193.0739. Found:  $m/z$  193.0738.

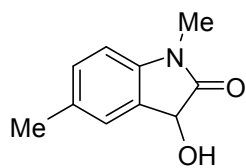

**3-Hydroxy-1,5-dimethylindolin-2-one (2g):** The title compound was obtained as a white powder in 98% yield. <sup>1</sup>H NMR (400 MHz, CDCl<sub>3</sub>) δ 7.29 (m, 1H), 7.14 (d, *J* = 7.7 Hz, 1H), 6.72 (d, *J* = 7.8 Hz, 1H), 5.05 (s, 1H), 3.18 (s, 3H), 2.35 (s, 3H). <sup>13</sup>C NMR (101 MHz, CDCl<sub>3</sub>) δ 177.69, 141.47, 133.04, 129.93, 127.44, 126.12, 108.33, 70.02, 26.42, 21.19. HRMS (EI) Calcd. for C<sub>10</sub>H<sub>11</sub>NO<sub>2</sub>: [M]<sup>+</sup>, 177.0790. Found: *m/z* 177.0794.

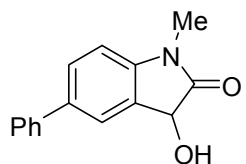

**3-Hydroxy-1-methyl-5-phenylindolin-2-one (2h):** The title compound was obtained as a white powder in 77% yield. <sup>1</sup>H NMR (400 MHz, CDCl<sub>3</sub>) δ 7.71 (s, 1H), 7.60 – 7.54 (m, 3H), 7.44 (dd, *J* = 10.4, 4.8 Hz, 2H), 7.34 (t, *J* = 7.3 Hz, 1H), 6.90 (d, *J* = 8.1 Hz, 1H), 5.14 (s, 1H), 3.59 (s, 1H), 3.23 (s, 3H). <sup>13</sup>C NMR (101 MHz, DMSO) δ 176.09, 143.24, 140.07, 134.47, 129.35, 128.95, 127.48, 126.92, 126.23, 122.81, 108.81, 68.87, 25.90. HRMS (EI) Calcd. for C<sub>15</sub>H<sub>13</sub>NO<sub>2</sub>: [M]<sup>+</sup>, 239.0946. Found: *m/z* 239.0948.

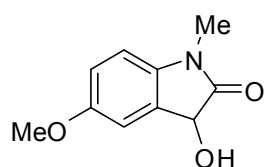

**3-Hydroxy-5-methoxy-1-methylindolin-2-one (2i):** The title compound was obtained as a white powder in 88% yield. <sup>1</sup>H NMR (400 MHz, CDCl<sub>3</sub>) δ 7.10 (d, *J* = 2.0 Hz, 1H), 6.86 (dd, *J* = 8.5, 2.5 Hz, 1H), 6.74 (d, *J* = 8.5 Hz, 1H), 5.07 (s, 1H), 3.81 (s, 3H), 3.17 (s, 3H). <sup>13</sup>C NMR (101 MHz, CDCl<sub>3</sub>) δ 177.07, 156.69, 137.32, 128.47, 114.68, 112.25, 109.15, 70.34, 56.06, 26.53. HRMS (EI) Calcd. for C<sub>10</sub>H<sub>11</sub>NO<sub>3</sub>: [M]<sup>+</sup>, 193.0739. Found: *m/z* 193.0741.

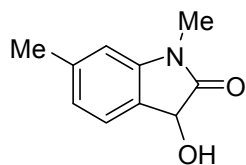

**3-Hydroxy-1,6-dimethylindolin-2-one (2ja):** The title compound was obtained as a pale yellow powder in 97% yield. <sup>1</sup>H NMR (400 MHz, CDCl<sub>3</sub>) δ 7.33 (d, *J* = 7.5 Hz, 1H), 6.91 (d, *J* = 7.4 Hz, 1H), 6.65 (s, 1H), 5.03 (s, 1H), 3.17 (s, 3H), 2.39 (s, 3H). <sup>13</sup>C NMR (101 MHz, CDCl<sub>3</sub>) δ 177.76, 144.10, 140.25, 125.07, 124.35, 123.86, 109.58, 69.86, 26.39, 22.10. HRMS (EI) Calcd. for C<sub>10</sub>H<sub>11</sub>NO<sub>2</sub>: [M]<sup>+</sup>, 177.0790. Found: *m/z* 177.0793.

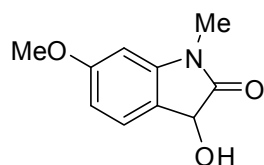

**3-Hydroxy-6-methoxy-1-methylindolin-2-one (2ka):** The title compound was obtained as a pale yellow powder in 79% yield. <sup>1</sup>H NMR (500 MHz, CDCl<sub>3</sub>) δ 7.35 (d, *J* = 8.0 Hz, 1H), 6.59 (d, *J* = 8.1 Hz, 1H), 6.41 (s, 1H), 5.00 (s, 1H), 3.84 (s, 3H), 3.17 (s, 3H), 2.99 (s, 1H). <sup>13</sup>C NMR (126 MHz, DMSO) δ 176.52, 160.57, 145.10, 125.23, 120.36, 106.35, 96.04, 68.27, 55.39, 25.76. HRMS (EI) Calcd. for C<sub>10</sub>H<sub>11</sub>NO<sub>3</sub>: [M]<sup>+</sup>, 193.0739. Found: *m/z* 193.0743.

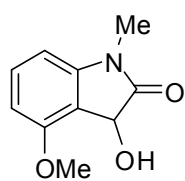

**3-Hydroxy-4-methoxy-1-methylindolin-2-one (2kb):** The title compound was obtained as a pale yellow powder in 76% yield.  $^1\text{H}$  NMR (500 MHz,  $\text{CDCl}_3$ )  $\delta$  7.31 (t,  $J$  = 8.1 Hz, 1H), 6.66 (d,  $J$  = 6.7 Hz, 1H), 6.49 (d,  $J$  = 5.8 Hz, 1H), 5.15 (s, 1H), 3.91 (s, 3H), 3.17 (s, 3H), 2.89 (s, 1H).  $^{13}\text{C}$  NMR (126 MHz, DMSO)  $\delta$  175.78, 156.44, 145.34, 130.72, 113.68, 106.73, 101.65, 67.45, 55.31, 25.90. HRMS (EI) Calcd. for  $\text{C}_{10}\text{H}_{11}\text{NO}_3$ :  $[\text{M}]^+$ , 193.0739. Found:  $m/z$  193.0740.

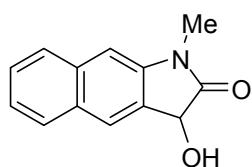

**3-Hydroxy-1-methyl-1H-benzo[f]indol-2(3H)-one (2l):** The title compound was obtained as a white powder in 89% yield.  $^1\text{H}$  NMR (400 MHz, DMSO)  $\delta$  7.90 (d,  $J$  = 8.0 Hz, 1H), 7.85 (d,  $J$  = 10.2 Hz, 2H), 7.48 (t,  $J$  = 7.2 Hz, 1H), 7.38 (t,  $J$  = 7.4 Hz, 1H), 7.31 (s, 1H), 6.39 (d,  $J$  = 7.6 Hz, 1H), 5.07 (d,  $J$  = 6.8 Hz, 1H), 3.19 (s, 3H).  $^{13}\text{C}$  NMR (101 MHz, DMSO)  $\delta$  175.52, 141.87, 133.99, 129.88, 129.72, 128.24, 126.96, 126.63, 123.02, 123.94, 103.50, 68.25, 26.02. HRMS (EI) Calcd. for  $\text{C}_{13}\text{H}_{11}\text{NO}_2$ :  $[\text{M}]^+$ , 213.0790. Found:  $m/z$  213.0791.

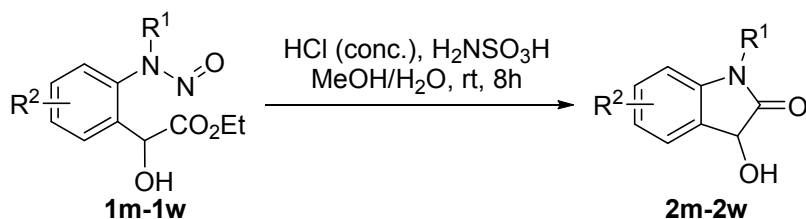

### General procedure for the synthesis of 3-hydroxy-2-oxindoles under HCl/H<sub>2</sub>NSO<sub>3</sub>H condition:

To a 25 mL Schlenk flask were charged with the C-H functionalization product (for example, **1a**, 47.6 mg, 0.2 mmol, 1 equiv) and H<sub>2</sub>NSO<sub>3</sub>H (97 mg, 1 mmol, 5 equiv). Then H<sub>2</sub>O (1 mL), MeOH (1 mL), and conc. HCl (1 mL) were added to the flask. The reaction was allowed to proceed at rt for 8 h. To the resulting solution was added 10 mL CH<sub>2</sub>Cl<sub>2</sub>. The two phases were separated with a separation funnel, and the aqueous phase was extracted twice with CH<sub>2</sub>Cl<sub>2</sub> (10 mL). The organic phase are combined and washed with saturated brine. The solvent was removed in vacuo to directly yield the product unless otherwise noted (recrystallization from EtOAc).

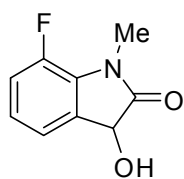

**7-Fluoro-3-hydroxy-1-methylindolin-2-one (2m):** The title compound was obtained as a slightly grayish white powder in 68% yield.  $^1\text{H}$  NMR (400 MHz,  $\text{CDCl}_3$ )  $\delta$  7.24 (m, 1H), 7.11 – 7.00 (m, 2H), 5.07 (s, 1H), 3.41 (d,  $J$  = 2.7 Hz, 3H).  $^{13}\text{C}$  NMR (101 MHz, DMSO)  $\delta$  175.79, 146.85 (d,  $J$  = 241.5 Hz), 131.77 (d,  $J$  = 2.8 Hz), 129.87 (d,  $J$  = 8.1 Hz), 123.16 (d,  $J$  = 6.3 Hz), 120.79 (d,  $J$  = 3.0 Hz), 116.93 (d,  $J$  = 19.1 Hz), 68.72 (d,  $J$  = 2.6 Hz), 28.15 (d,  $J$  = 5.4 Hz). HRMS (EI) Calcd. for  $\text{C}_9\text{H}_8\text{FNO}_2$ :  $[\text{M}]^+$ , 181.0539. Found:  $m/z$  181.0542.

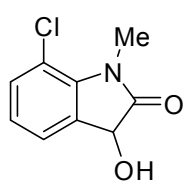

**7-Chloro-3-hydroxy-1-methylindolin-2-one (2n):** The title compound was obtained through recrystallization as a pale yellow powder in 97% yield.  $^1\text{H}$  NMR (400 MHz,  $\text{CDCl}_3$ )  $\delta$  7.35 (d,  $J$  = 7.3 Hz, 1H), 7.29 (m, 1H), 7.08 – 6.98 (m, 1H), 5.04 (s, 1H), 3.56 (s, 3H), 3.41 (s, 1H).  $^{13}\text{C}$  NMR (126 MHz, DMSO)  $\delta$  176.31, 174.48, 139.37, 139.15, 132.08, 131.89, 130.86, 129.38, 124.13, 123.52, 123.22, 114.05, 77.51, 68.23, 28.91. HRMS (EI) Calcd. for  $\text{C}_9\text{H}_8\text{ClNO}_2$ :  $[\text{M}]^+$ , 197.0244. Found:  $m/z$  197.0240.

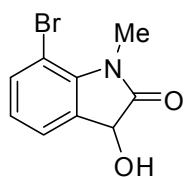

**7-Bromo-3-hydroxy-1-methylindolin-2-one (2o):** The title compound was obtained as a pale yellow powder in 67% yield.  $^1\text{H}$  NMR (400 MHz,  $\text{CDCl}_3$ )  $\delta$  7.45 (d,  $J$  = 8.2 Hz, 1H), 7.39 (dt,  $J$  = 7.3, 1.1 Hz, 1H), 6.96 (dd,  $J$  = 8.1, 7.4 Hz, 1H), 5.03 (s, 1H), 3.58 (s, 3H).  $^{13}\text{C}$  NMR (126 MHz, DMSO)  $\delta$  176.50, 140.61, 134.18, 132.15, 123.92, 101.36, 68.22, 29.13. HRMS (EI) Calcd. for  $\text{C}_9\text{H}_8\text{BrNO}_2$ :  $[\text{M}]^+$ , 240.9738. Found:  $m/z$  240.9736.

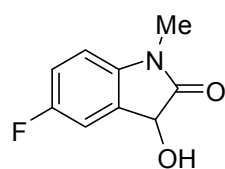

**5-Fluoro-3-hydroxy-1-methylindolin-2-one (2p):** The title compound was obtained as a white powder in 95% yield.  $^1\text{H}$  NMR (400 MHz,  $\text{CDCl}_3$ )  $\delta$  7.22 (ddd,  $J$  = 7.6, 2.6, 0.8 Hz, 1H), 7.05 (td,  $J$  = 8.8, 2.6 Hz, 1H), 6.76 (dd,  $J$  = 8.5, 4.0 Hz, 1H), 5.07 (s, 1H), 3.49 (s, 1H), 3.19 (s, 3H).  $^{13}\text{C}$  NMR (126 MHz, DMSO)  $\delta$  175.77, 158.47 (d,  $J$  = 237.8 Hz), 139.83, 130.41 (d,  $J$  = 7.6 Hz), 115.02 (d,  $J$  = 23.3 Hz), 112.32 (d,  $J$  = 24.6 Hz), 109.20 (d,  $J$  = 7.7 Hz), 68.86, 25.89. HRMS (EI) Calcd. for  $\text{C}_9\text{H}_8\text{FNO}_2$ :  $[\text{M}]^+$ , 181.0539. Found:  $m/z$  181.0541.

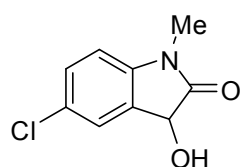

**5-Chloro-3-hydroxy-1-methylindolin-2-one (2q):** The title compound was obtained as a white powder in 82% yield.  $^1\text{H}$  NMR (500 MHz,  $\text{CDCl}_3$ )  $\delta$  7.44 (s, 1H), 7.32 (d,  $J$  = 8.3 Hz, 1H), 6.75 (d,  $J$  = 8.3 Hz, 1H), 5.05 (s, 1H), 3.18 (s, 3H).  $^{13}\text{C}$  NMR (101 MHz, DMSO)  $\delta$  175.66, 142.59, 130.68, 128.79, 126.29, 124.54, 109.94, 68.66, 25.94. HRMS (EI) Calcd. for  $\text{C}_9\text{H}_8\text{ClNO}_2$ :  $[\text{M}]^+$ , 197.0244. Found:  $m/z$  197.0241.

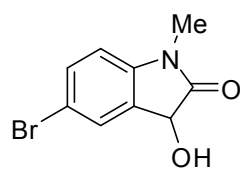

**5-Bromo-3-hydroxy-1-methylindolin-2-one (2r):** The title compound was obtained as a white powder in 96% yield.  $^1\text{H}$  NMR (500 MHz,  $\text{CDCl}_3$ )  $\delta$  7.58 (s, 1H), 7.47 (d,  $J$  = 7.4 Hz, 1H), 6.71 (d,  $J$  = 8.3 Hz, 1H), 5.06 (s, 1H), 3.18 (s, 3H).  $^{13}\text{C}$  NMR (126 MHz, DMSO)  $\delta$  175.47, 142.97, 131.60, 131.03, 127.20, 113.93, 110.41, 68.56, 25.86. HRMS (EI) Calcd. for  $\text{C}_9\text{H}_8\text{BrNO}_2$ :  $[\text{M}]^+$ , 240.9738. Found:  $m/z$  240.9741.

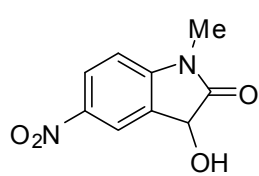

**3-Hydroxy-1-methyl-5-nitroindolin-2-one (2s):** The title compound was obtained through recrystallization as a pale yellow powder in 56% yield.  $^1\text{H}$  NMR (400 MHz,  $\text{CDCl}_3$ )  $\delta$  8.41 – 8.24 (m, 2H), 6.93 (d,  $J$  = 8.6 Hz, 1H), 5.14 (s, 1H), 3.27 (s, 3H), 3.12 (s, 1H).  $^{13}\text{C}$  NMR (101 MHz, DMSO)  $\delta$  176.48, 149.82, 142.51, 129.69, 126.37, 119.67, 108.77, 68.20, 26.31. HRMS (EI) Calcd. for  $\text{C}_9\text{H}_8\text{N}_2\text{O}_4$ :  $[\text{M}]^+$ , 208.0484. Found:  $m/z$  208.0487.

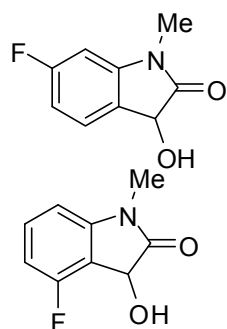

**6-Fluoro-3-hydroxy-1-methylindolin-2-one (2ta), 4-fluoro-3-hydroxy-1-methylindolin-2-one (2tb):** The title compounds were obtained as a white solid of inseparable mixture (1:0.2 by  $^1\text{H}$  NMR) in 76% yield. The  $^{13}\text{C}$  NMR data listed here represent peak information only for **2ta**.  $^1\text{H}$  NMR (400 MHz,  $\text{CDCl}_3$ )  $\delta$  7.41 (ddd,  $J$  = 8.1, 5.4, 0.9 Hz, 1H  $\times$  0.2), 7.33 (ddd,  $J$  = 13.4, 6.7, 3.0 Hz, 1H), 6.84 – 6.75 (m, 1H + 1H  $\times$  0.2), 6.65 (d,  $J$  = 7.8 Hz, 1H), 6.58 (dd,  $J$  = 8.7, 2.3 Hz, 1H  $\times$  0.2), 5.25 (s, 1H), 5.05 (s, 1H  $\times$  0.2), 3.20 (s, 3H), 3.18 (s, 3H  $\times$  0.2).  $^{13}\text{C}$  NMR (101 MHz, DMSO)  $\delta$  175.34, 158.85 (d,  $J$  = 247.5 Hz), 146.09 (d,  $J$  = 9.3 Hz), 131.41 (d,  $J$  = 8.9 Hz), 113.92 (d,  $J$  = 21.0 Hz), 109.78 (d,  $J$  = 20.8 Hz), 105.01 (d,  $J$  = 2.7 Hz), 67.07, 26.23. HRMS (EI) Calcd. for  $\text{C}_9\text{H}_8\text{FNO}_2$ :  $[\text{M}]^+$ , 181.0539. Found:  $m/z$  181.0540.

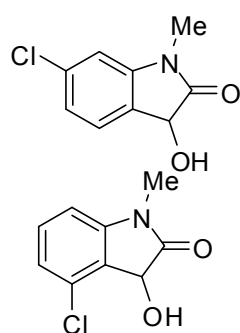

**6-Chloro-3-hydroxy-1-methylindolin-2-one (2ua), 4-chloro-3-hydroxy-1-methylindolin-2-one (2ub):** The title compounds were obtained as a white solid of inseparable mixture (1:0.1 by  $^1\text{H}$  NMR) in 85% yield. The  $^{13}\text{C}$  NMR data listed here represent peak information only for **2ua**.  $^1\text{H}$  NMR (400 MHz,  $\text{CDCl}_3$ )  $\delta$  7.37 (d,  $J$  = 8.2 Hz, 1H), 7.29 (s, 1H  $\times$  0.1), 7.09 (dd,  $J$  = 7.9, 1.8 Hz, 1H), 7.06 (d,  $J$  = 8.4 Hz, 1H  $\times$  0.1), 6.84 (d,  $J$  = 1.7 Hz, 1H), 6.74 (d,  $J$  = 7.7 Hz, 1H  $\times$  0.1), 5.15 (s, 1H  $\times$  0.1), 5.03 (s, 1H), 3.20 (s, 3H  $\times$  0.1), 3.18 (s, 3H).  $^{13}\text{C}$  NMR (126 MHz, DMSO)  $\delta$  176.03, 145.24, 133.49, 127.39, 125.69, 121.65, 108.88, 68.27, 25.93. HRMS (EI) Calcd. for  $\text{C}_9\text{H}_8\text{ClNO}_2$ :  $[\text{M}]^+$ , 197.0244. Found:  $m/z$  197.0239.

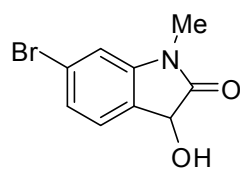

**6-Bromo-3-hydroxy-1-methylindolin-2-one (2va):** The title compound was obtained as a pale yellow powder in 81% yield.  $^1\text{H}$  NMR (400 MHz,  $\text{CDCl}_3$ )  $\delta$  7.32 (d,  $J$  = 7.8 Hz, 1H), 7.24 (d,  $J$  = 1.6 Hz, 1H), 6.99 (d,  $J$  = 1.5 Hz, 1H), 5.01 (s, 1H), 3.18 (s, 3H).  $^{13}\text{C}$  NMR (101 MHz, DMSO)  $\delta$  175.98, 145.37, 127.88, 126.11, 124.67, 121.83, 111.63, 68.36, 25.98. HRMS (EI) Calcd. for  $\text{C}_9\text{H}_8\text{BrNO}_2$ :  $[\text{M}]^+$ , 240.9738. Found:  $m/z$  240.9739.



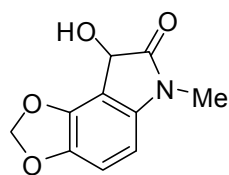

**8-Hydroxy-6-methyl-6H-[1,3]dioxolo[4,5-e]indol-7(8H)-one (2w):** The title compound was obtained through recrystallization as a pale yellow powder in 45% yield.  $^1\text{H}$  NMR (400 MHz,  $\text{CDCl}_3$ )  $\delta$  6.75 (d,  $J = 8.0$  Hz, 1H), 6.24 (d,  $J = 8.0$  Hz, 1H), 6.03 (d,  $J = 4.9$  Hz, 2H), 5.17 (s, 1H), 3.16 (s, 3H).  $^{13}\text{C}$  NMR (101 MHz, DMSO)  $\delta$  174.86, 144.12, 143.86, 138.91, 109.10, 107.40, 101.54, 99.96, 67.05, 26.19. HRMS (EI) Calcd. for  $\text{C}_{10}\text{H}_9\text{NO}_4$ :  $[\text{M}]^+$ , 207.0532. Found:  $m/z$  207.0533.

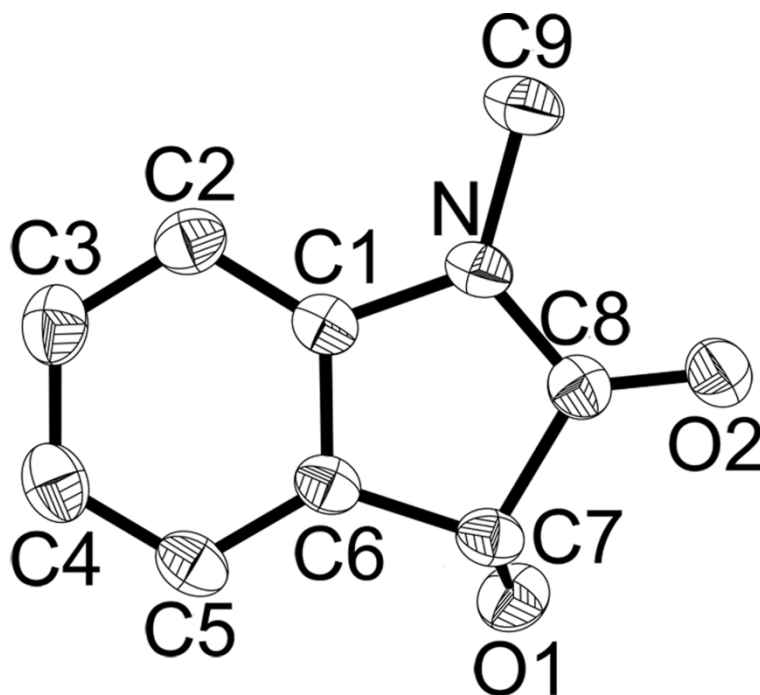

**Figure S1.** ORTEP drawing of **2a** showing 30% probability thermal ellipsoids. Hydrogen atoms are omitted for clarity.

### 3. Synthesis of Dimeric Product of 3-Hydroxy-2-oxindoles

#### Procedure for the synthesis of dimeric product:

To a 5 mL round-bottom flask equipped with magnetic stir bar was charged with **1a** (47.6 mg, 0.2 mmol, 1 equiv). An excess cold conc. HCl solution (2 mL) of CuCl (350 mg, 3.5 mmol, 17.5 equiv) was further added. The mixture was stirred at rt for 2 h and monitored by TLC. The reaction solution was diluted four times by ice water. The mixture was neutralized with saturated  $\text{Na}_2\text{CO}_3$  solution until no bubble could be observed, and then extracted with  $\text{CH}_2\text{Cl}_2$  for at least three times. The organic phase was combined, washed with saturated brine solution, dried over  $\text{MgSO}_4$ , filtered and the solvent was removed in vacuo. The residue was purified by flash column chromatography on silica gel with petroleum ether/EtOAc as the eluent. An orange oil was obtained.

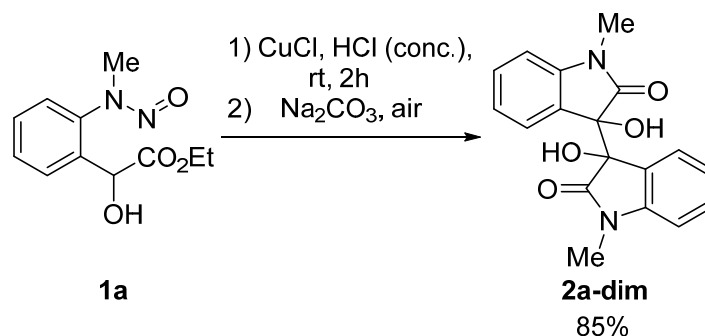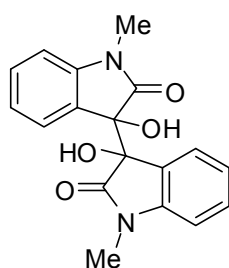

**3,3'-Dihydroxy-1,1'-dimethyl-3,3'-biindoline-2,2'-dione (2a-dim):** The title compound was obtained as an orange oil in 85% yield.  $^1\text{H}$  NMR (400 MHz,  $\text{CDCl}_3$ )  $\delta$  7.69 – 7.56 (m, 4H), 7.17 – 7.11 (m, 2H), 6.90 (d,  $J$  = 8.1 Hz, 2H), 3.26 (s, 6H).  $^{13}\text{C}$  NMR (101 MHz,  $\text{CDCl}_3$ )  $\delta$  183.53, 158.38, 151.60, 138.62, 125.40, 124.01, 117.55, 110.13, 26.38. HRMS (MALDI) Calcd. for  $\text{C}_{18}\text{H}_{16}\text{N}_2\text{NaO}_4$ :  $[\text{M} + \text{Na}]^+$ , 347.1002. Found:  $m/z$  347.1002.

#### 4. Halogen Removal from 3-Hydroxy-2-oxindoles under Raney Ni/ $\text{H}_2$ Condition

##### Procedure for the synthesis of halogen-removed 3-hydroxy-2-oxindoles:

The procedure has been described in the “General procedure for Synthesis and Characterization of 3-Hydroxy-2-oxindoles under Raney Ni/ $\text{H}_2$  condition” section. Products **2q** and **2q-dcl** (identical to **2a**) were obtained in a combined yield of 90% (with a ratio of 1:0.3) starting from **2q**. Product **2r-dbr** (identical to **2a**) was obtained in 88% yield.

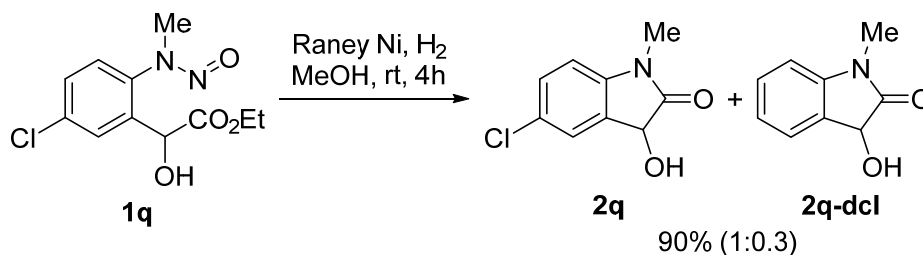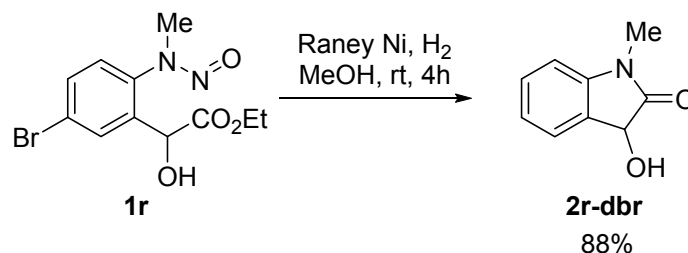

## 5. Synthesis and Characterization of t3 and t4

The procedure has been described in the “General procedure for Synthesis and Characterization of 3-Hydroxy-2-oxindoles under HCl/H<sub>2</sub>NSO<sub>3</sub>H condition” section.

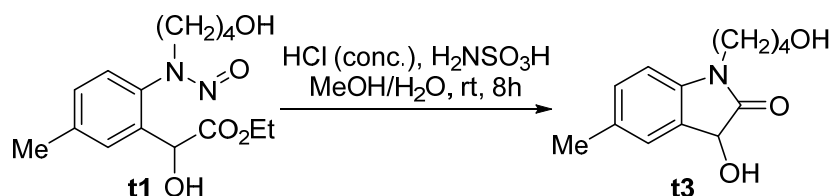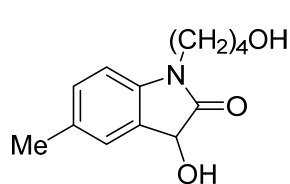

**3-hydroxy-1-(4-hydroxybutyl)-5-methylindolin-2-one (t3):** the title compound was obtained as a yellow oil in 51% yield. **<sup>1</sup>H NMR (400 MHz, CDCl<sub>3</sub>)**  $\delta$  7.25 (s, 1H), 7.07 (d,  $J$  = 7.9 Hz, 1H), 6.71 (d,  $J$  = 7.9 Hz, 1H), 5.00 (s, 1H), 3.66 (dd,  $J$  = 12.9, 6.9 Hz, 2H), 3.61 (t,  $J$  = 6.3 Hz, 2H), 2.30 (s, 3H), 1.73 (m, 2H), 1.56 (m, 2H). **<sup>13</sup>C NMR (101 MHz, CDCl<sub>3</sub>)**  $\delta$  177.34, 140.44, 132.69, 129.72, 127.60, 126.03, 108.56, 69.80, 61.81, 39.76, 29.51, 23.68, 20.97. **HRMS (DART)** Calcd. for C<sub>13</sub>H<sub>18</sub>NO<sub>3</sub>: [M + H]<sup>+</sup>, 236.1281. Found:  $m/z$  236.1280.

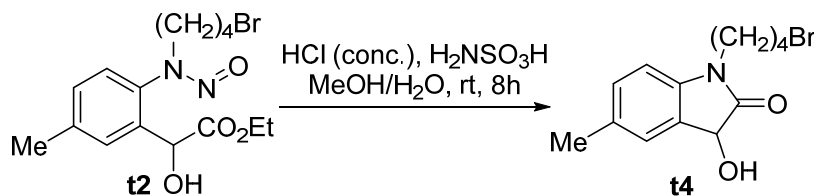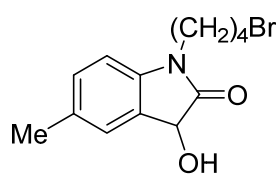

**1-(4-bromobutyl)-3-hydroxy-5-methylindolin-2-one (t4):** the title compound was obtained as an orange solid in 64% yield. **<sup>1</sup>H NMR (400 MHz, CDCl<sub>3</sub>)**  $\delta$  7.30 (s, 1H), 7.12 (d,  $J$  = 7.9 Hz, 1H), 6.74 (d,  $J$  = 8.0 Hz, 1H), 5.47 – 4.81 (m, 1H), 4.31 (s, 1H), 3.80 – 3.58 (m, 2H), 3.55 – 3.39 (m, 2H), 2.32 (d,  $J$  = 12.0 Hz, 3H), 1.96 – 1.68 (m, 4H). **<sup>13</sup>C NMR (101 MHz, CDCl<sub>3</sub>)**  $\delta$  177.15, 140.47, 132.91, 129.93, 127.15, 126.23, 108.43, 69.82, 39.06, 33.00, 29.64, 25.80, 21.01. **HRMS (DART)** Calcd. for C<sub>13</sub>H<sub>17</sub>NO<sub>2</sub>Br: [M + H]<sup>+</sup>, 298.0437. Found:  $m/z$  298.0435.

## 6. Reference

S1 J. Chen, P. Chen, C. Song and J. Zhu, *Chem. - Eur. J.*, 2014, In Press.

## 7. $^1\text{H}$ and $^{13}\text{C}$ NMR Spectra for the Compounds

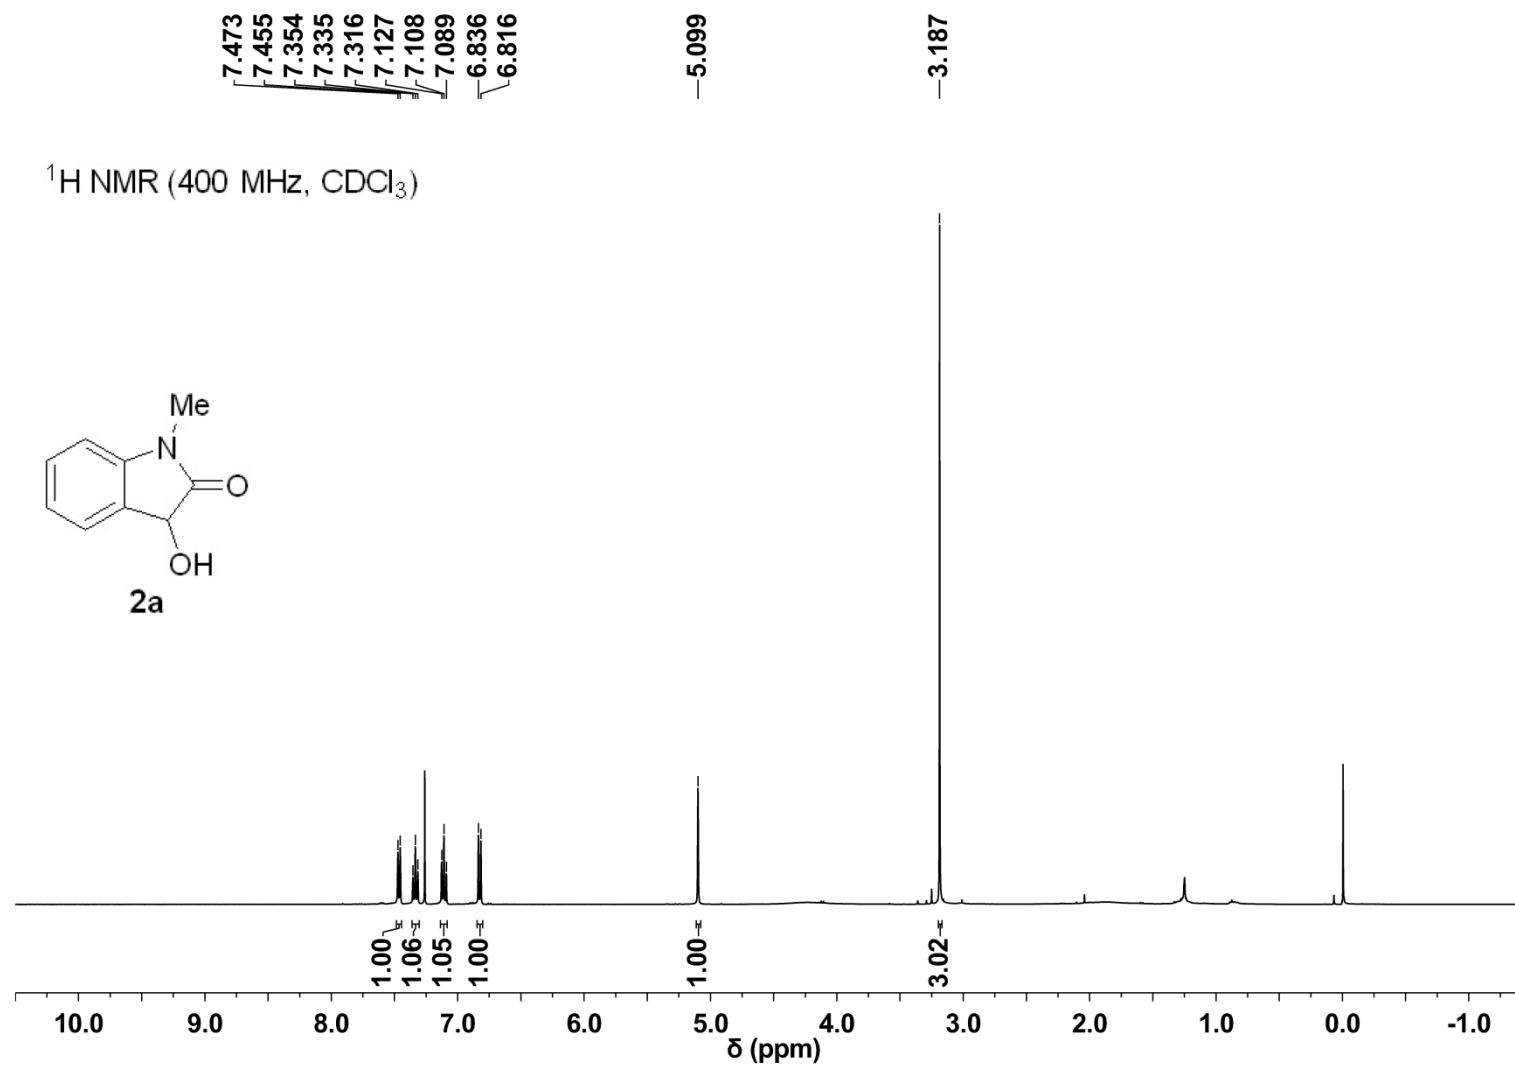

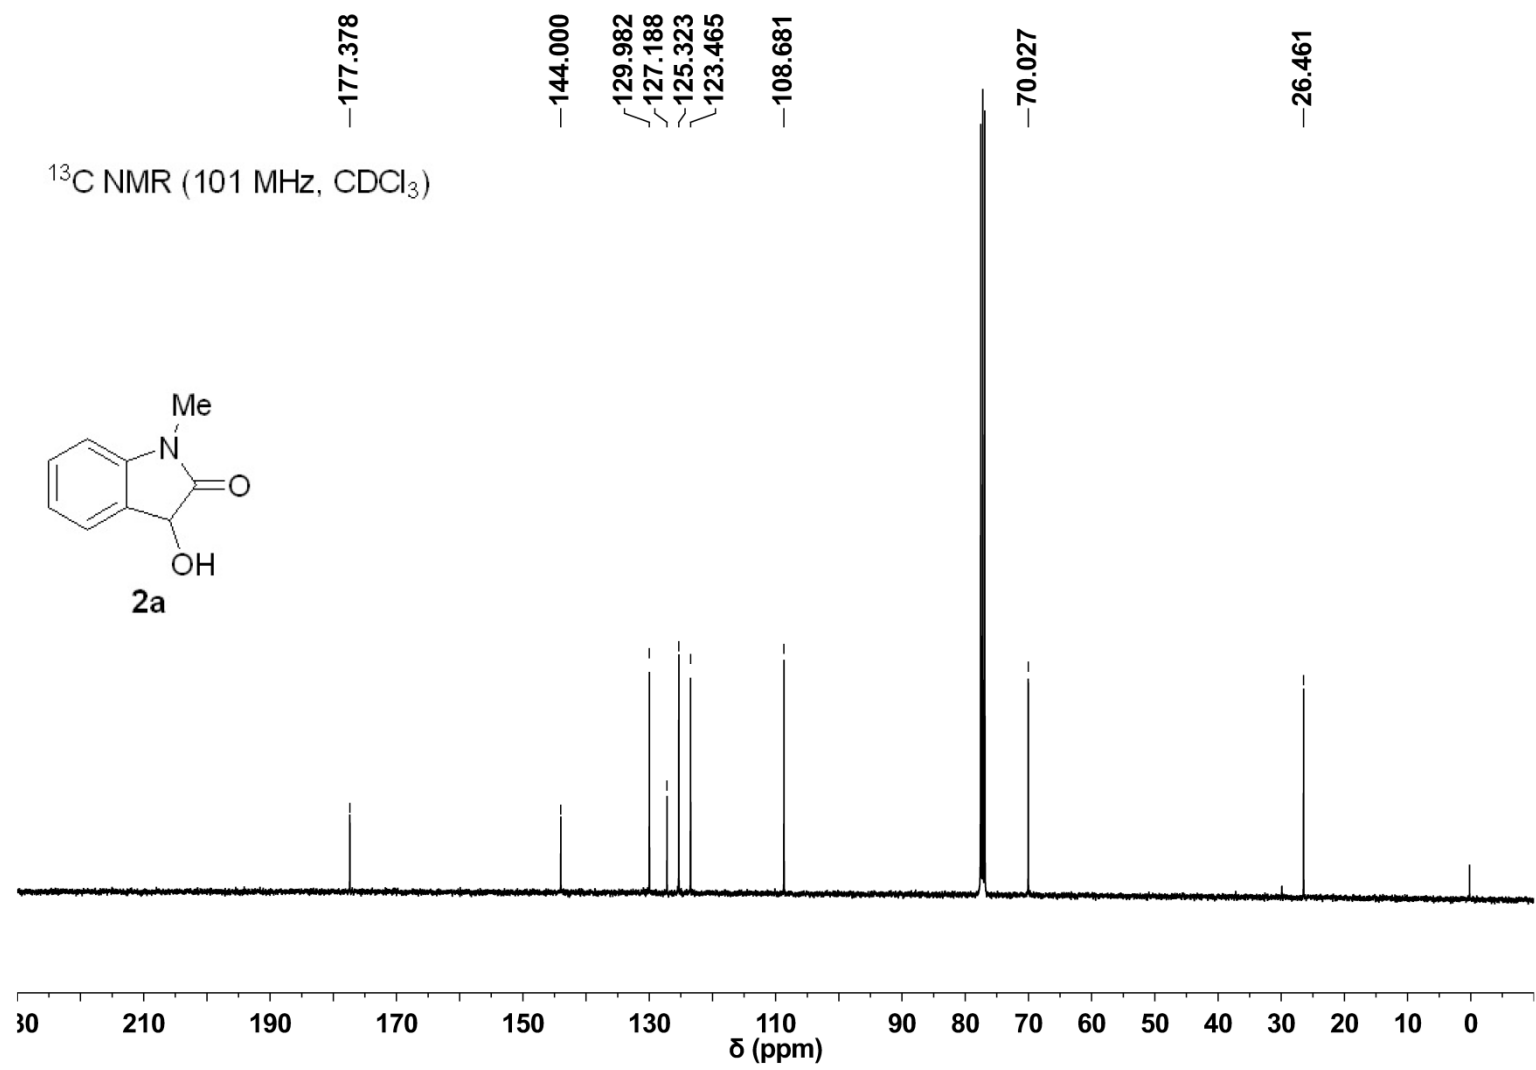

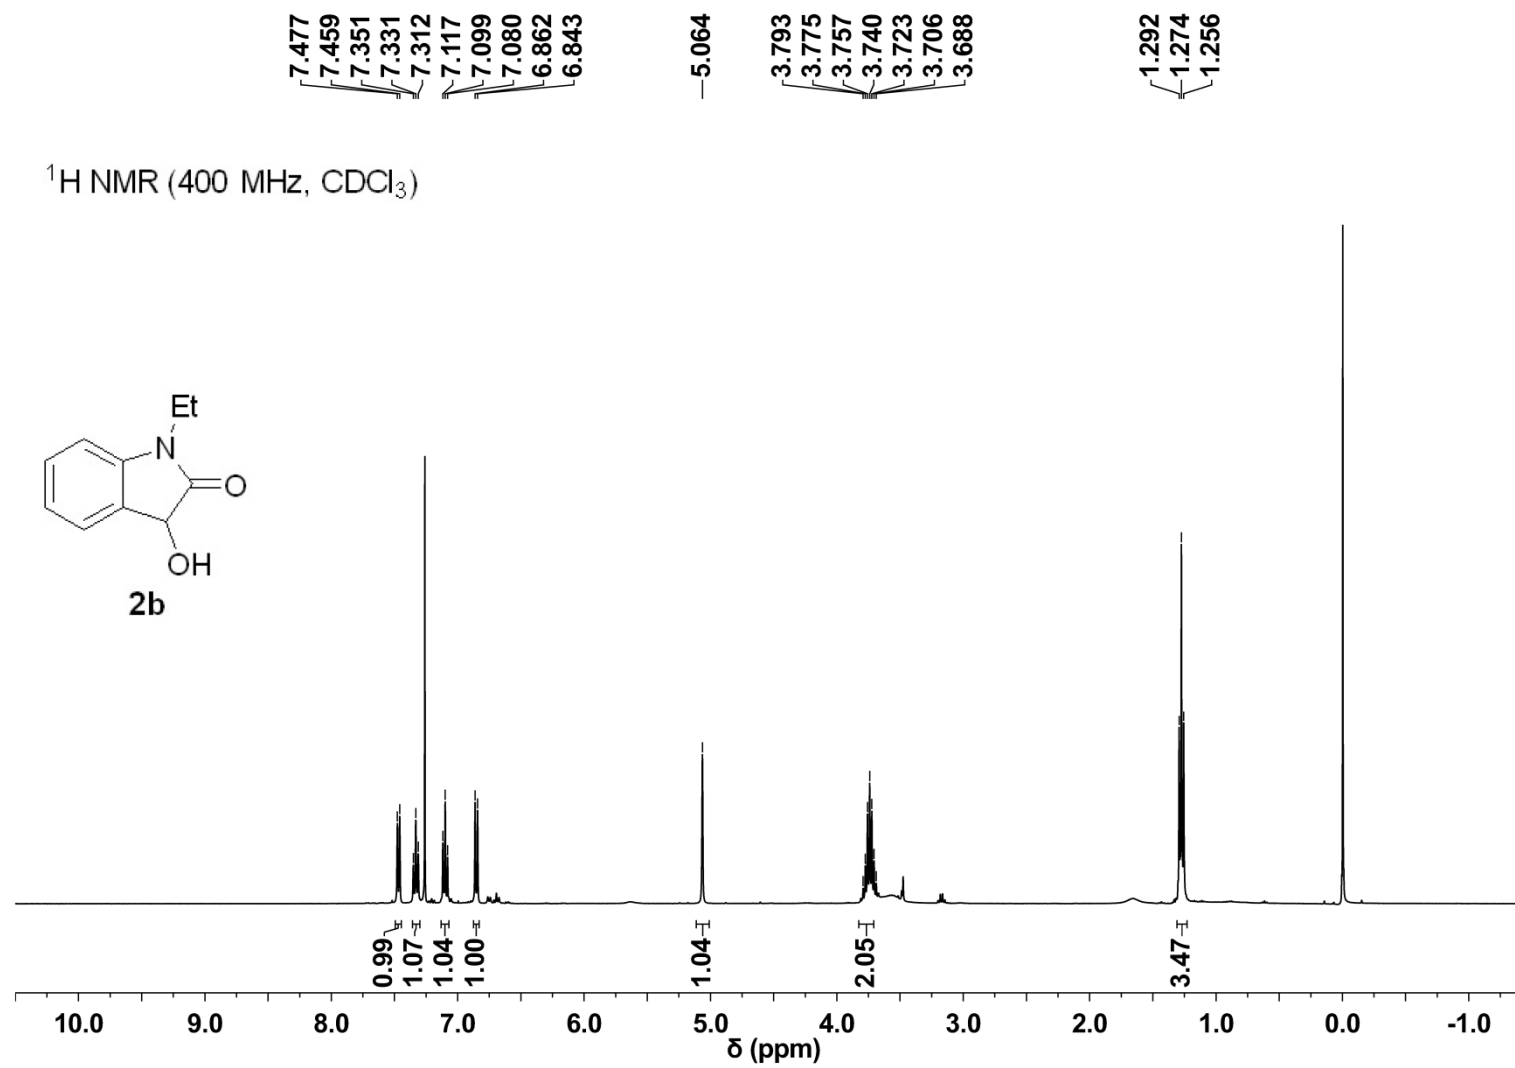

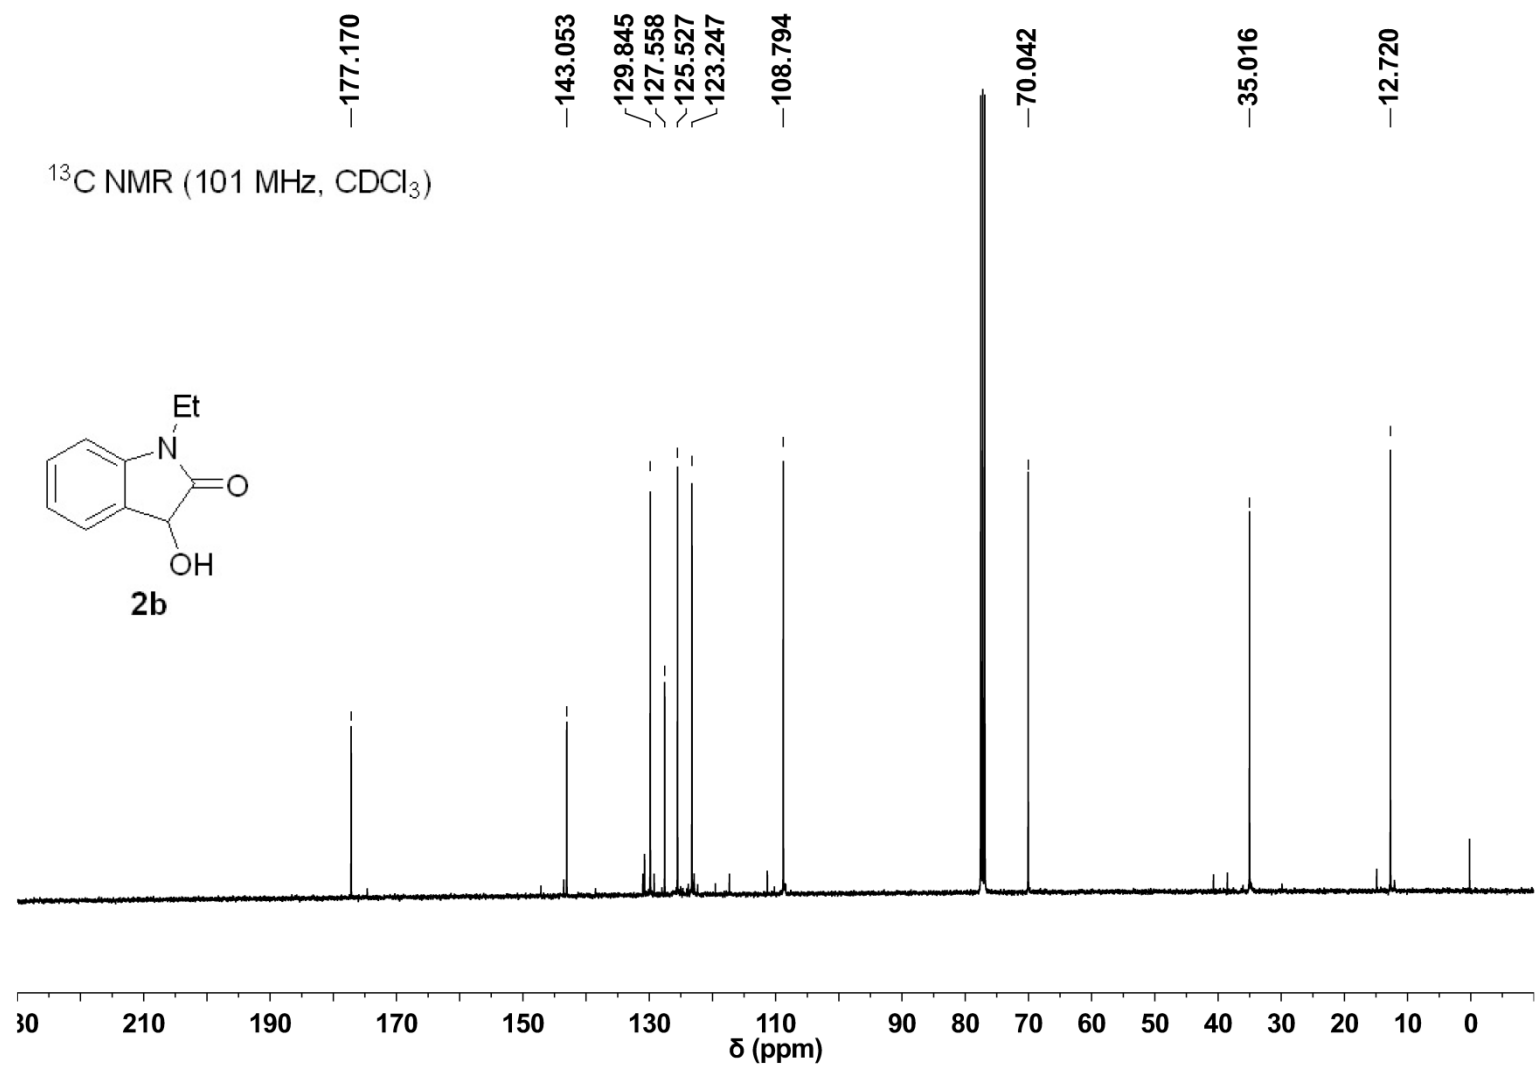



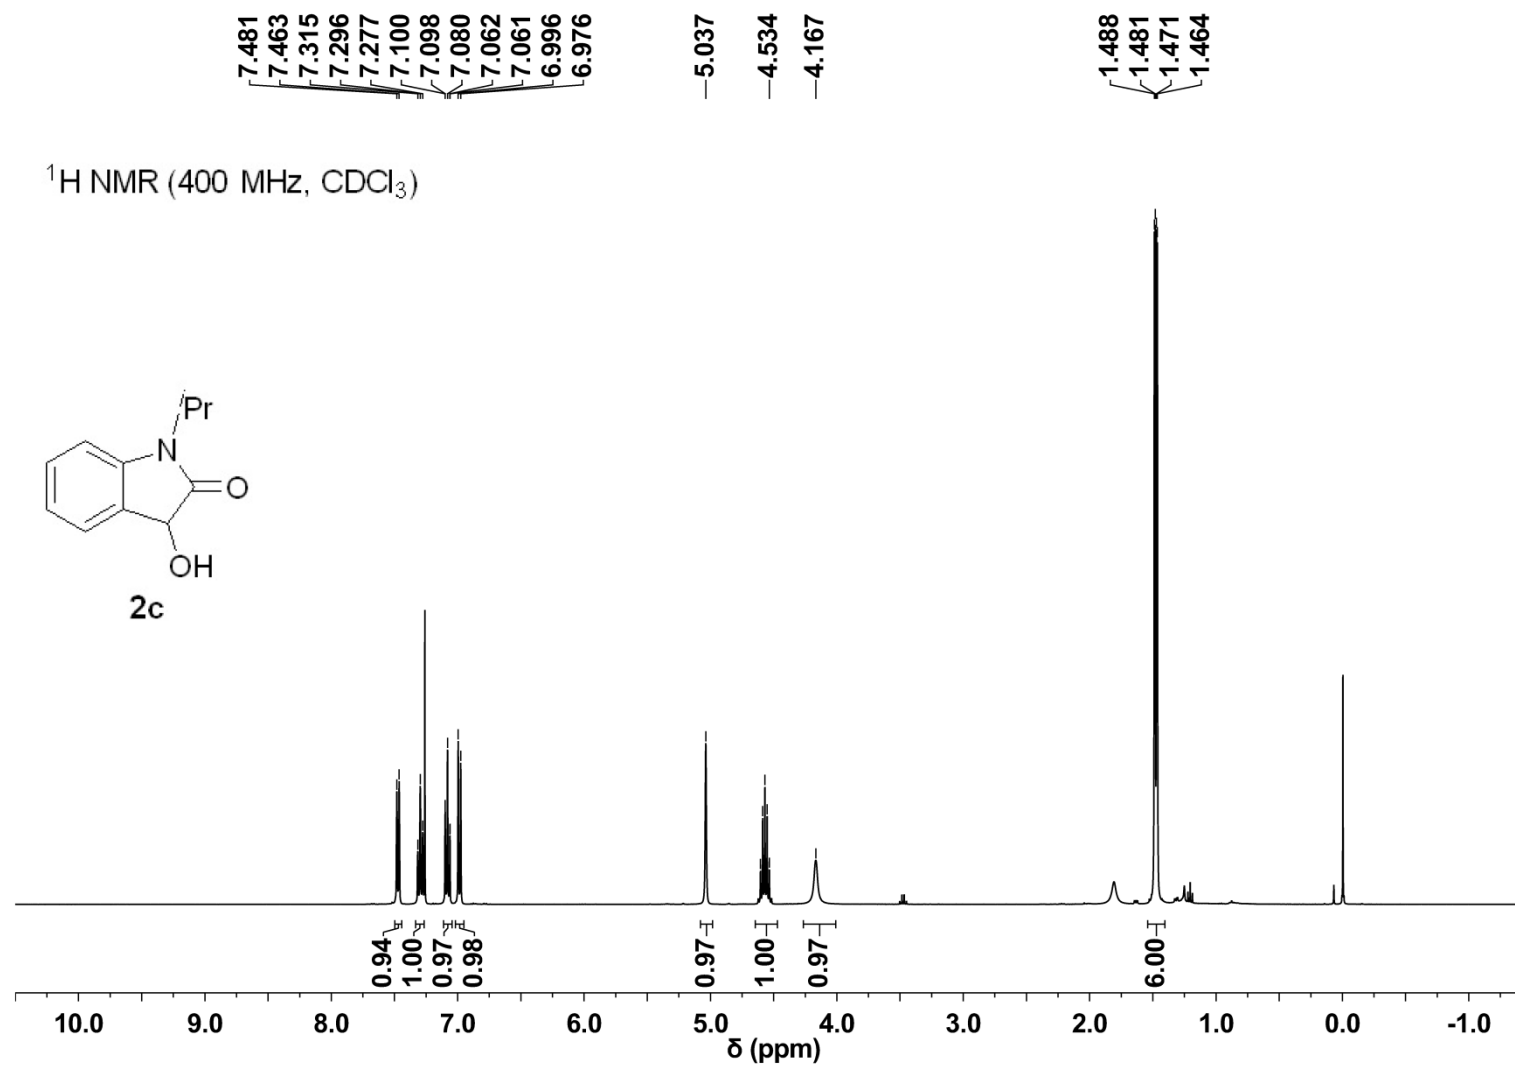

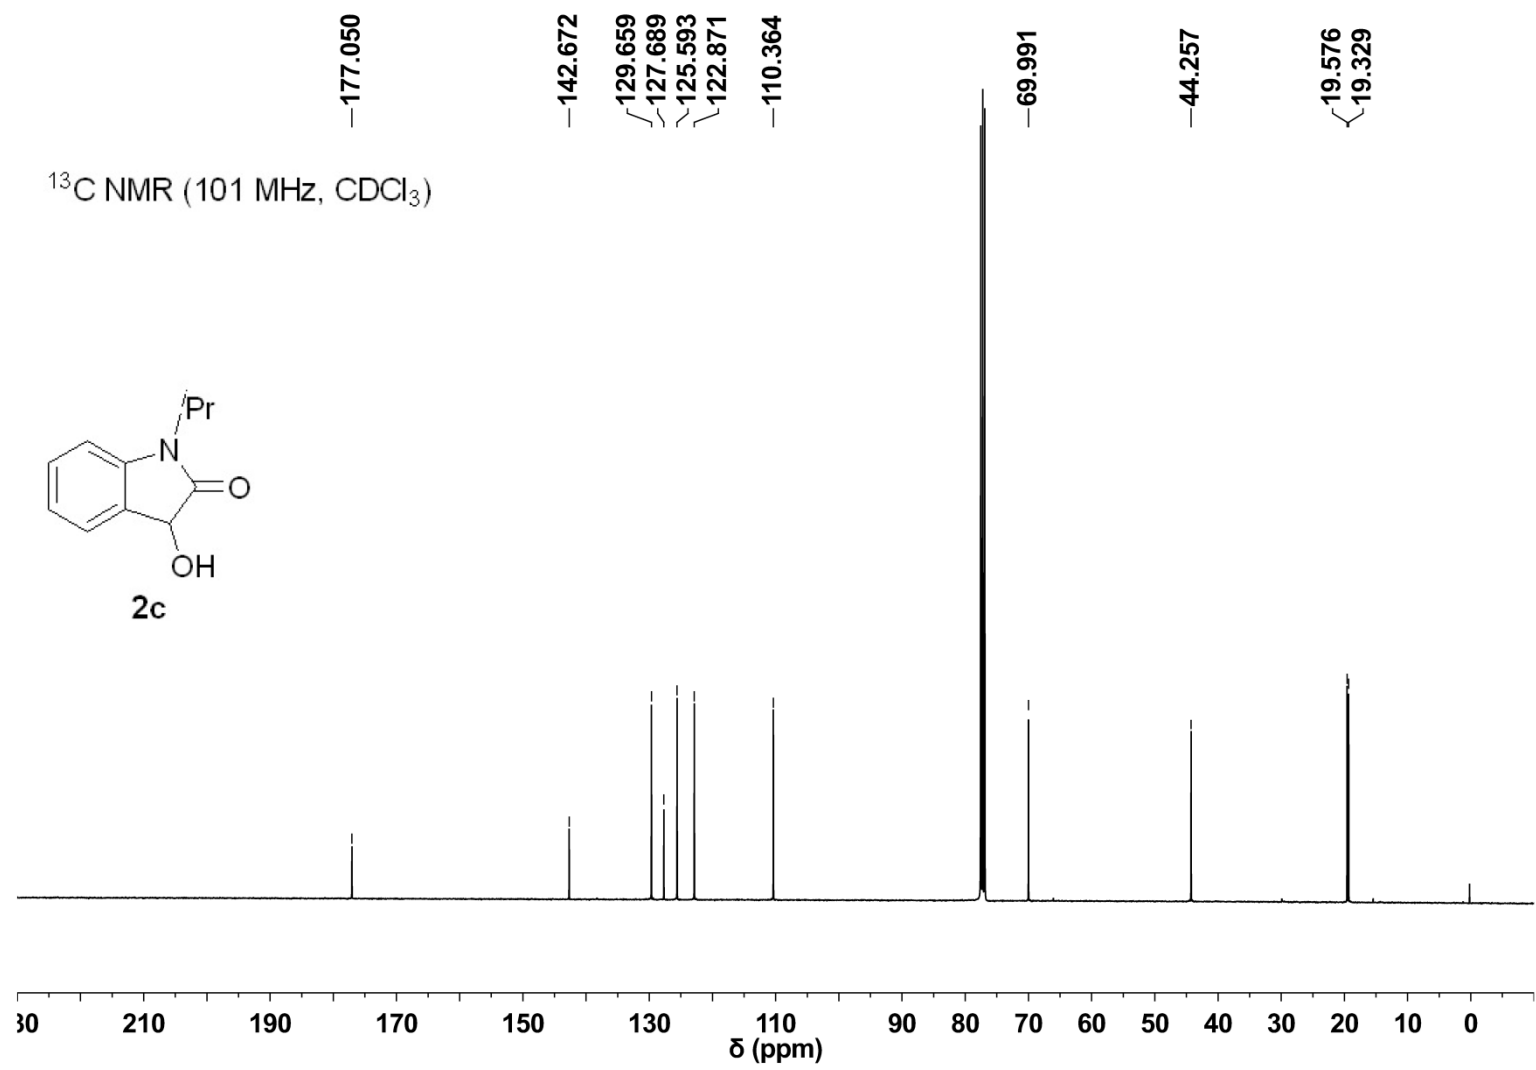

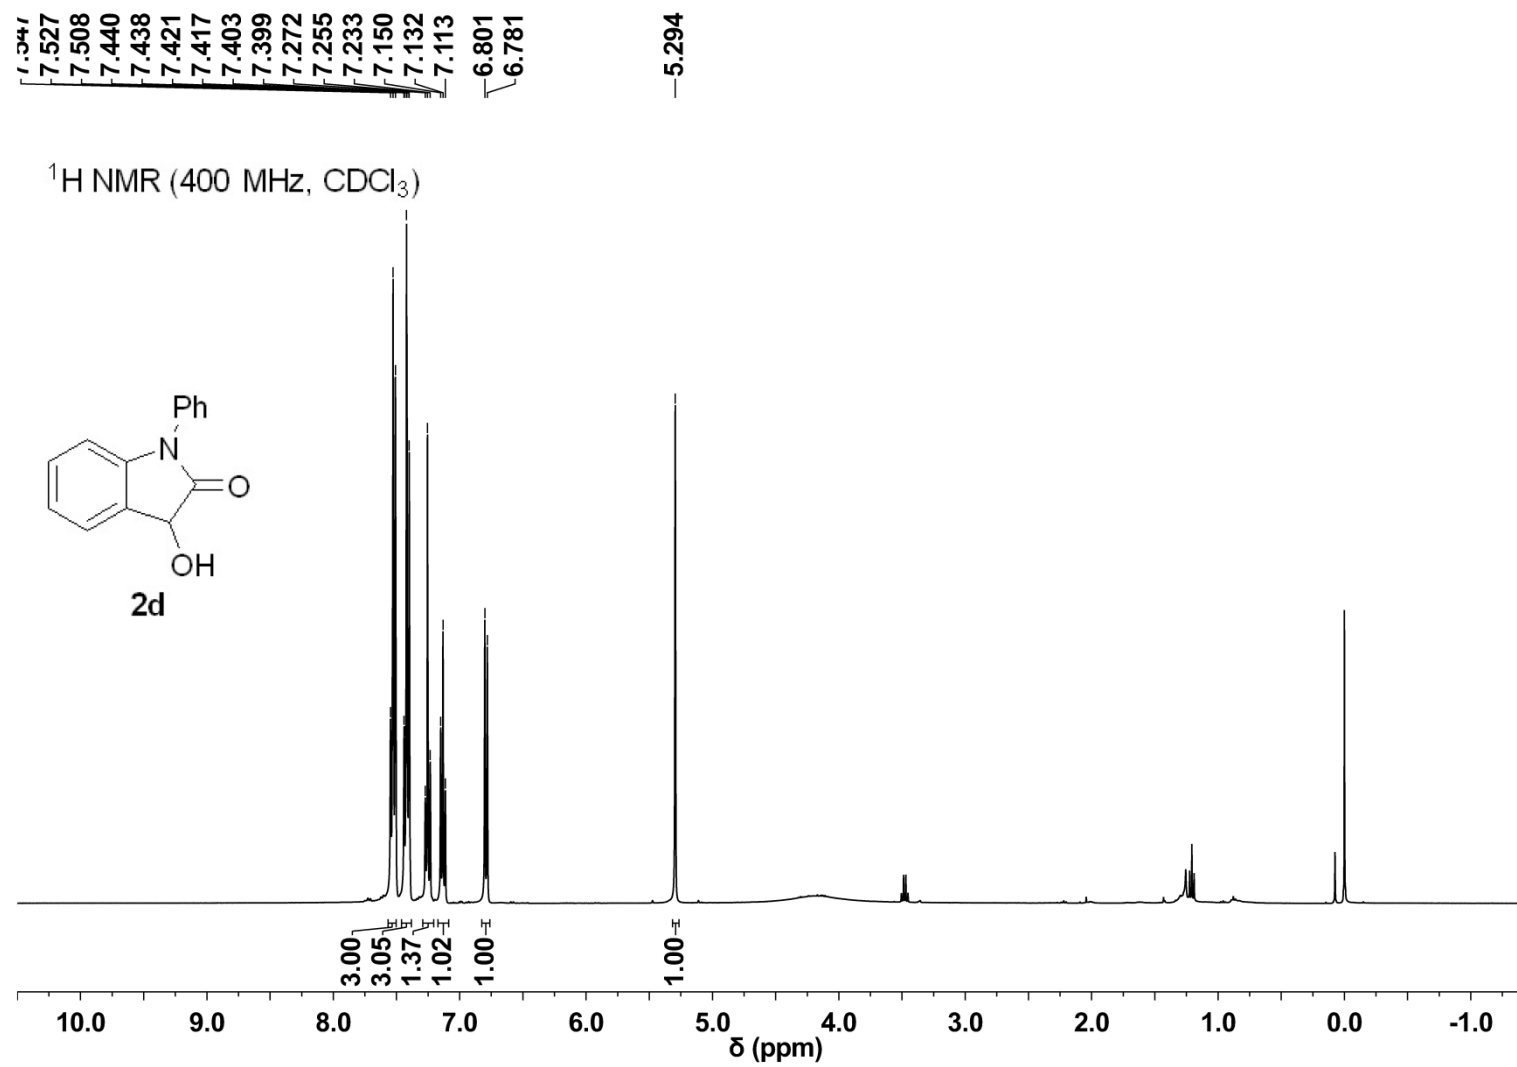

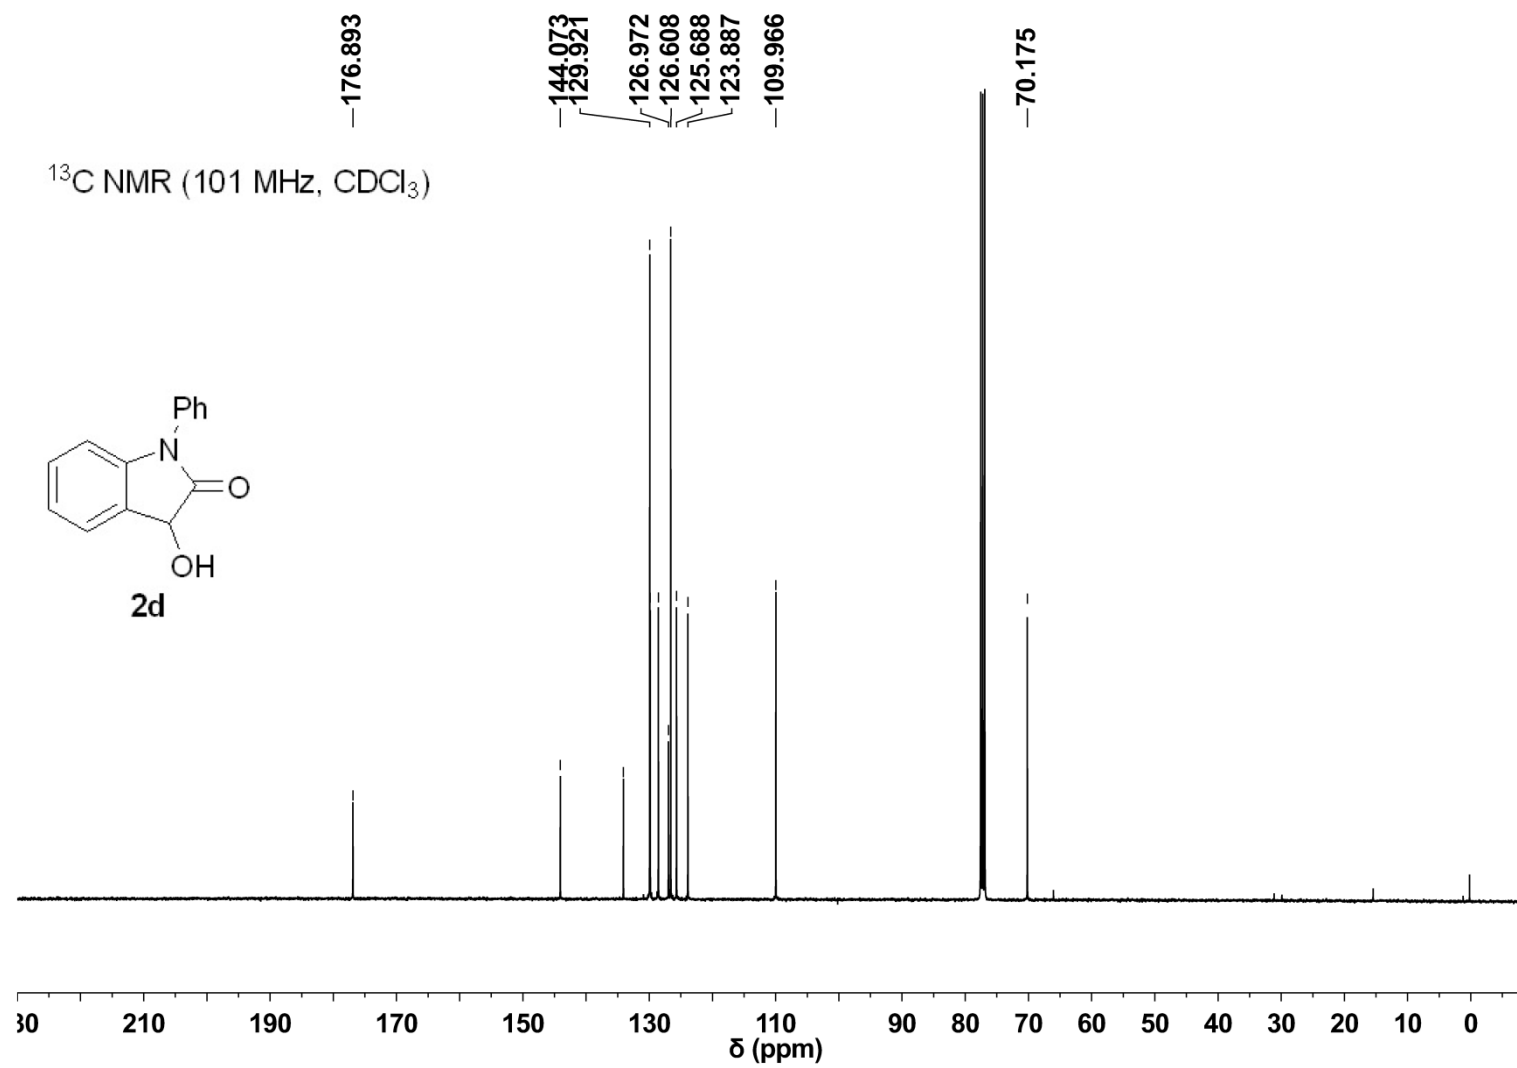

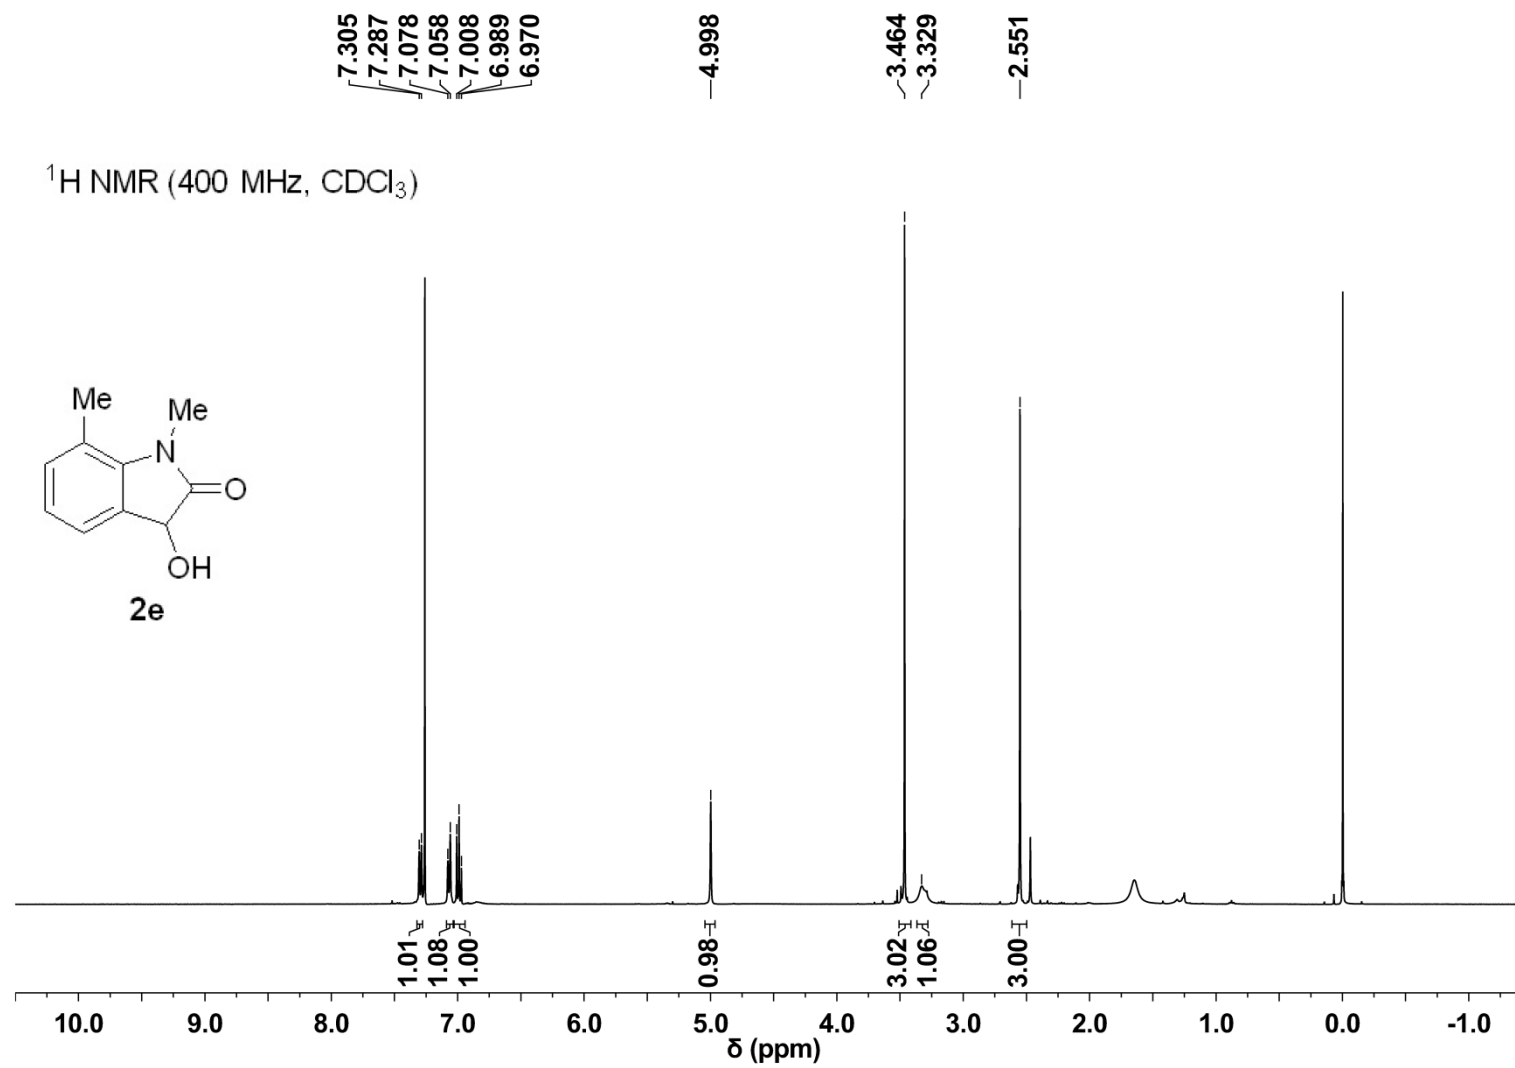

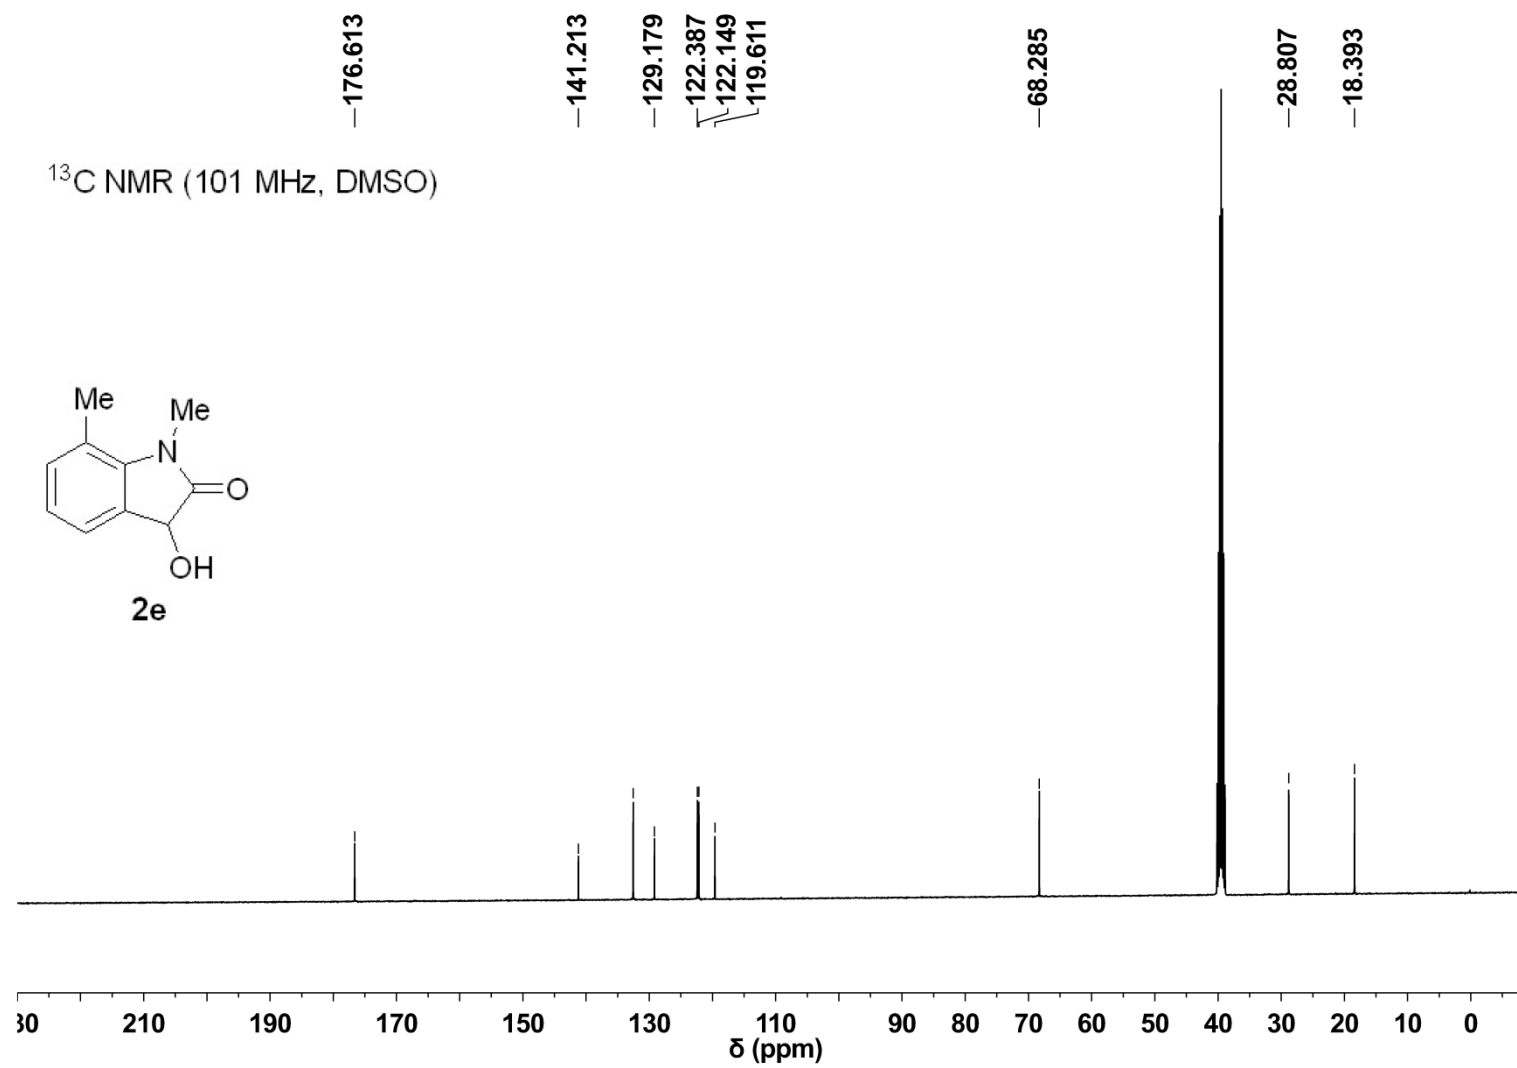

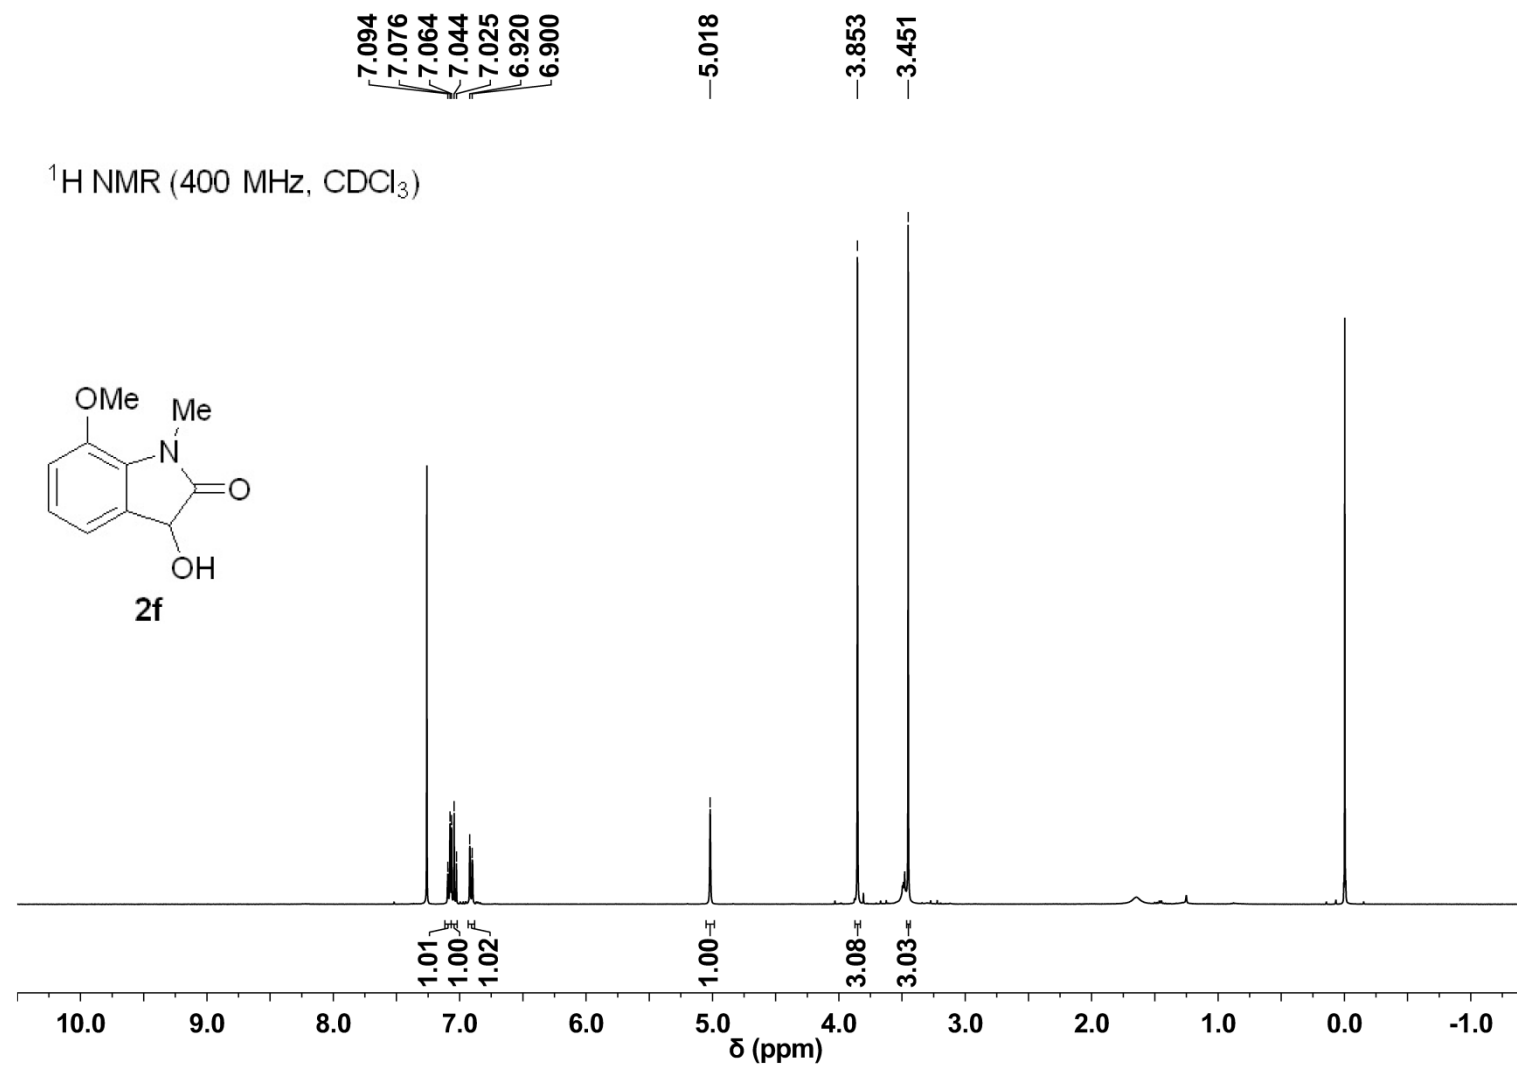

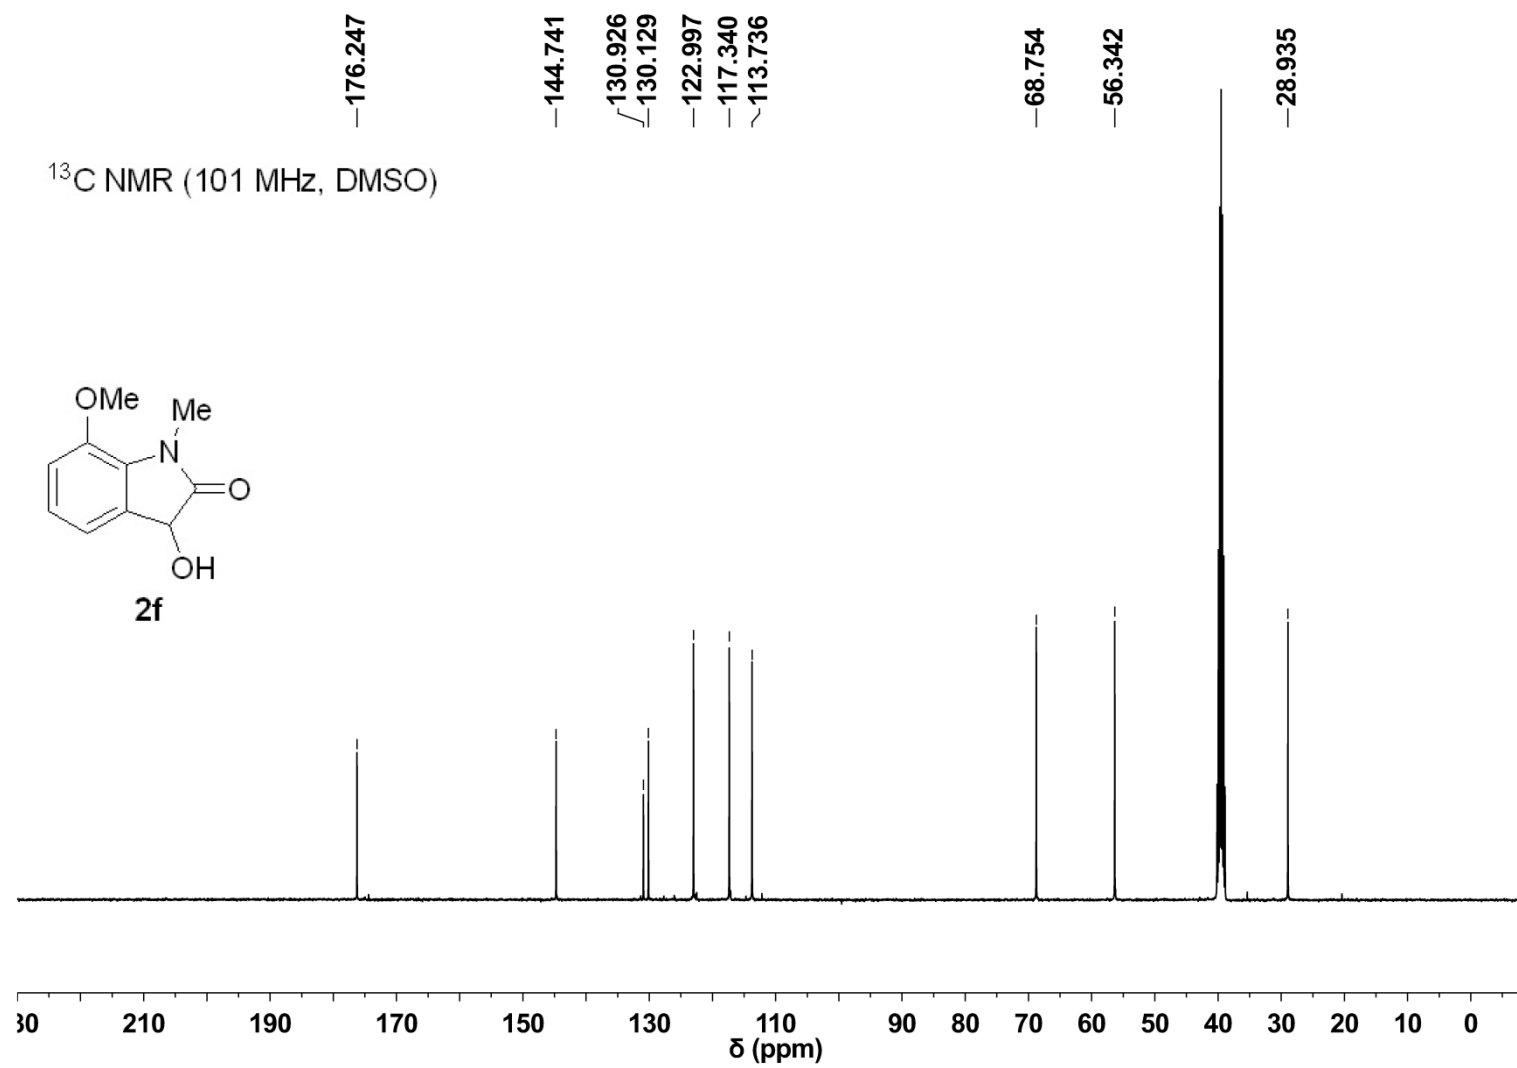



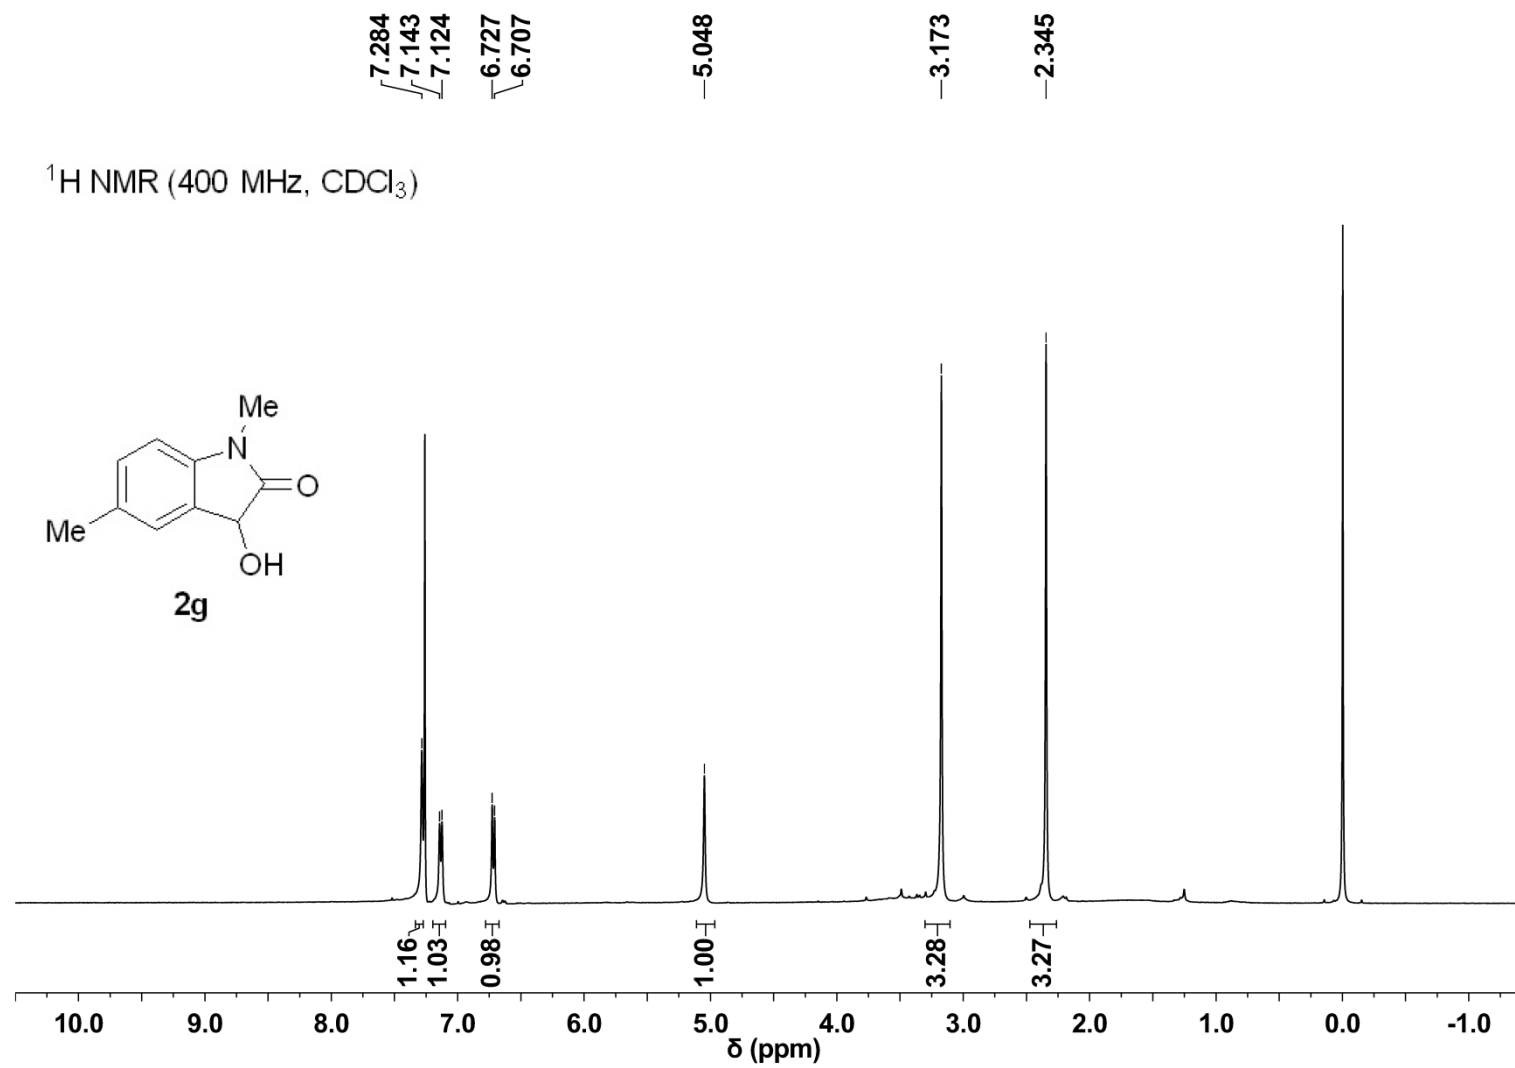

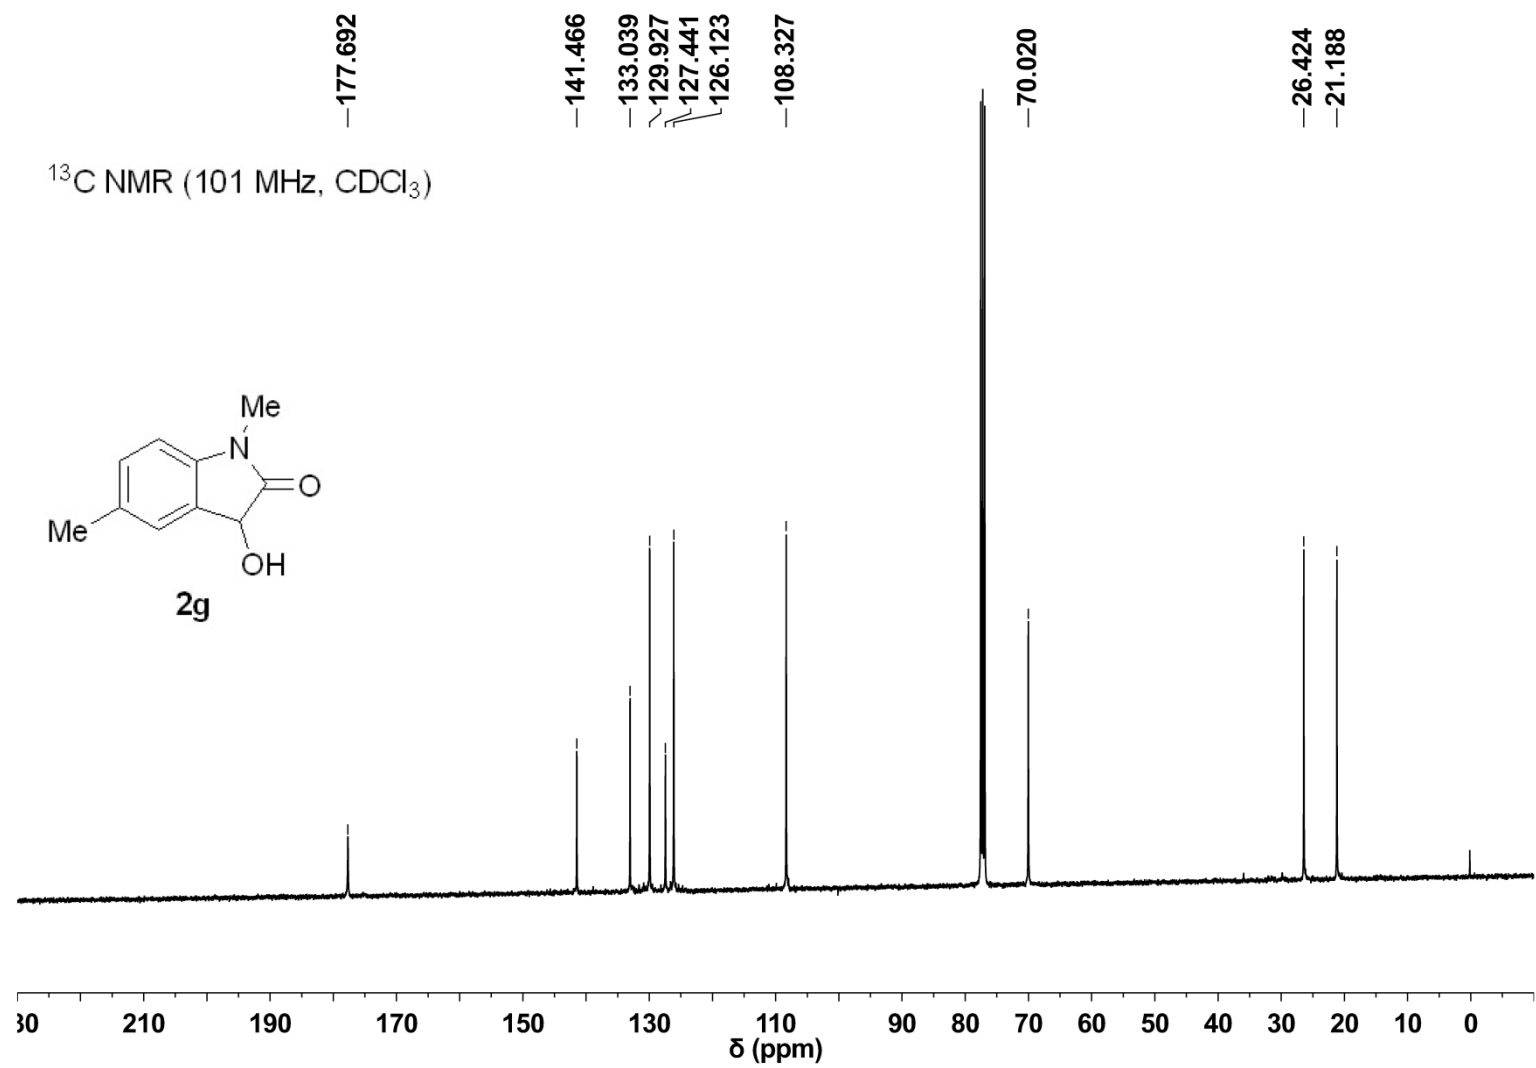

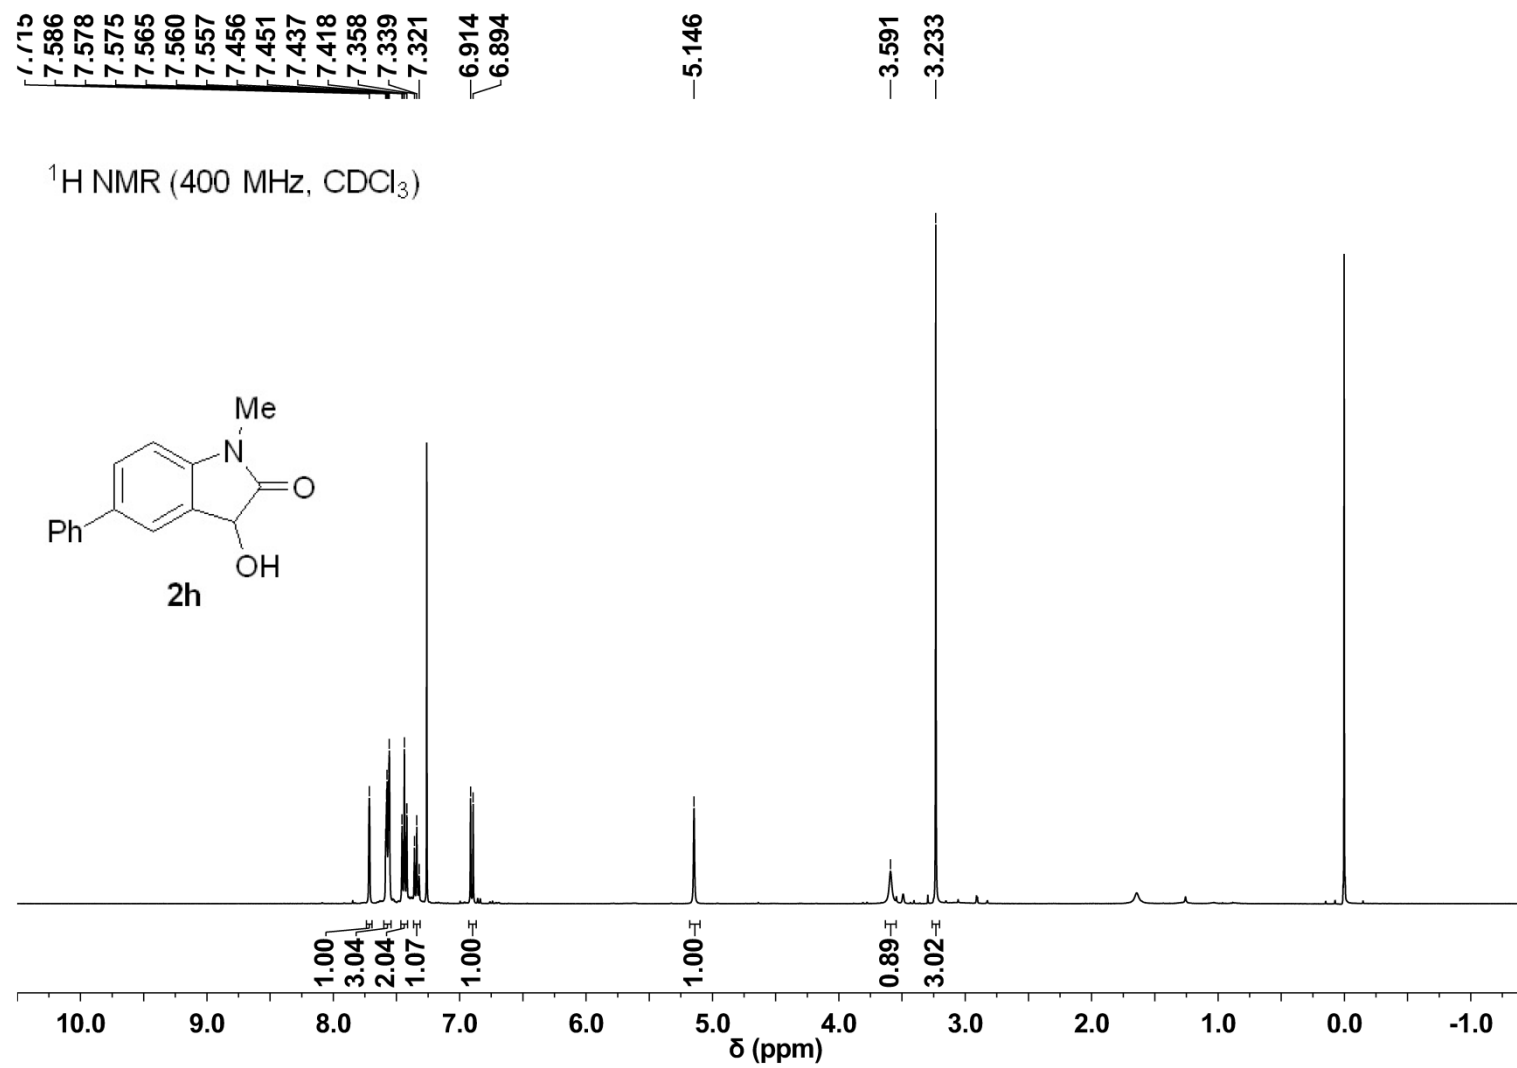

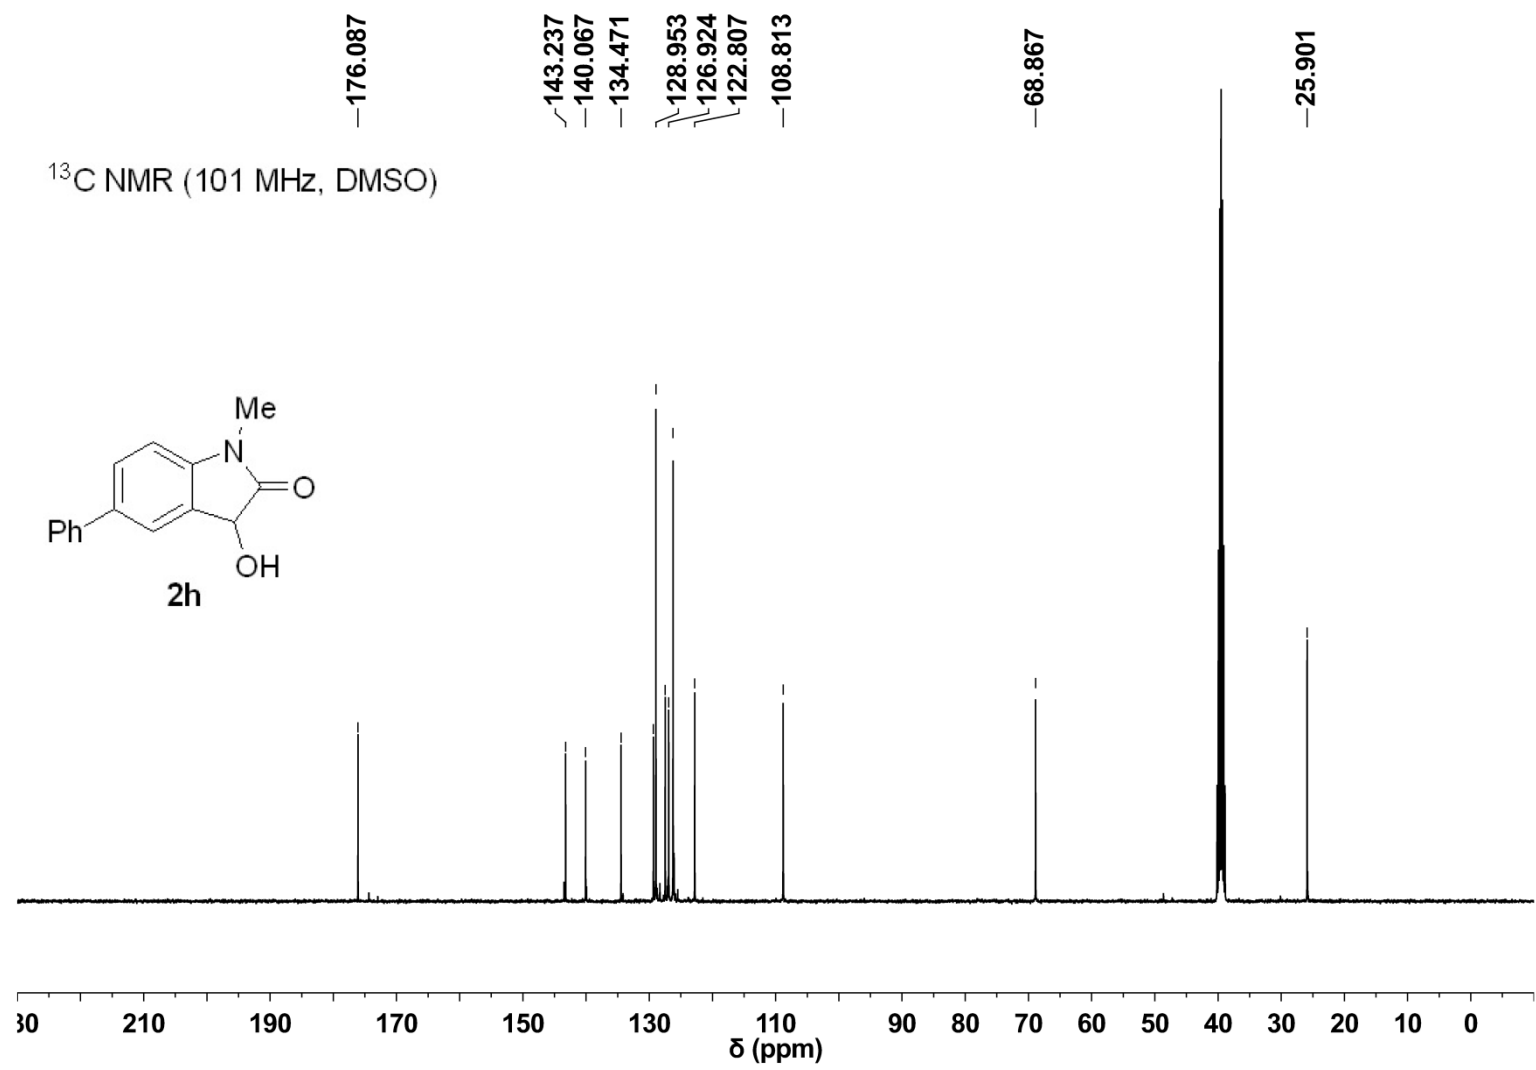

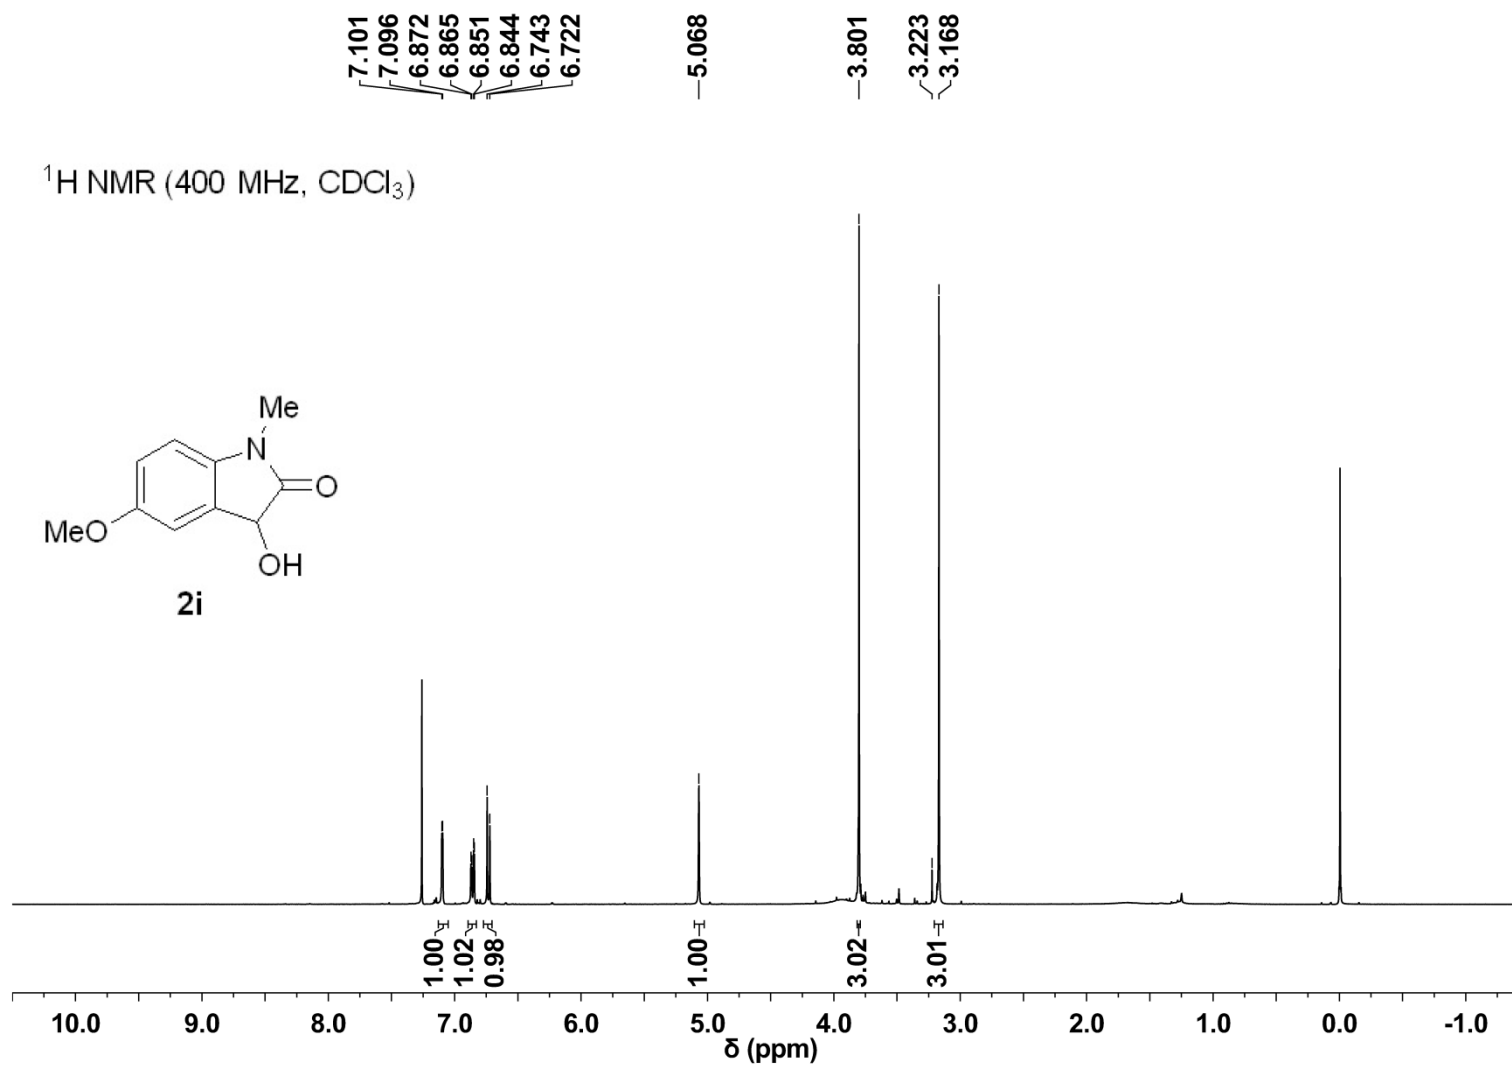

c

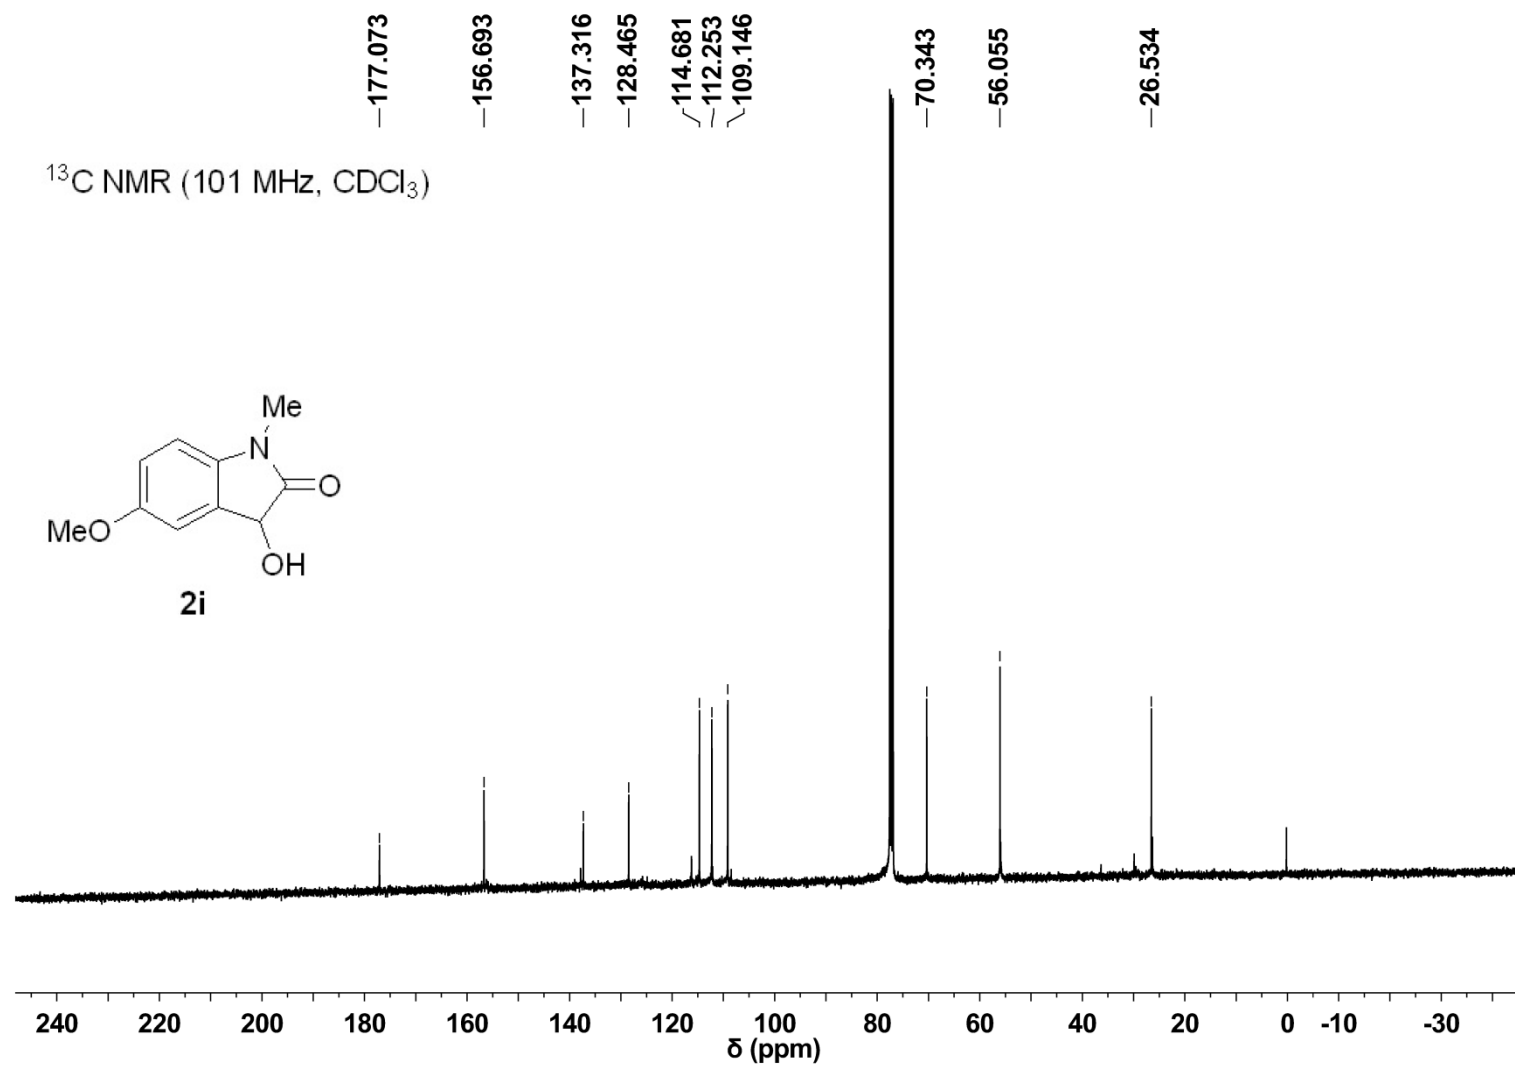

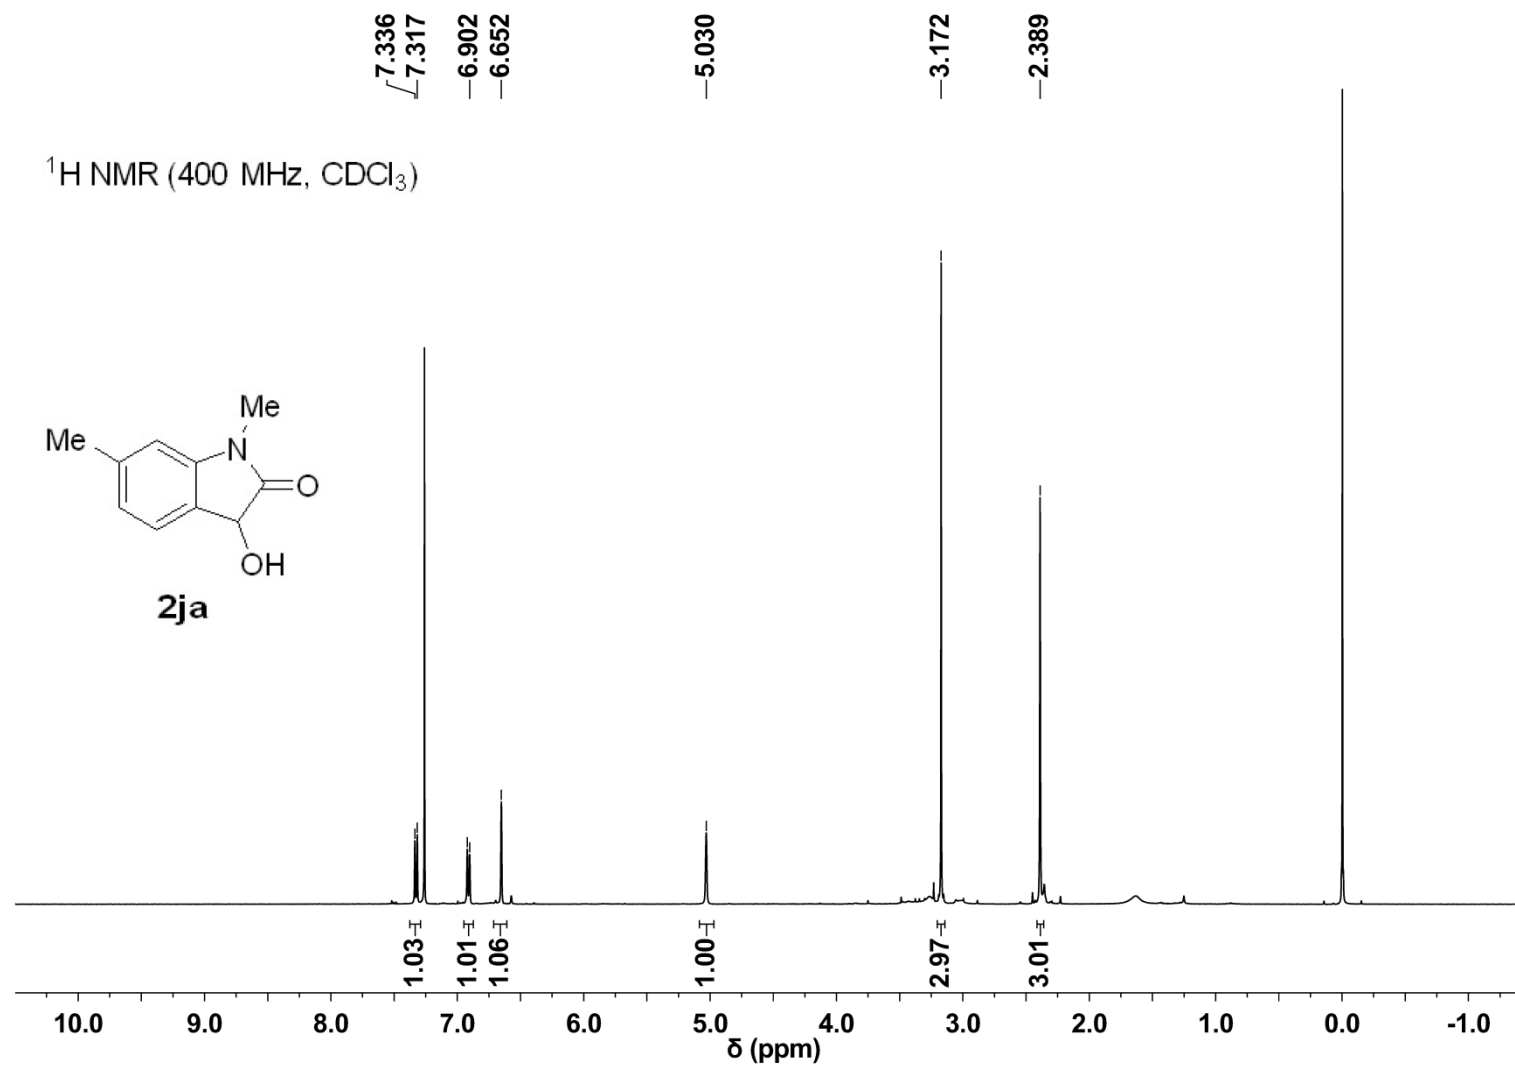

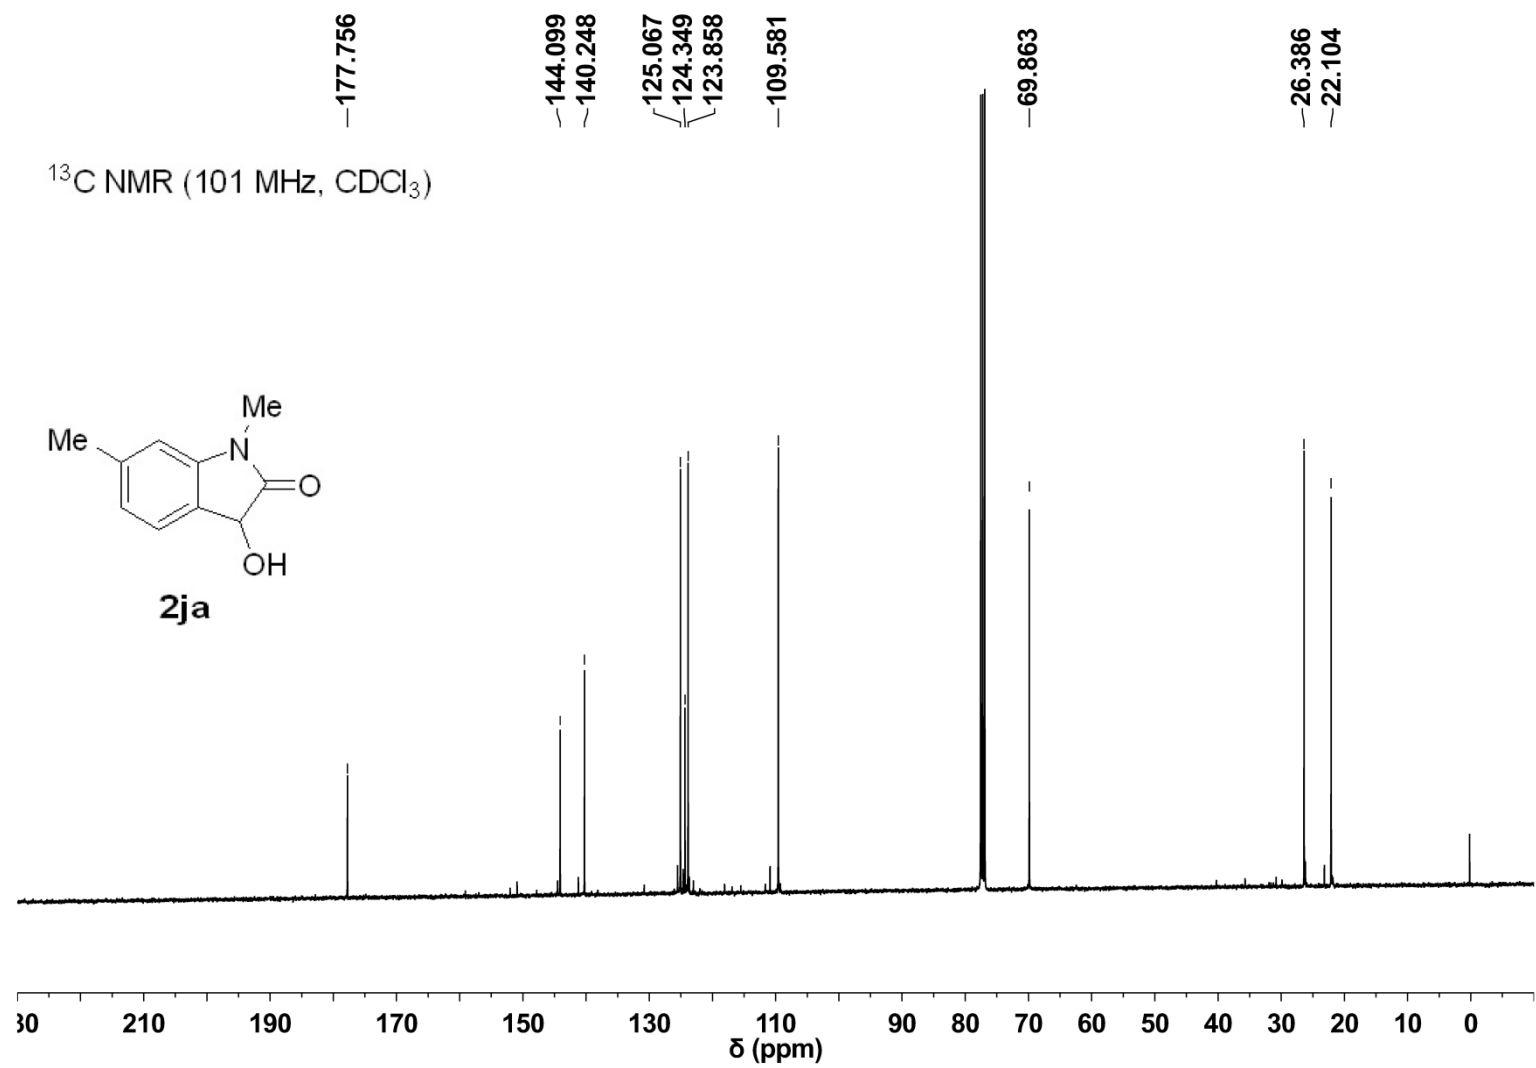



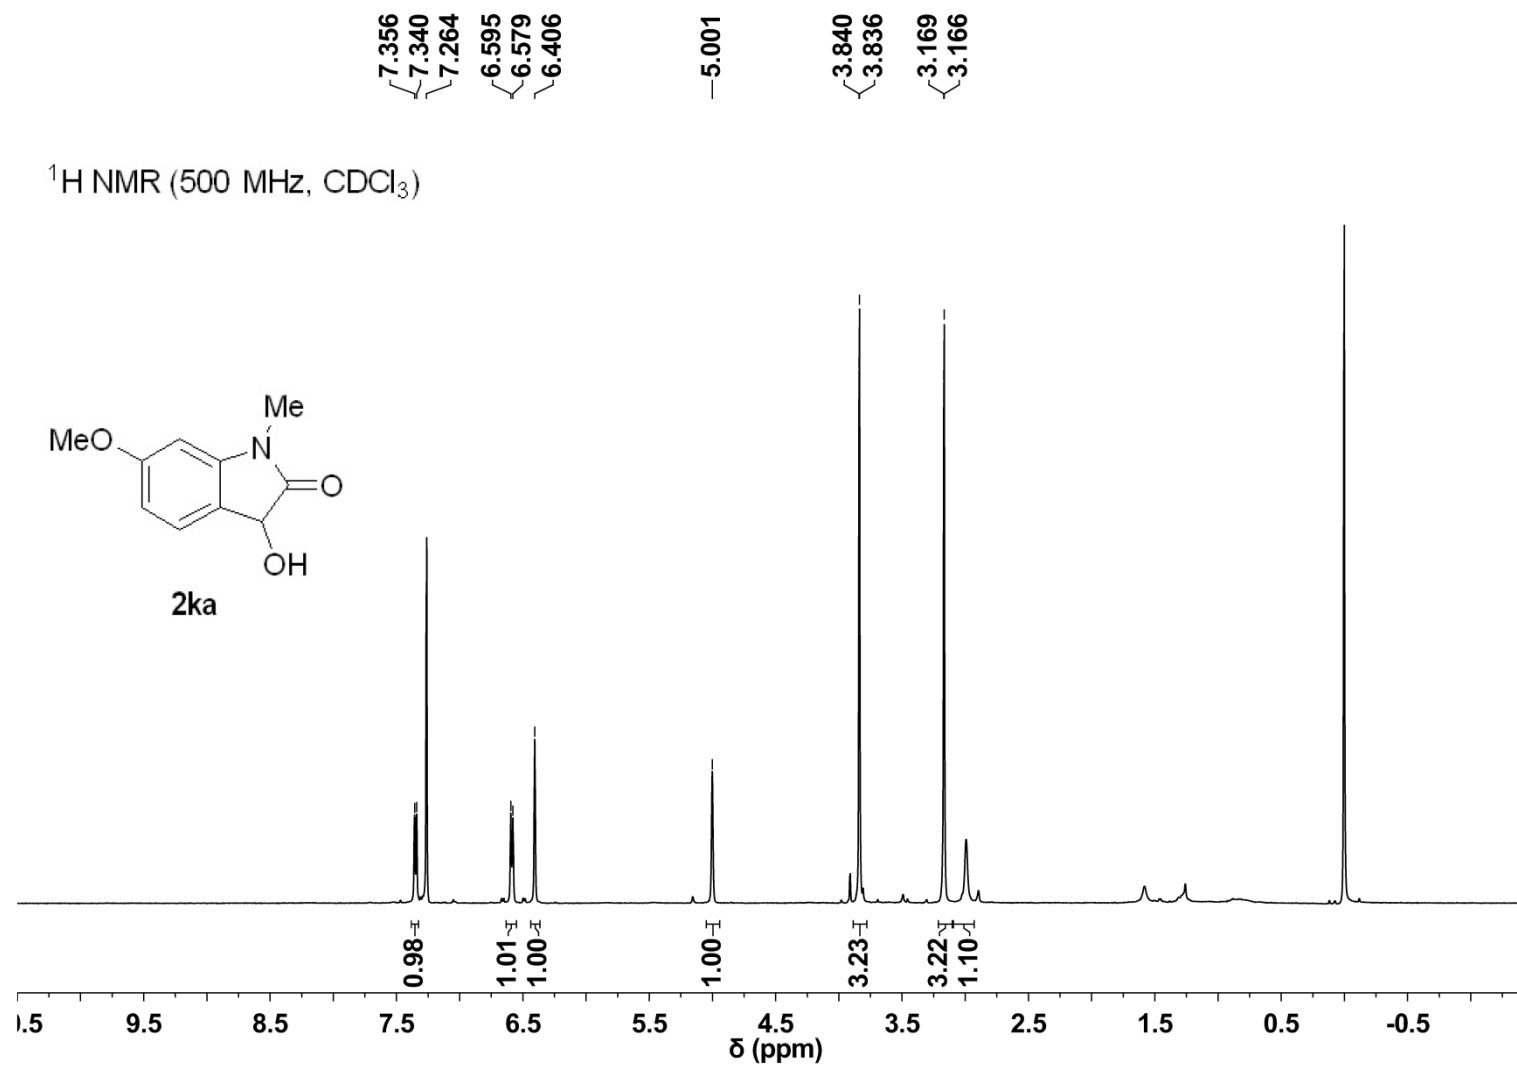

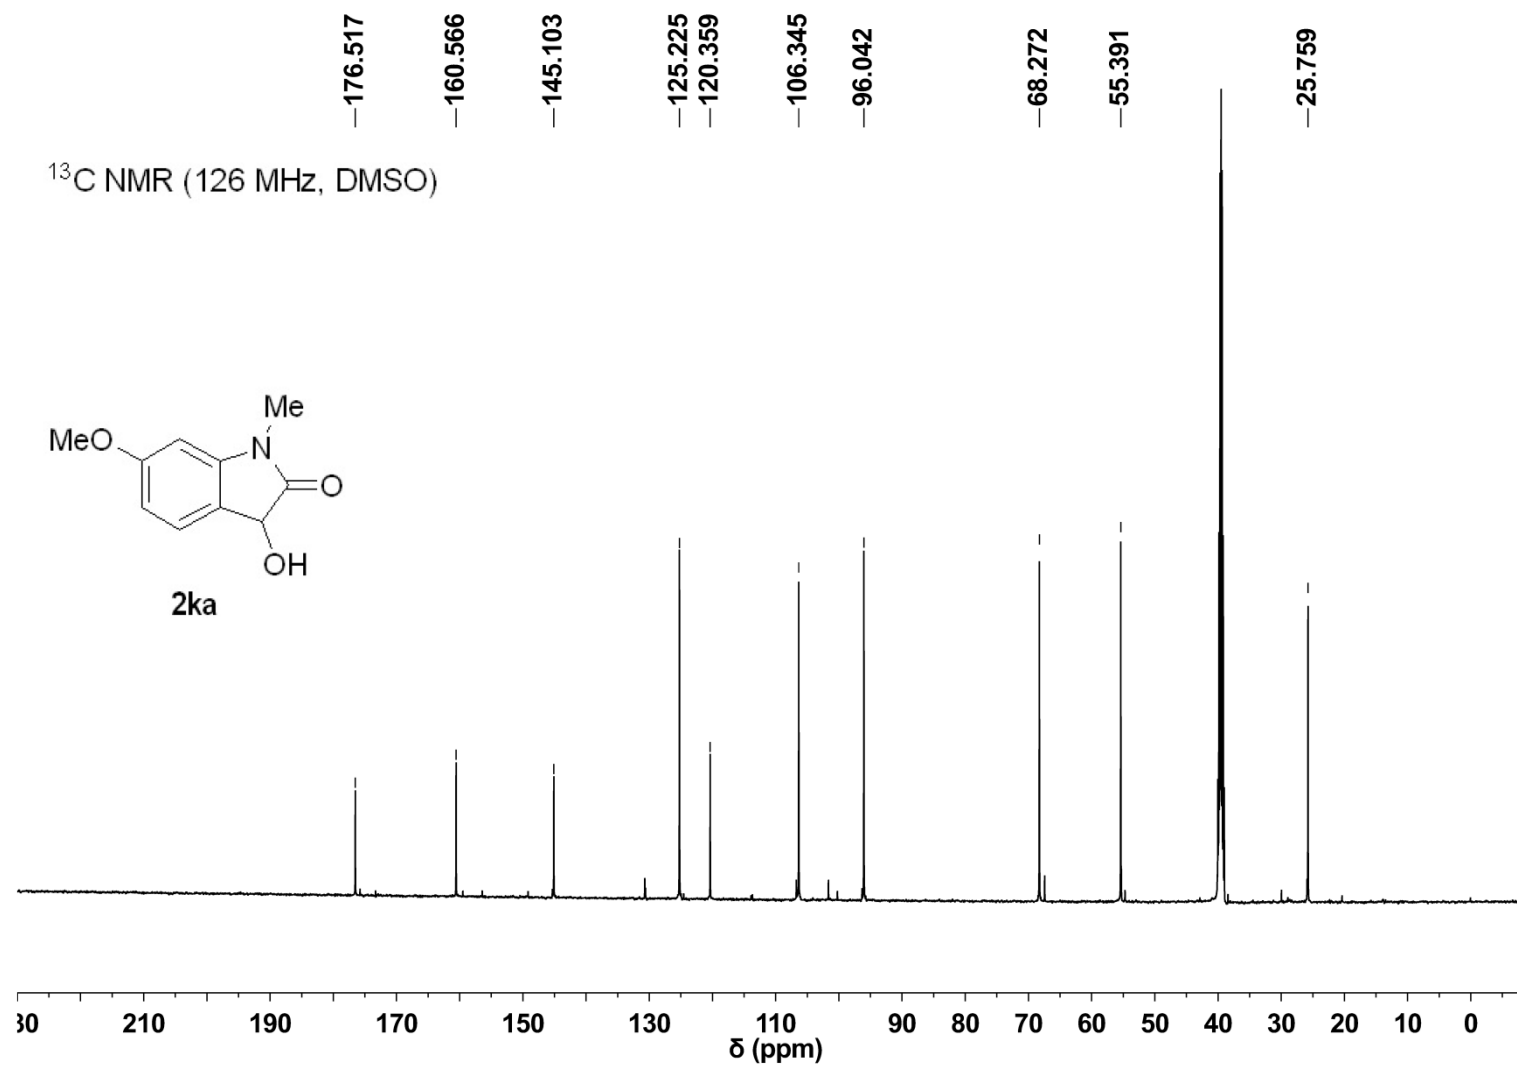

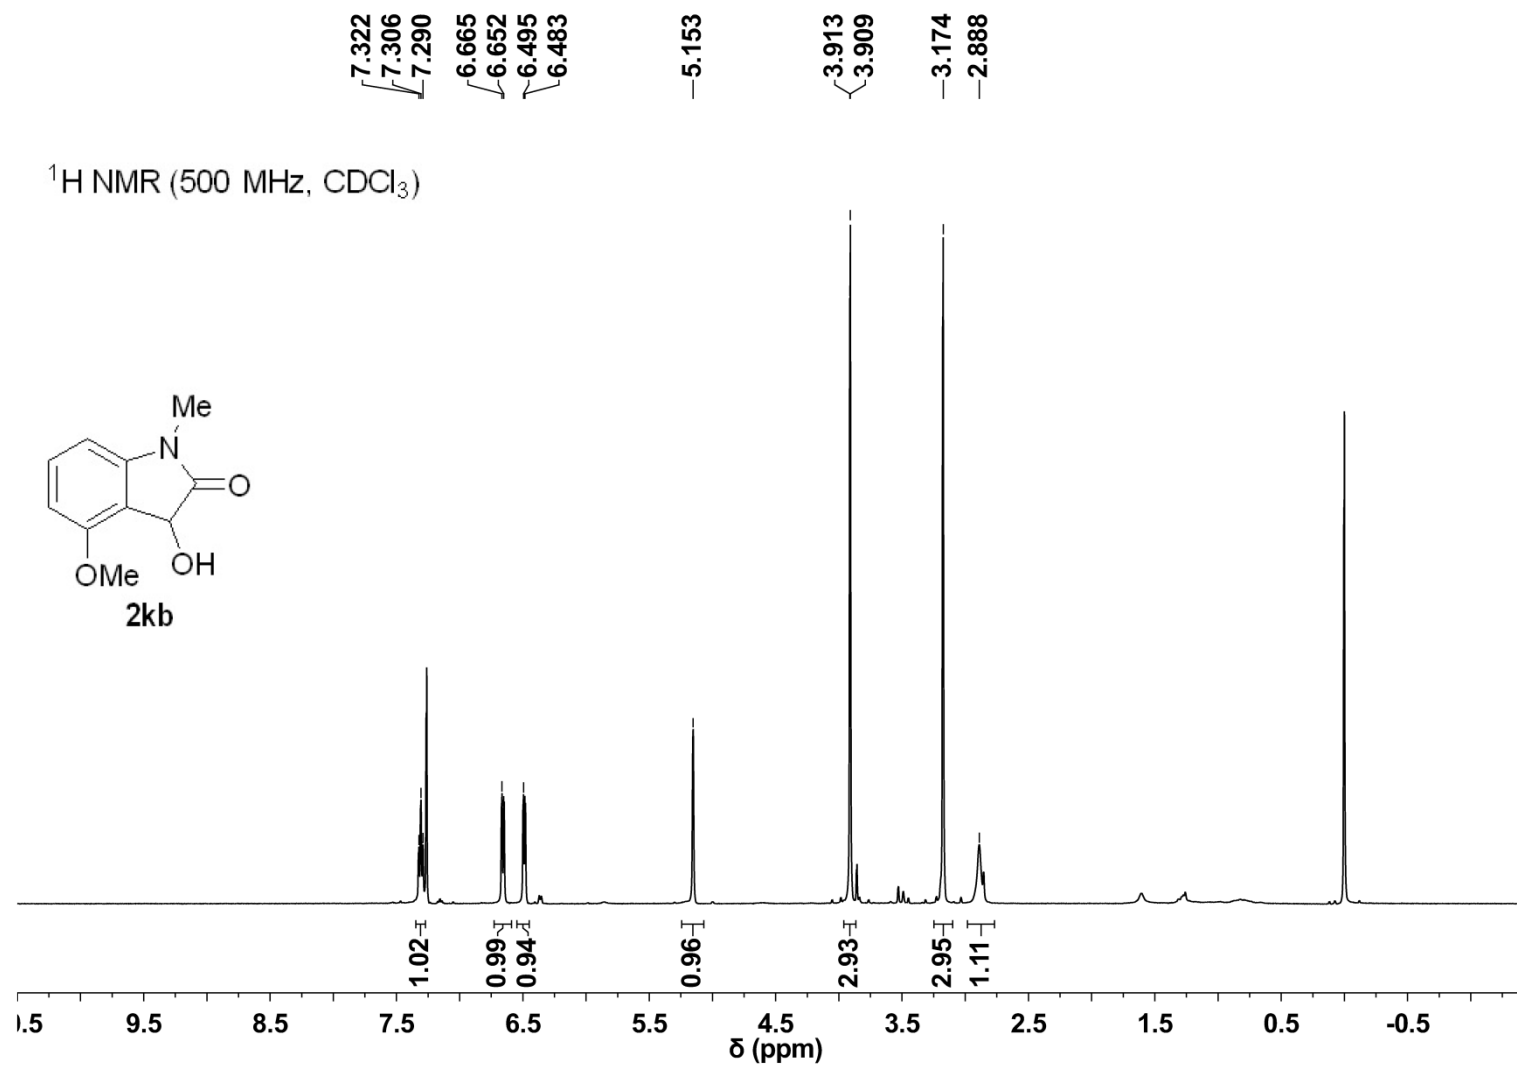

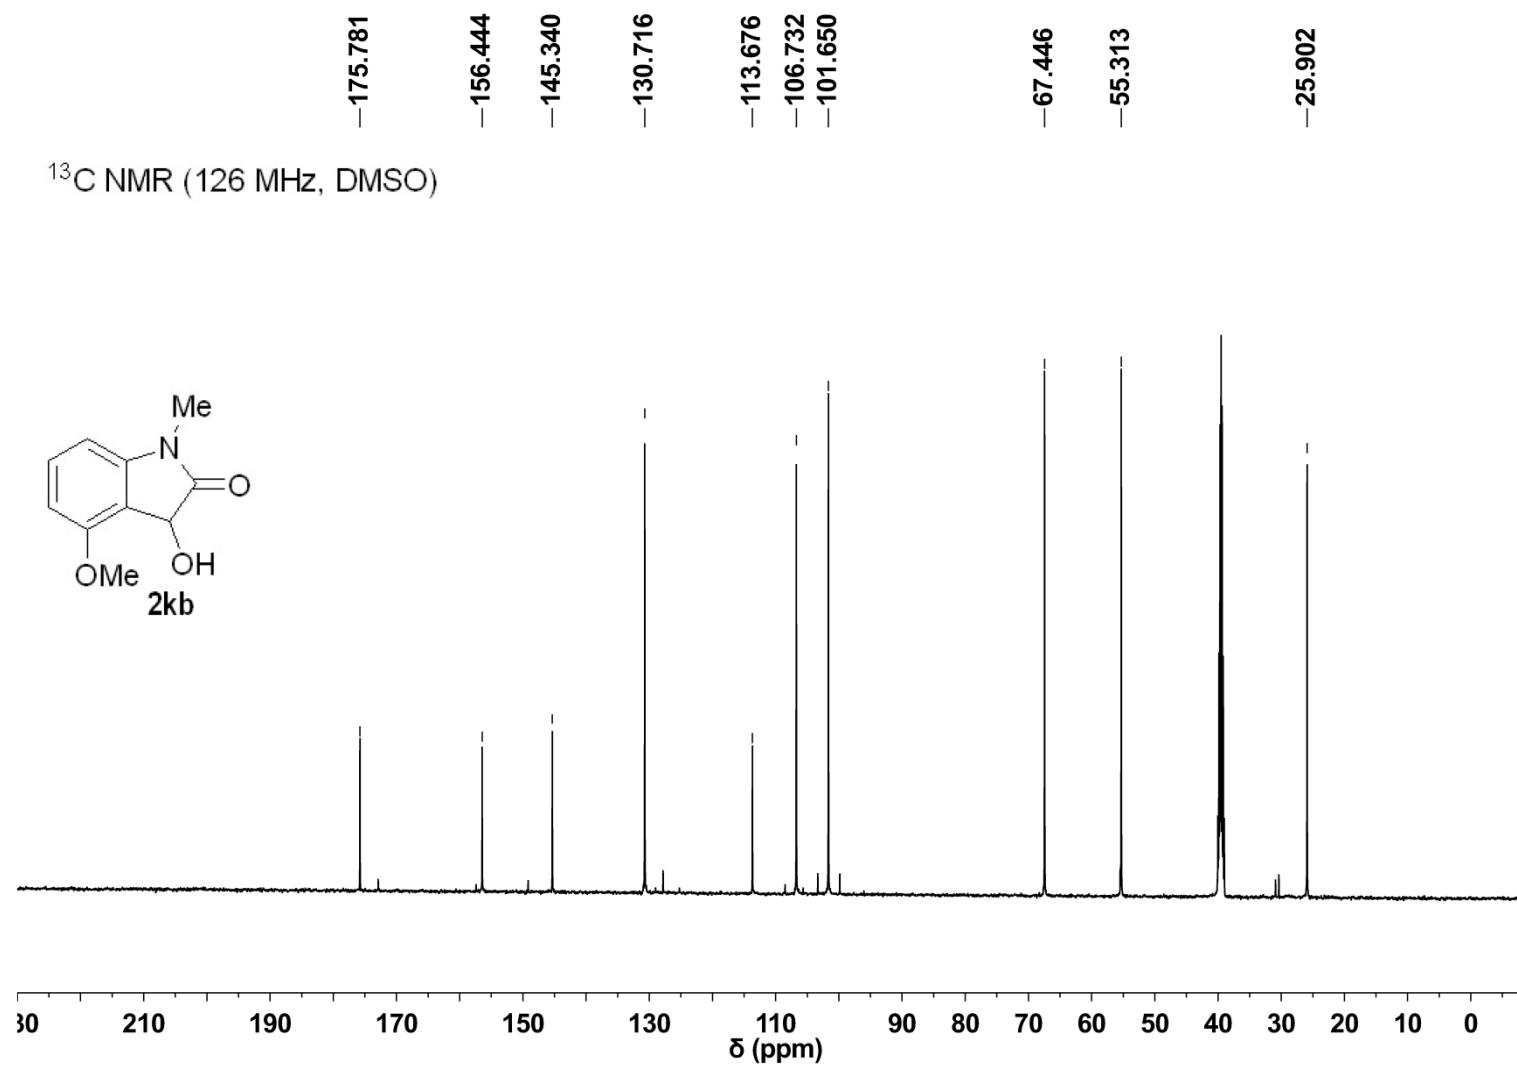

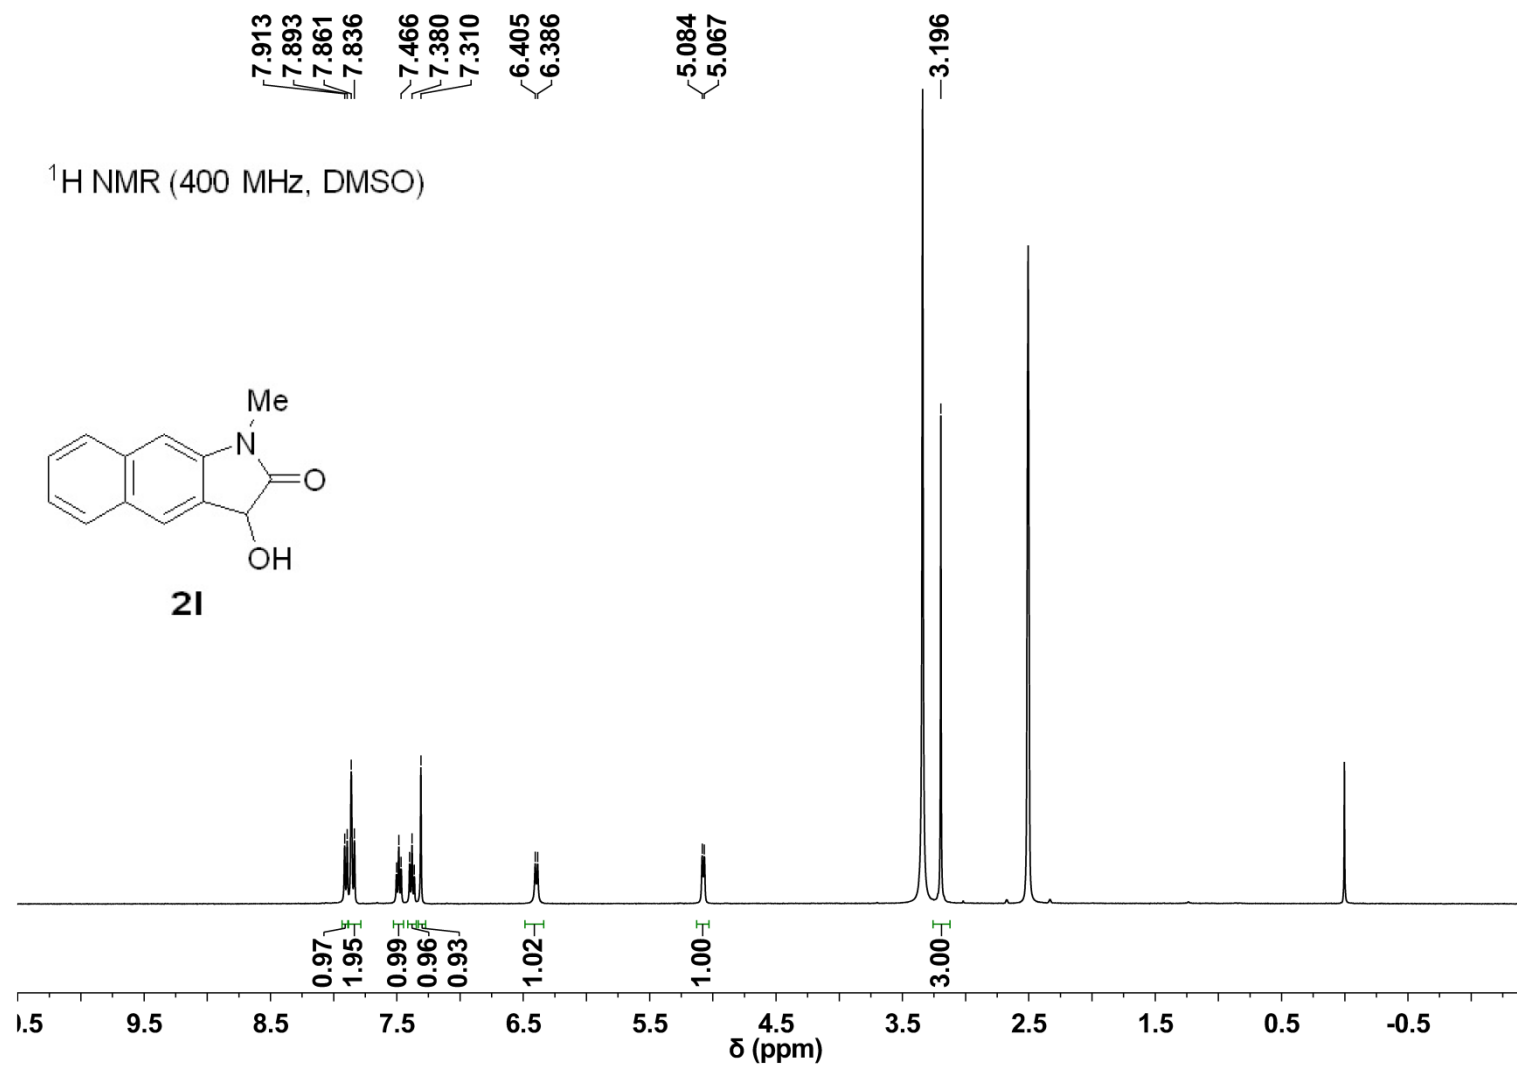

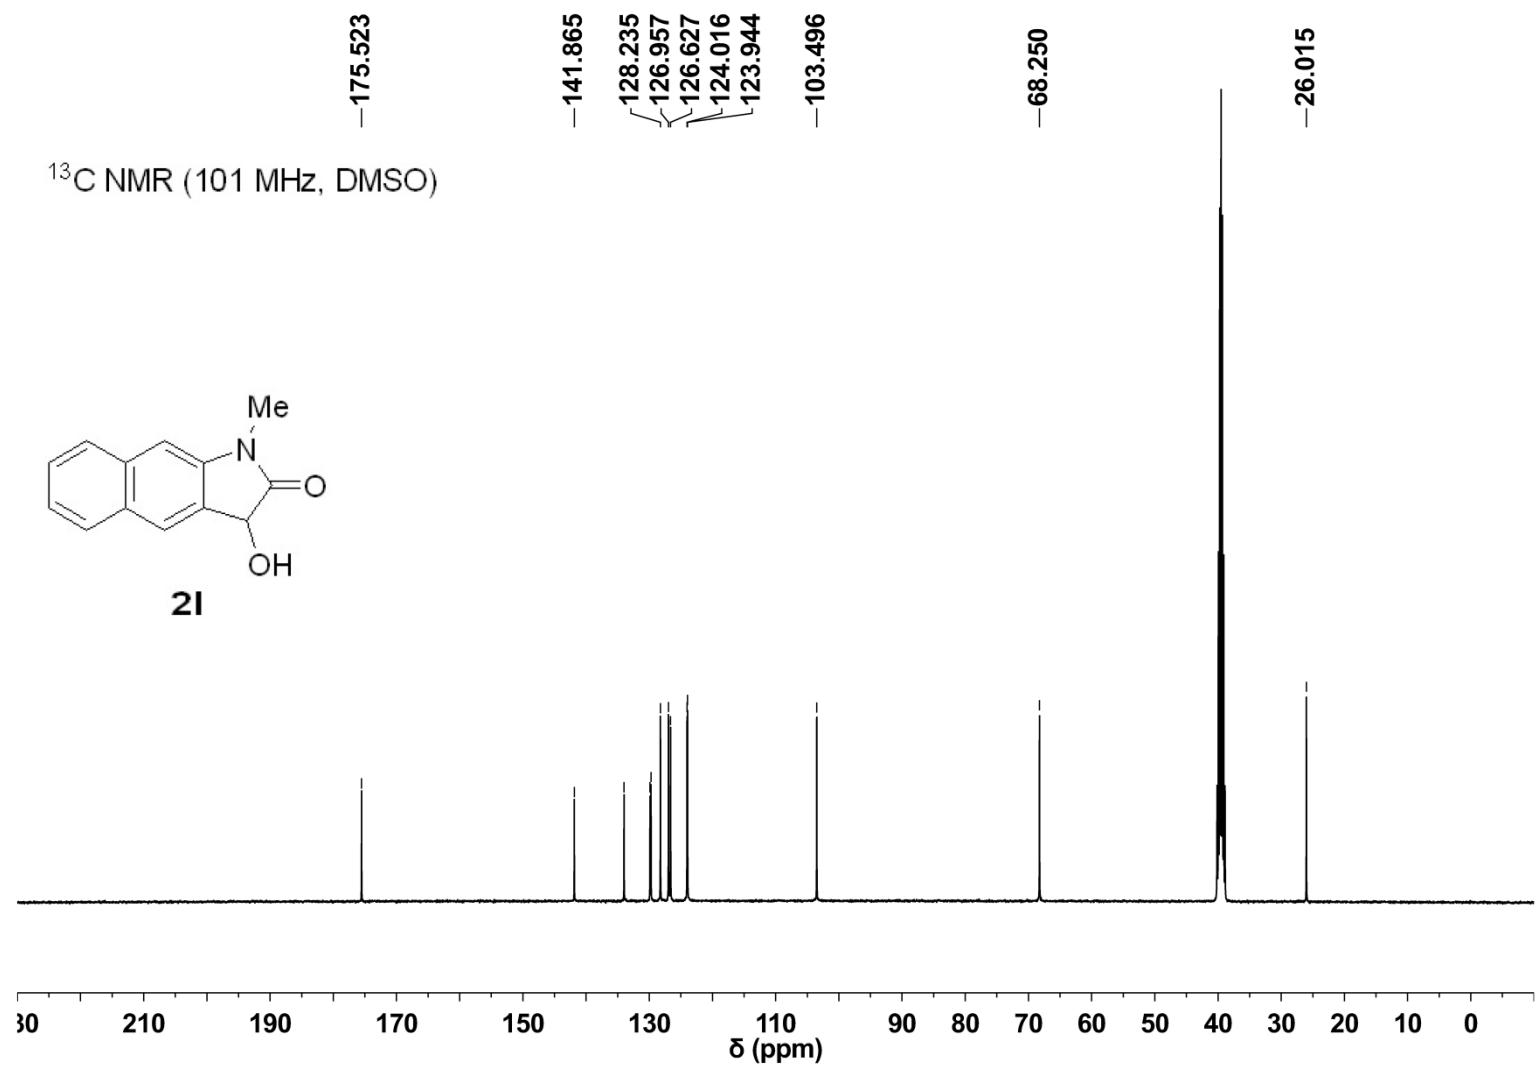

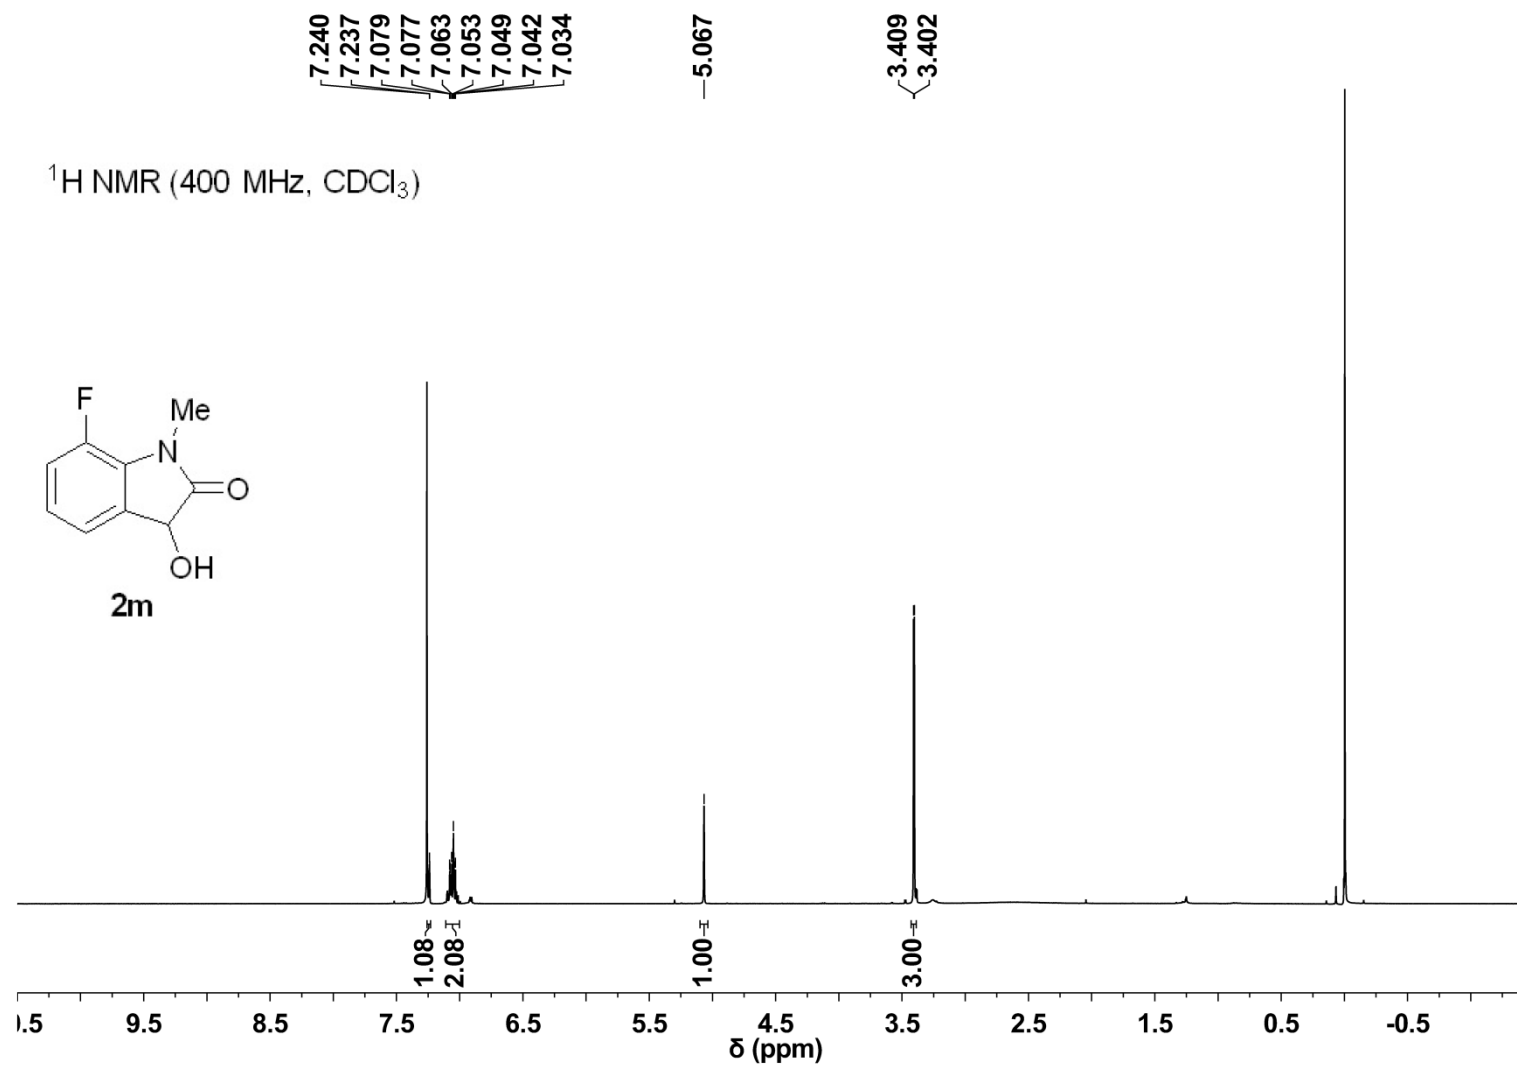

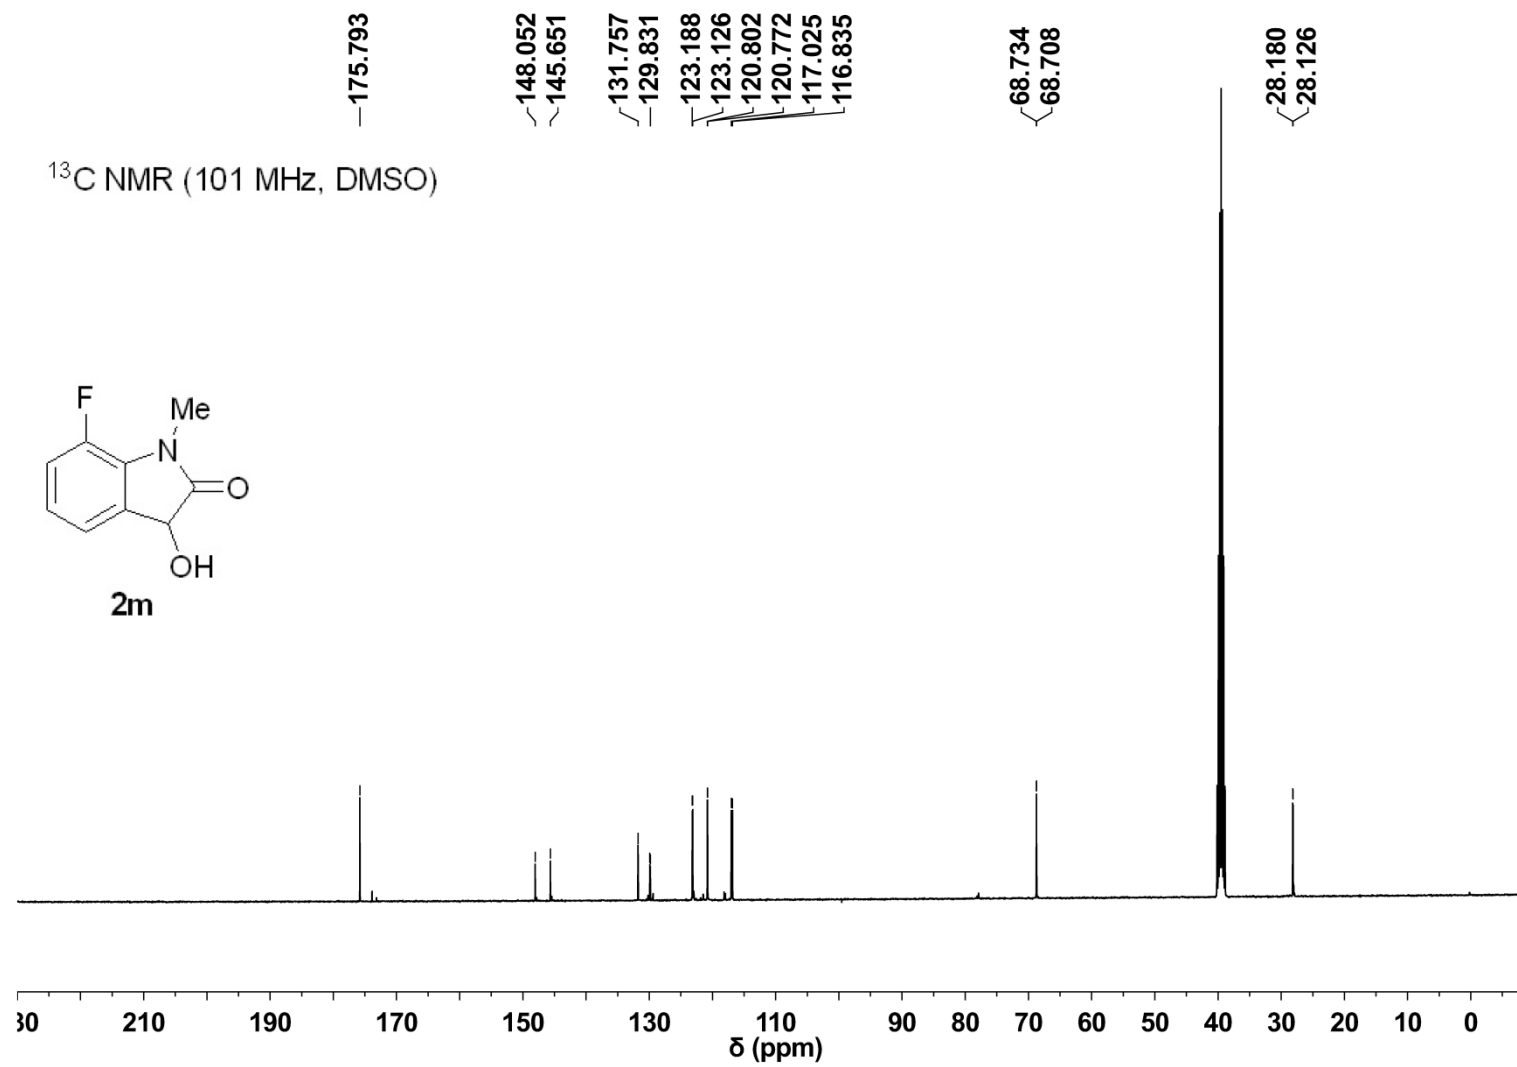



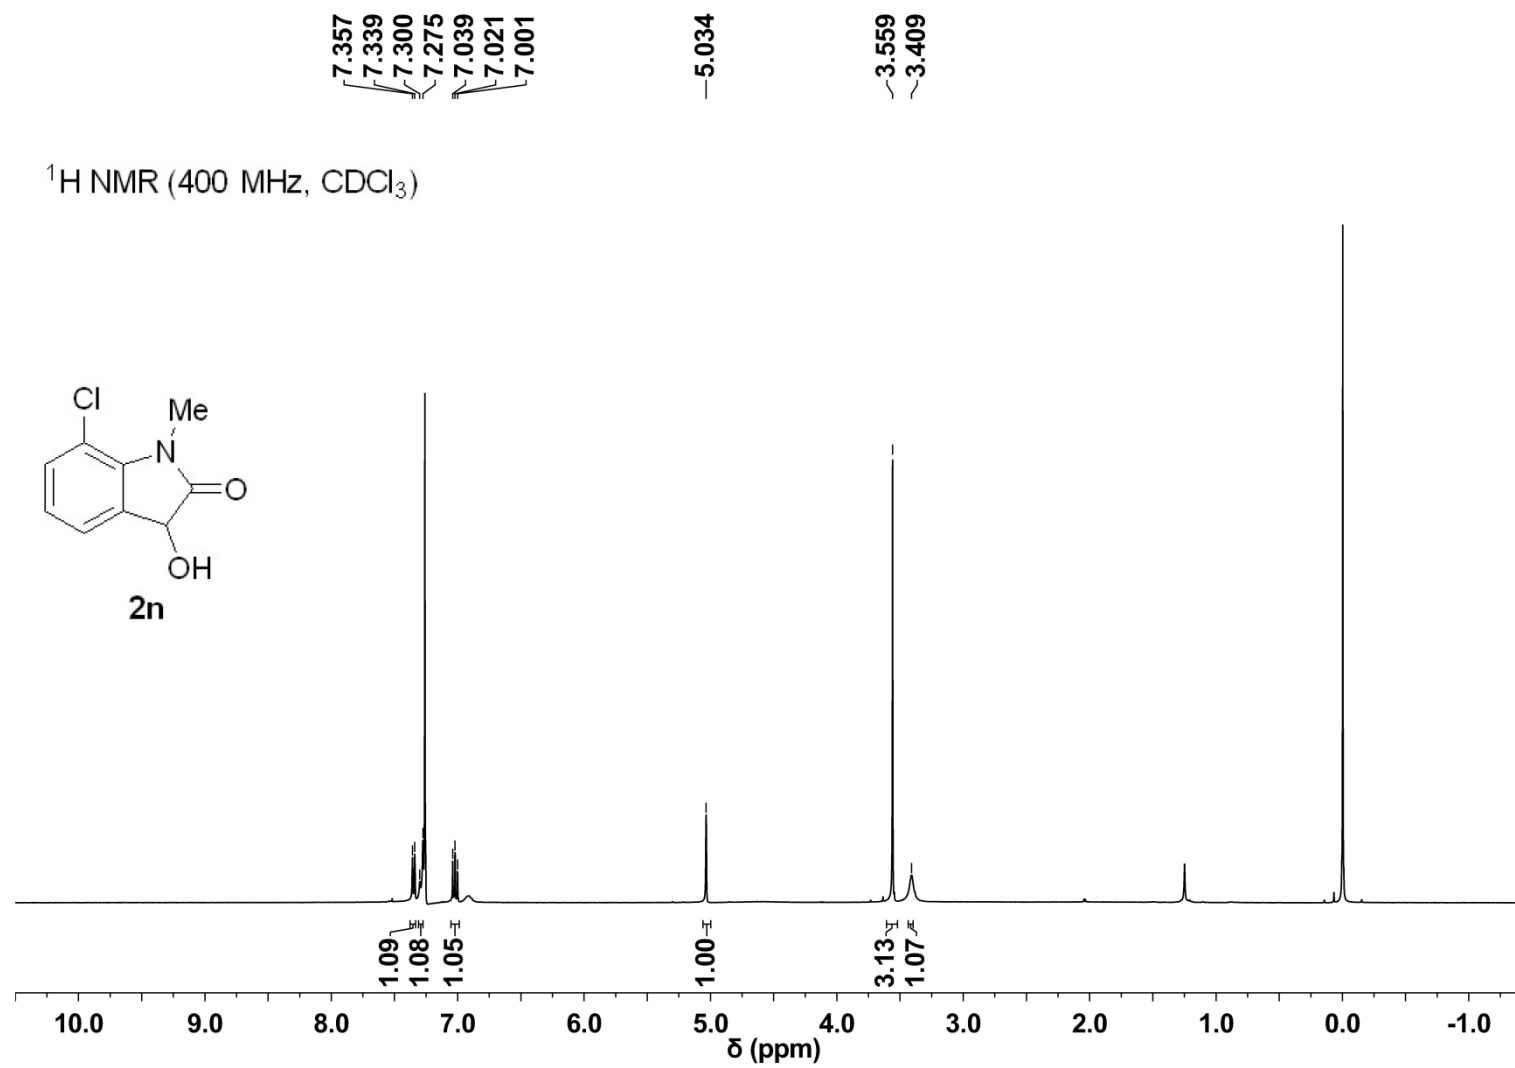

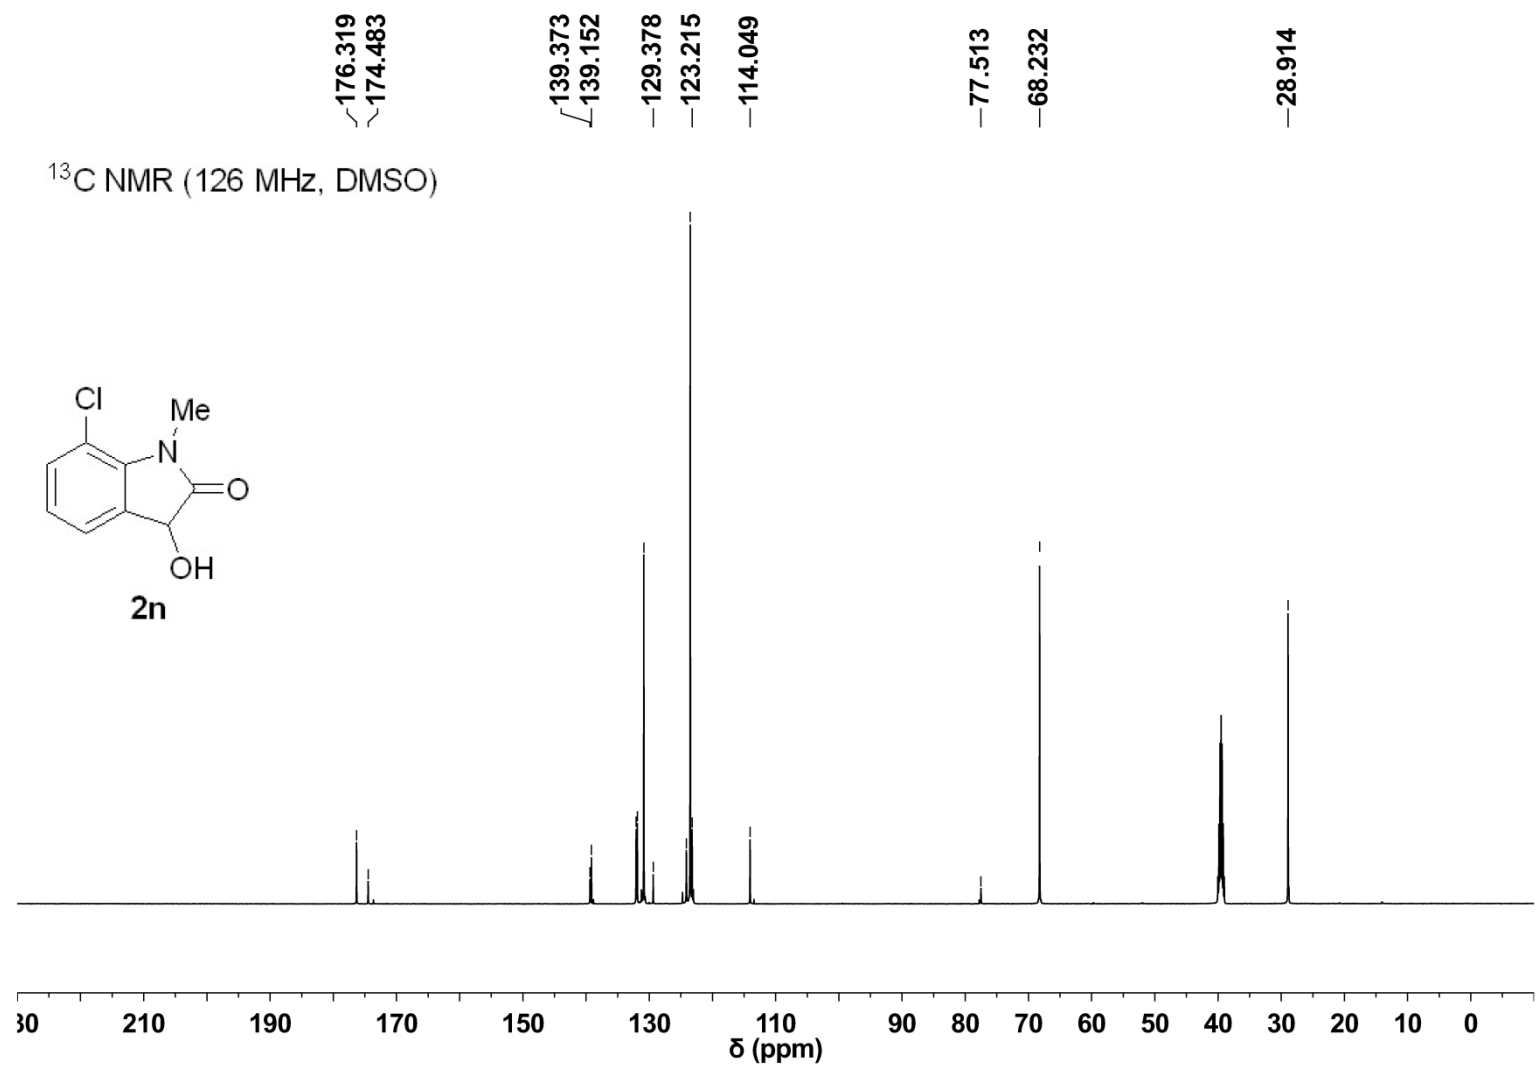

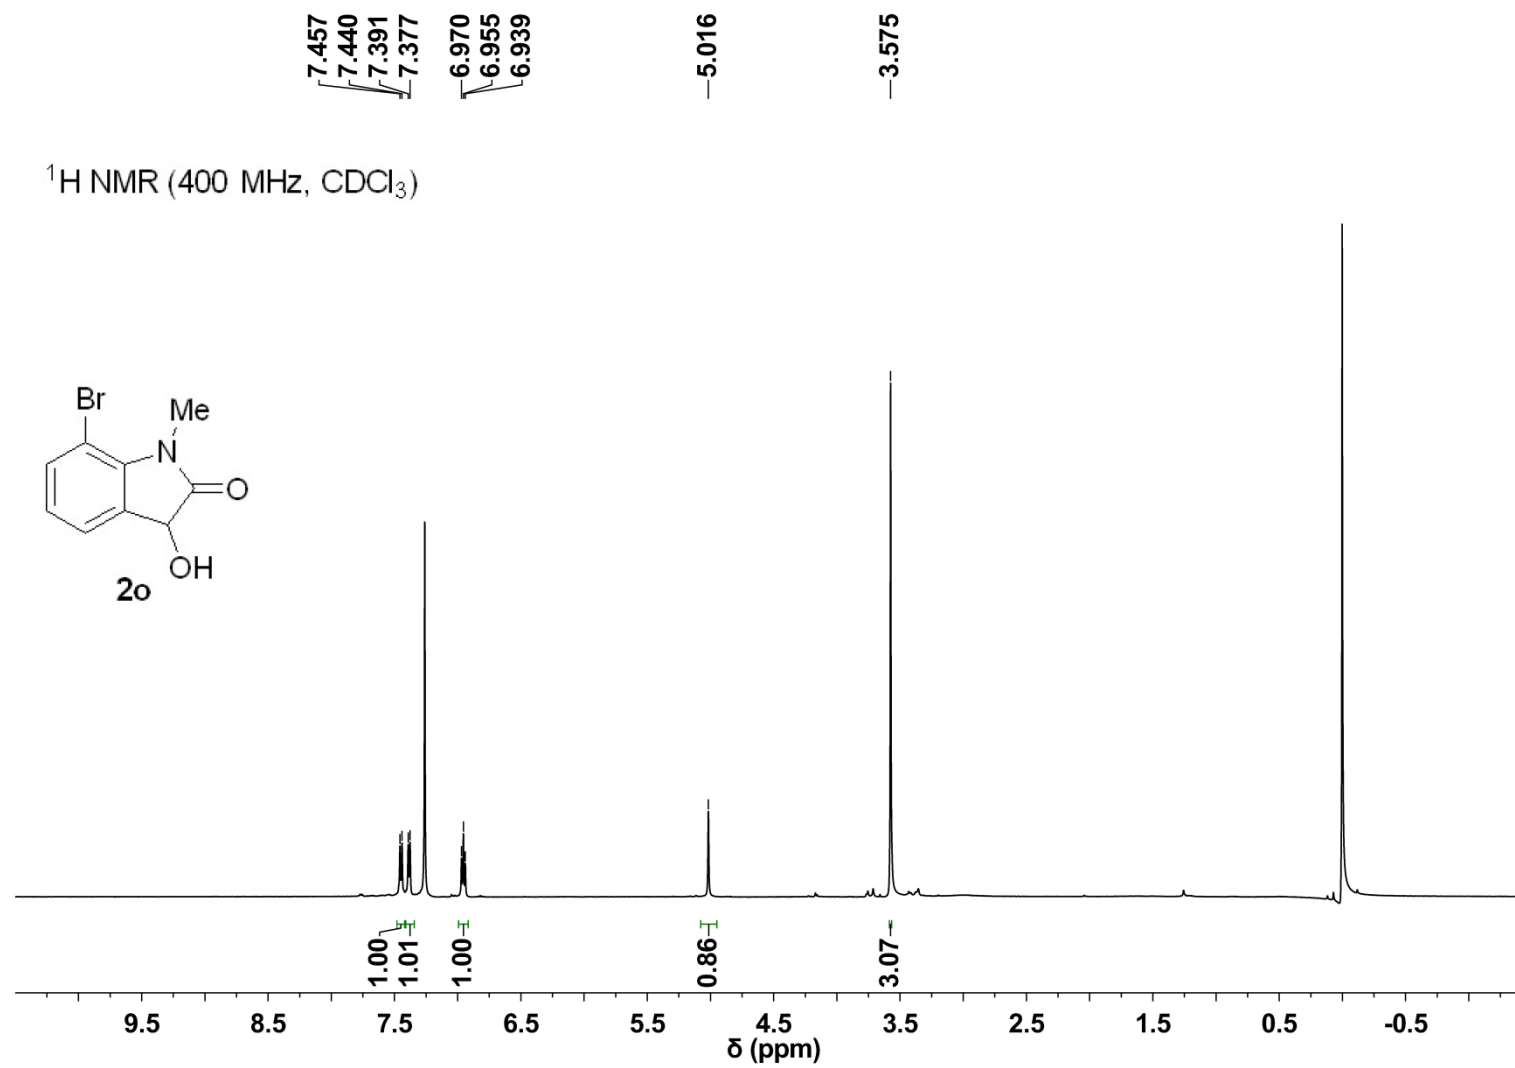

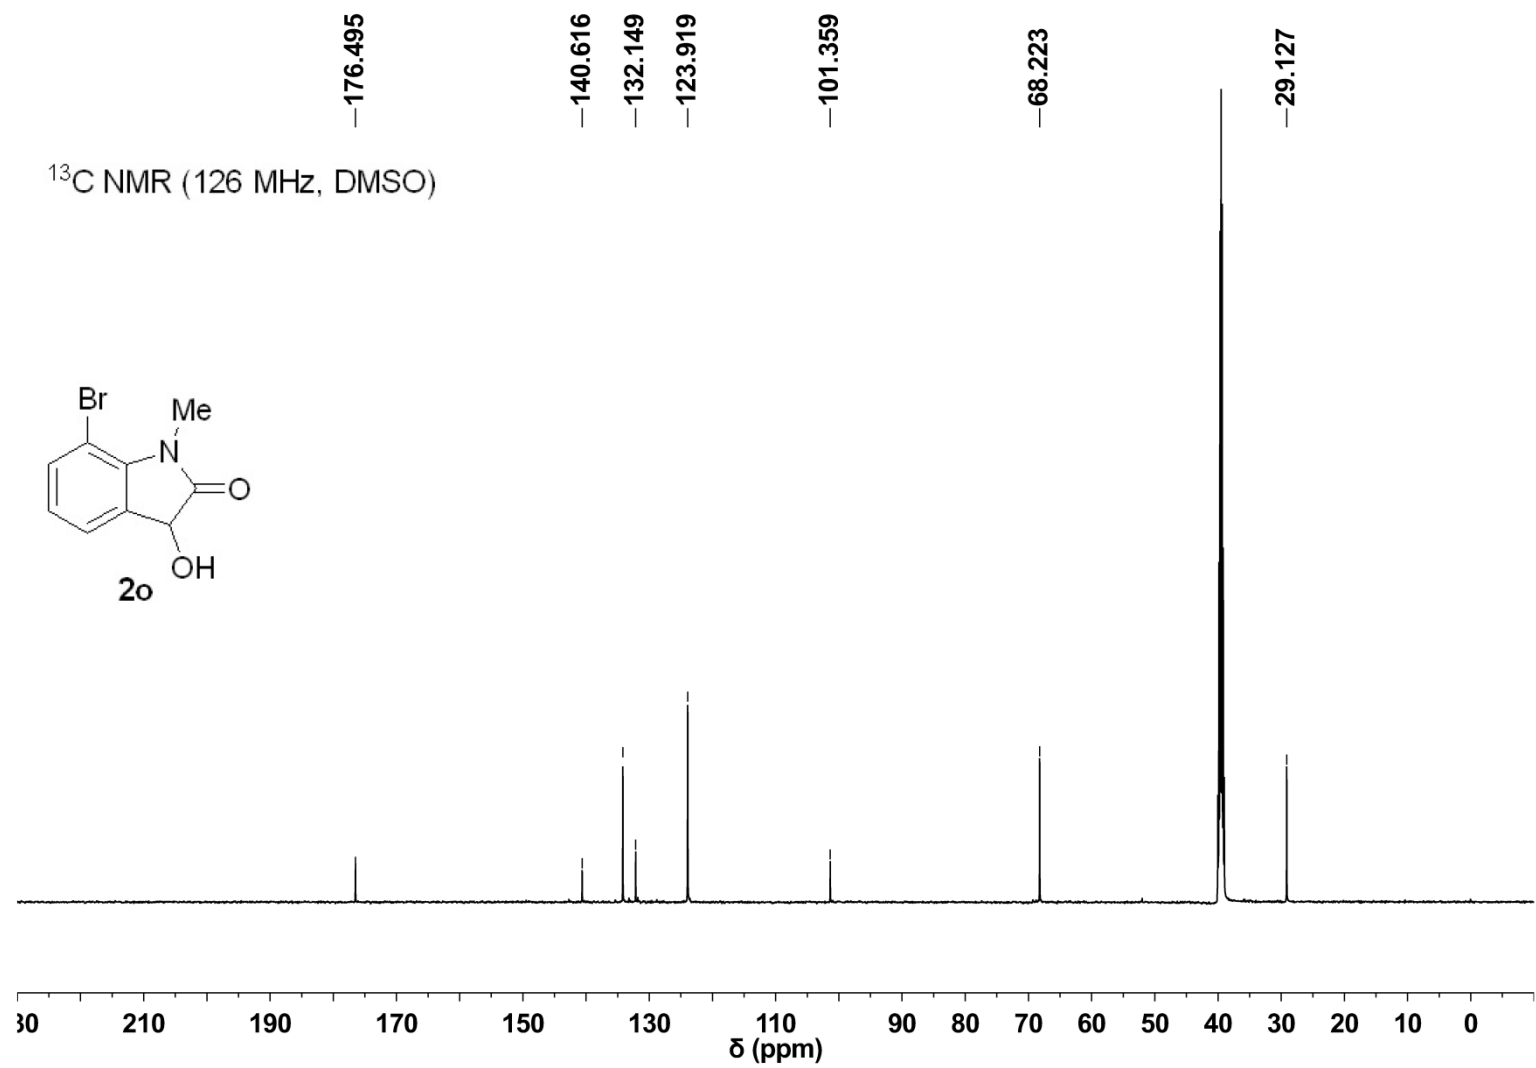

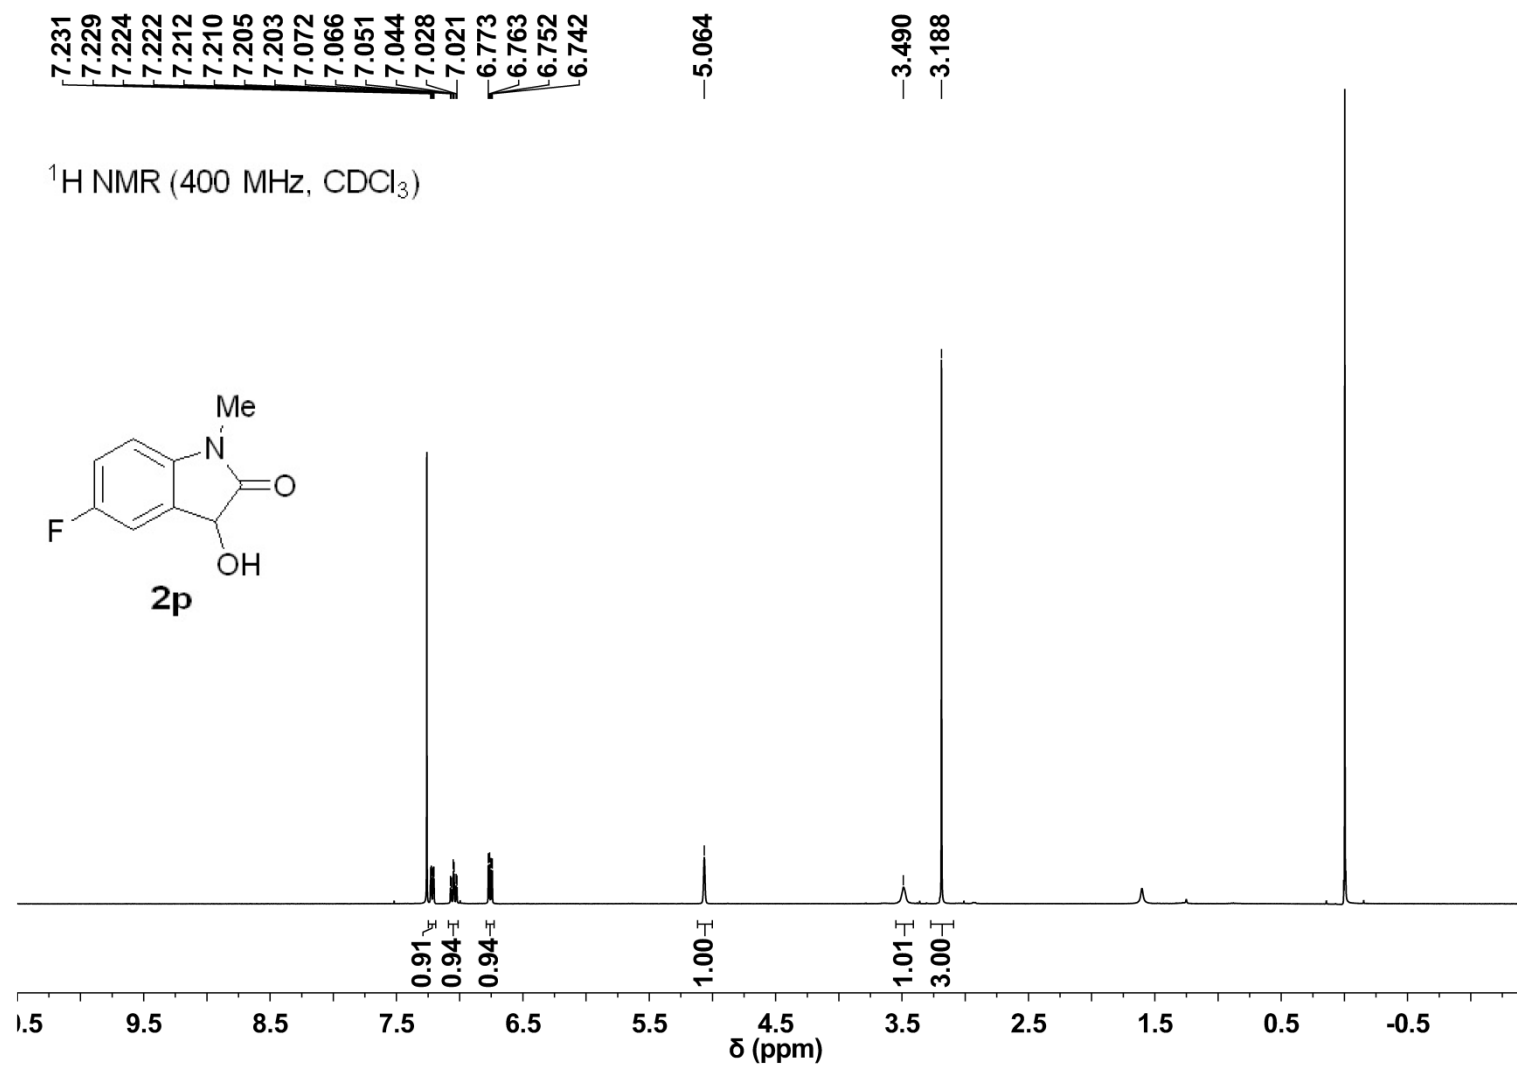

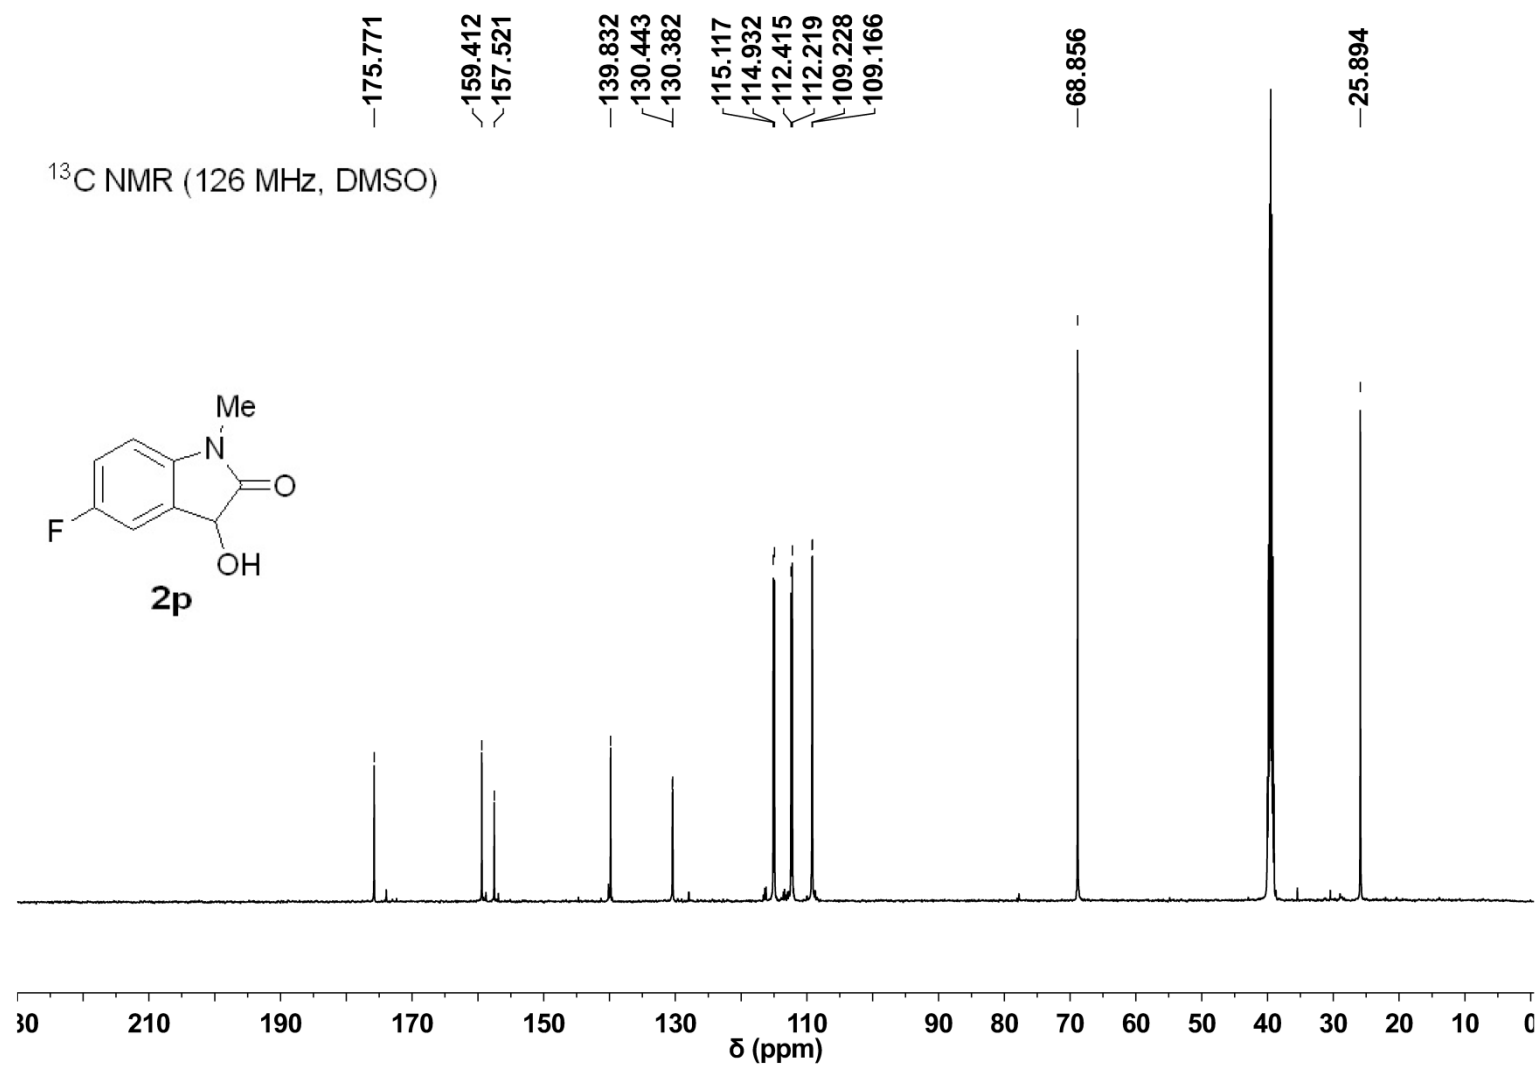

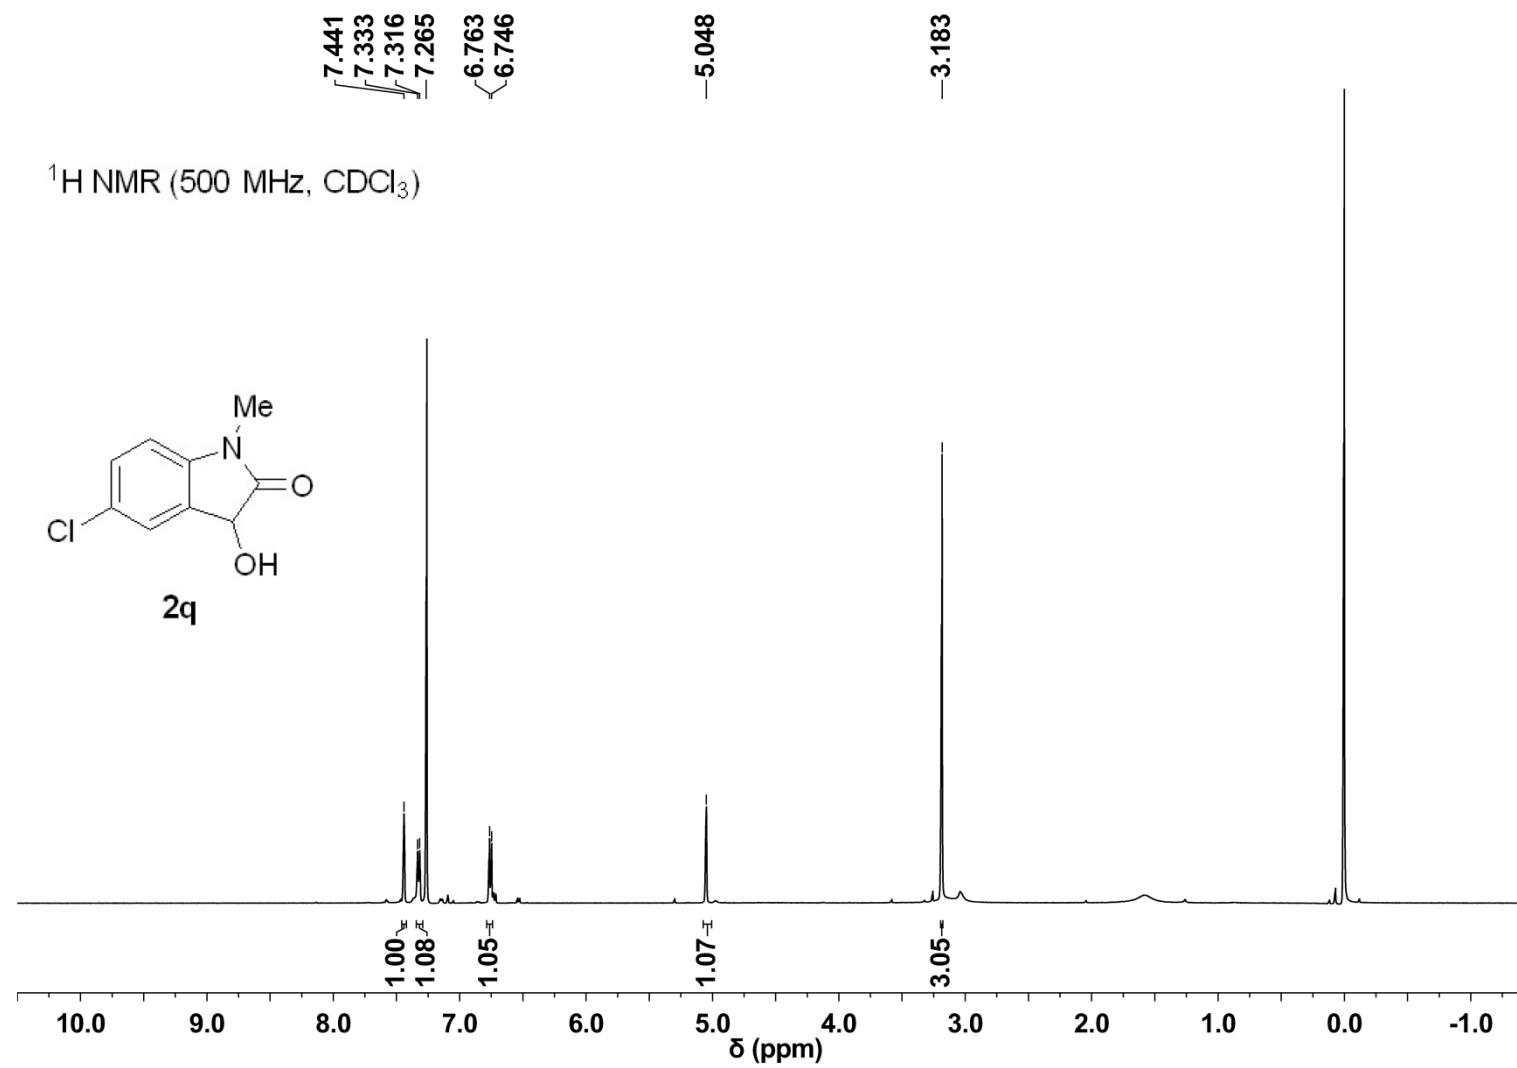

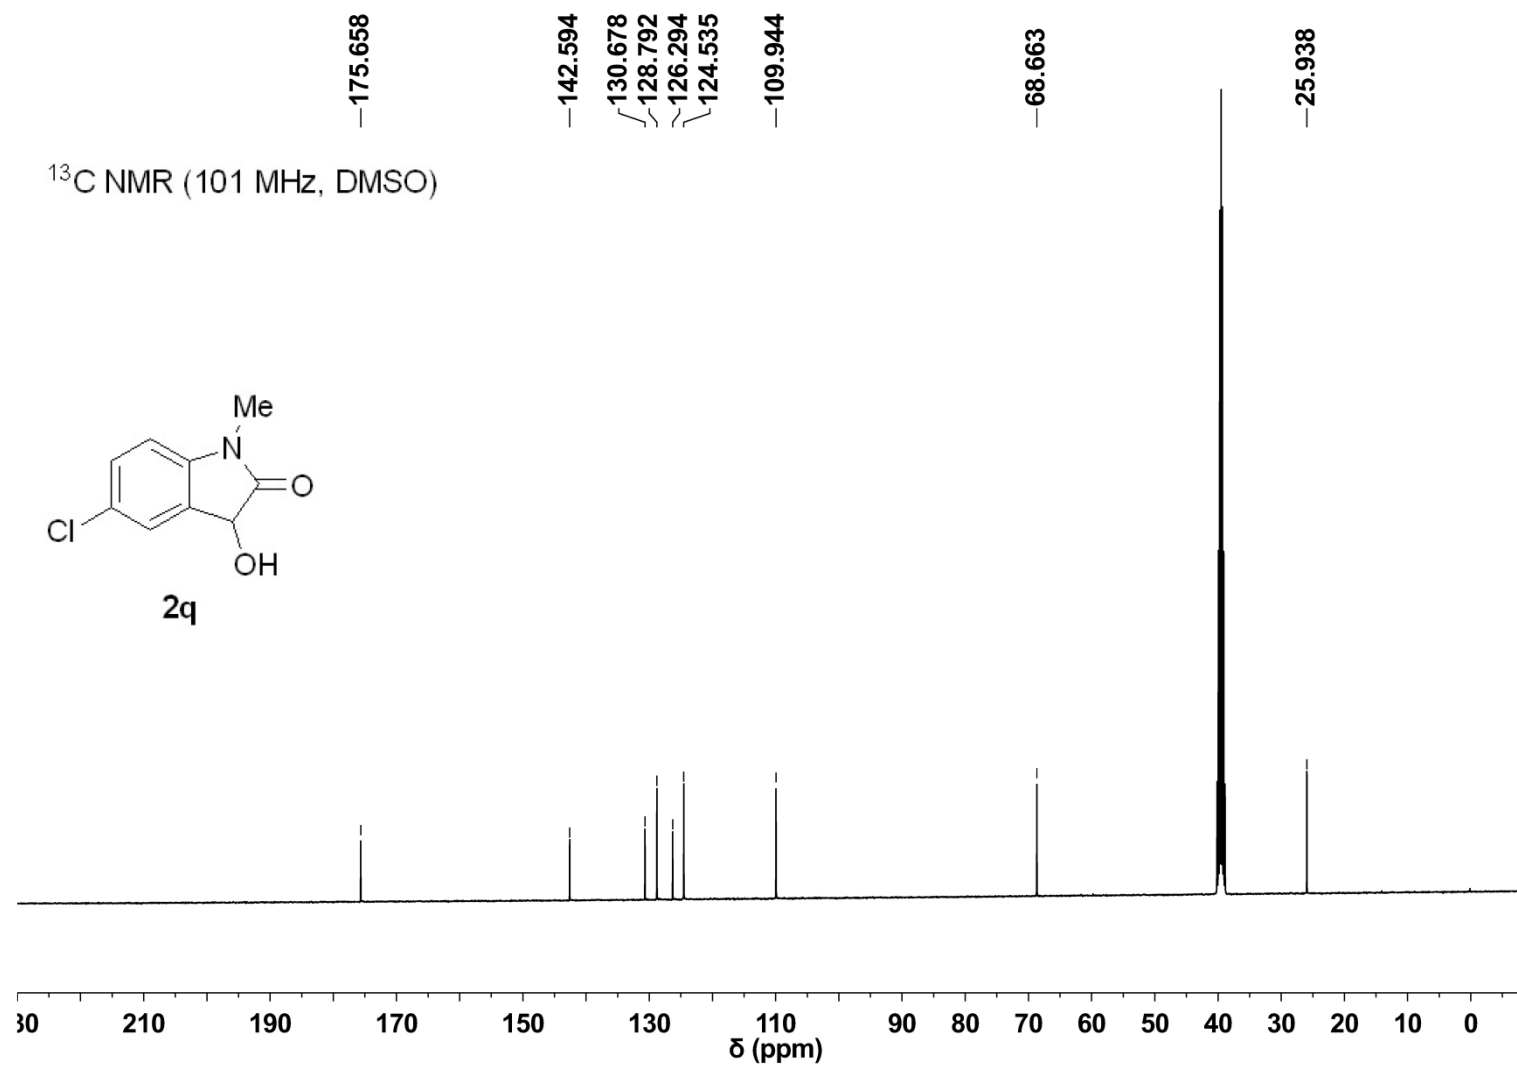



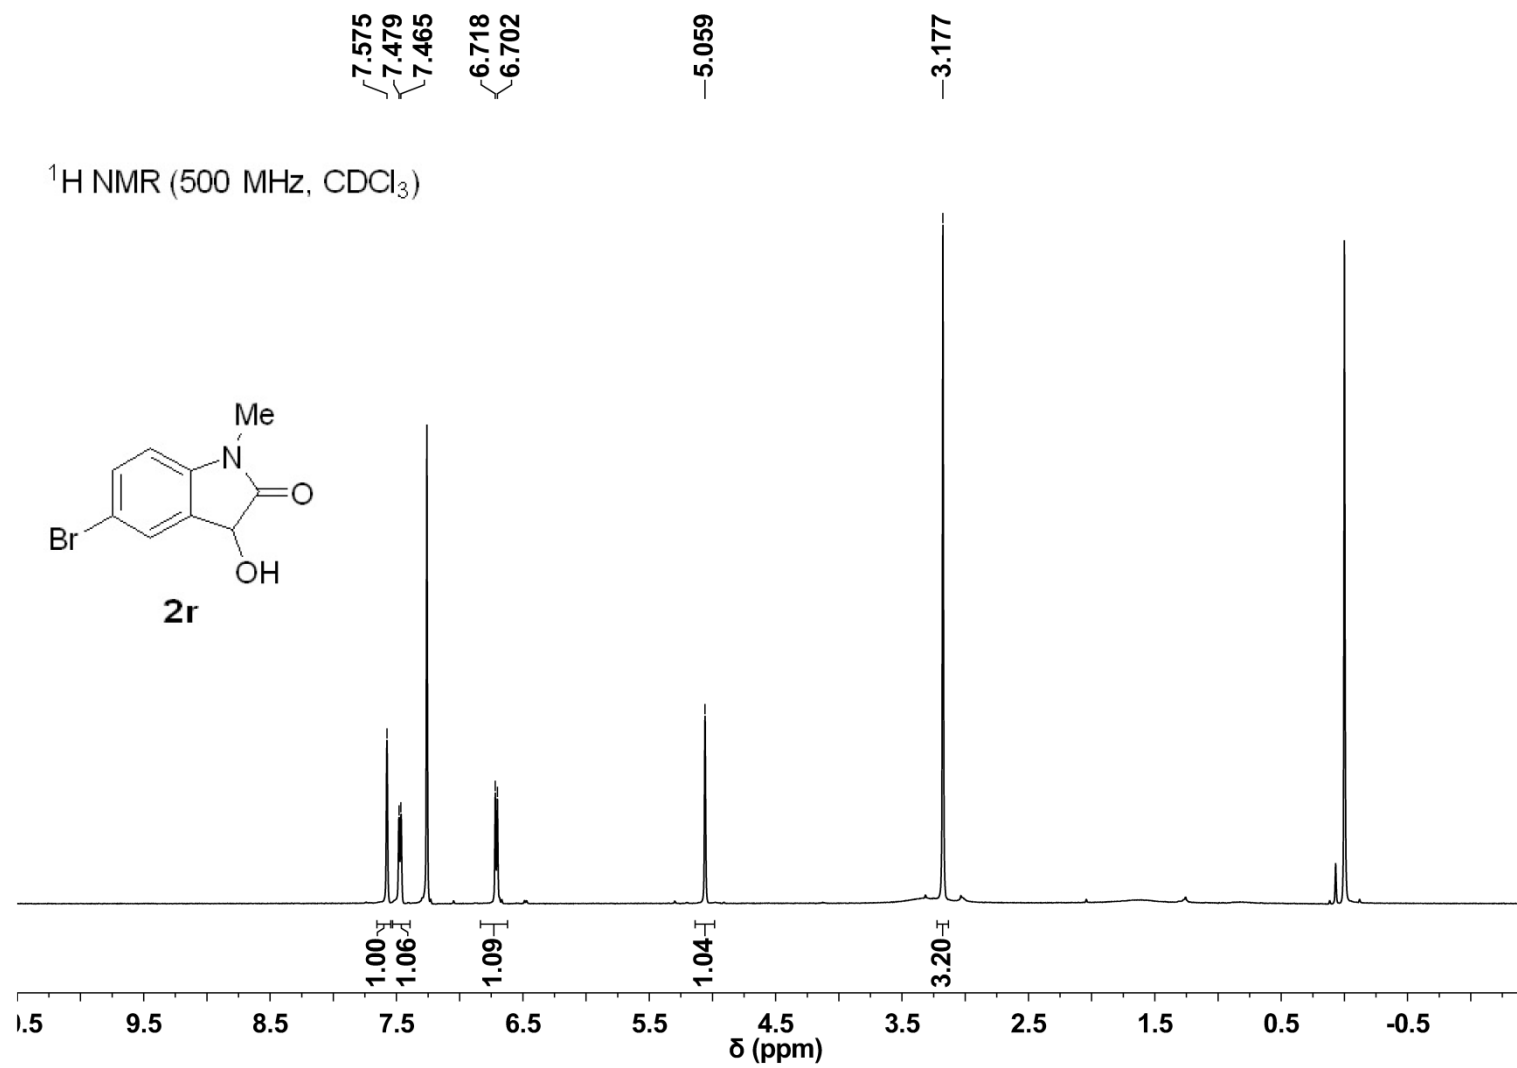

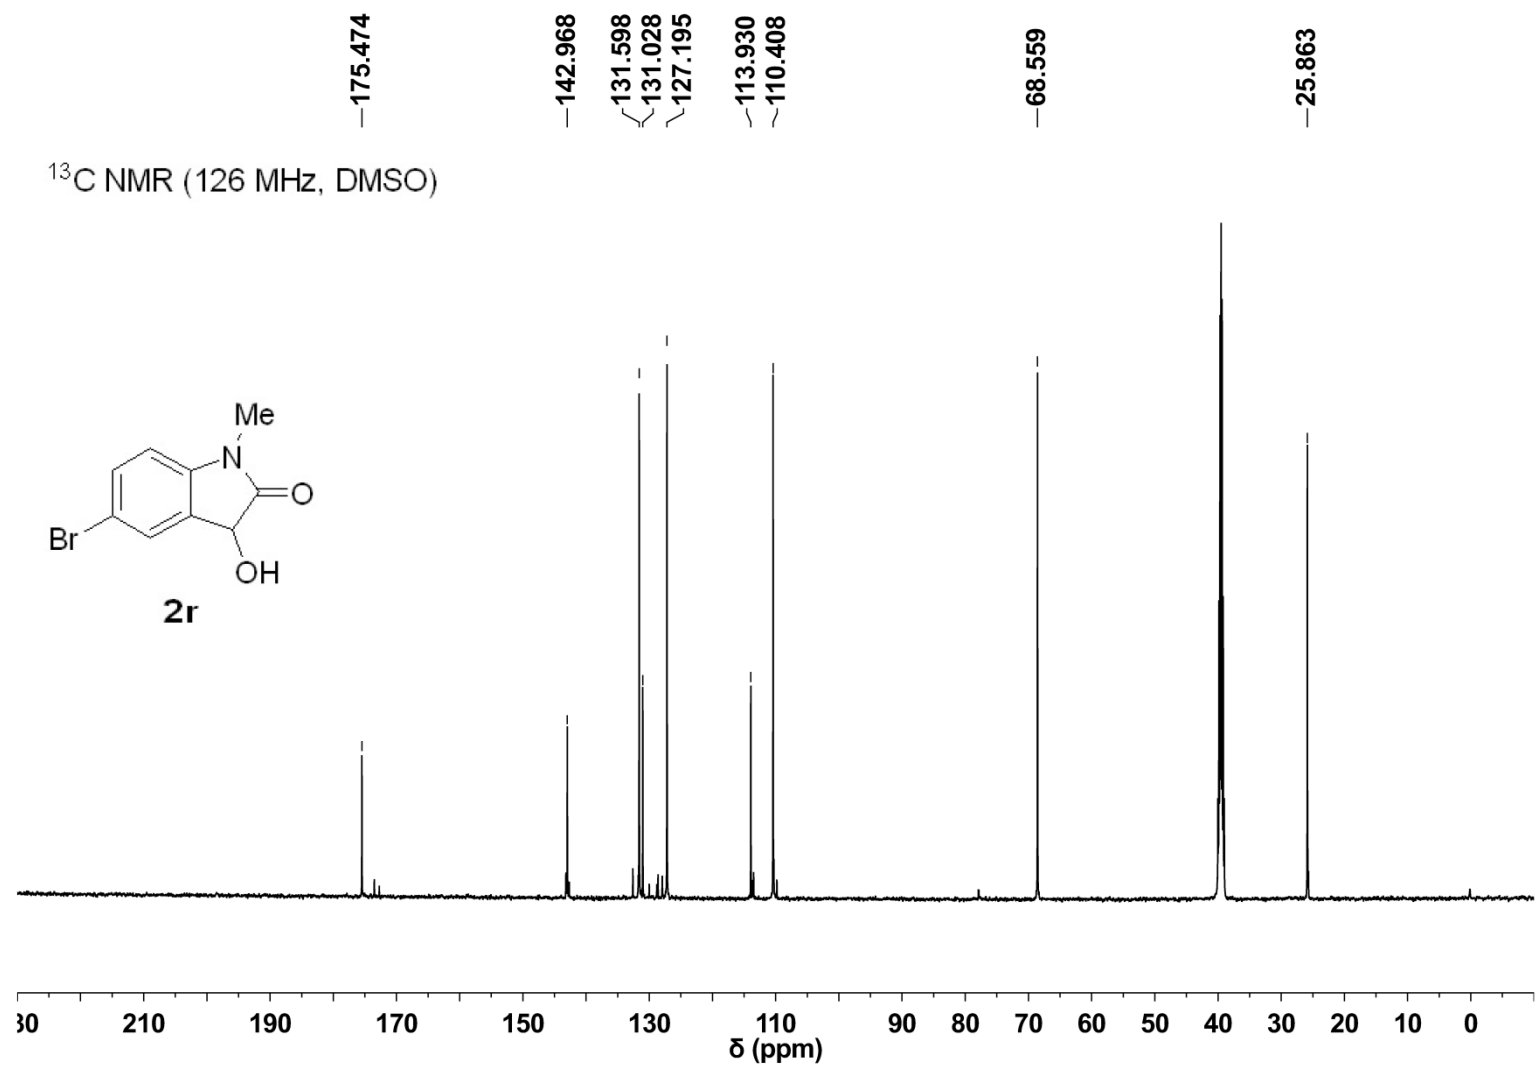

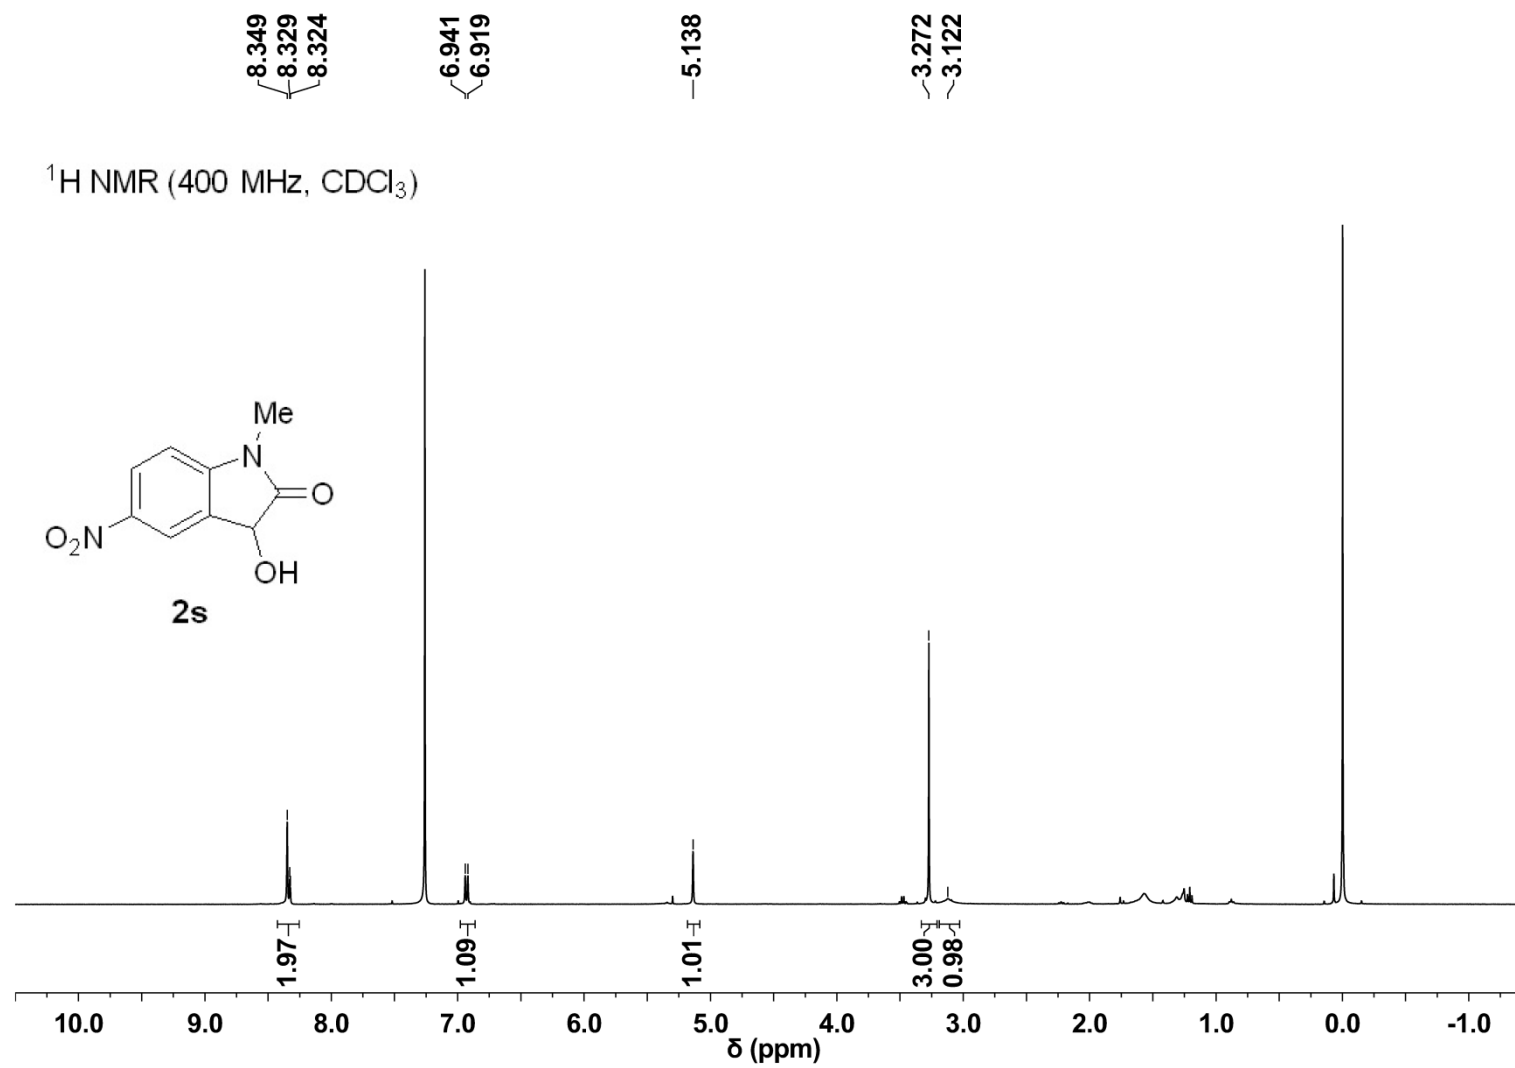

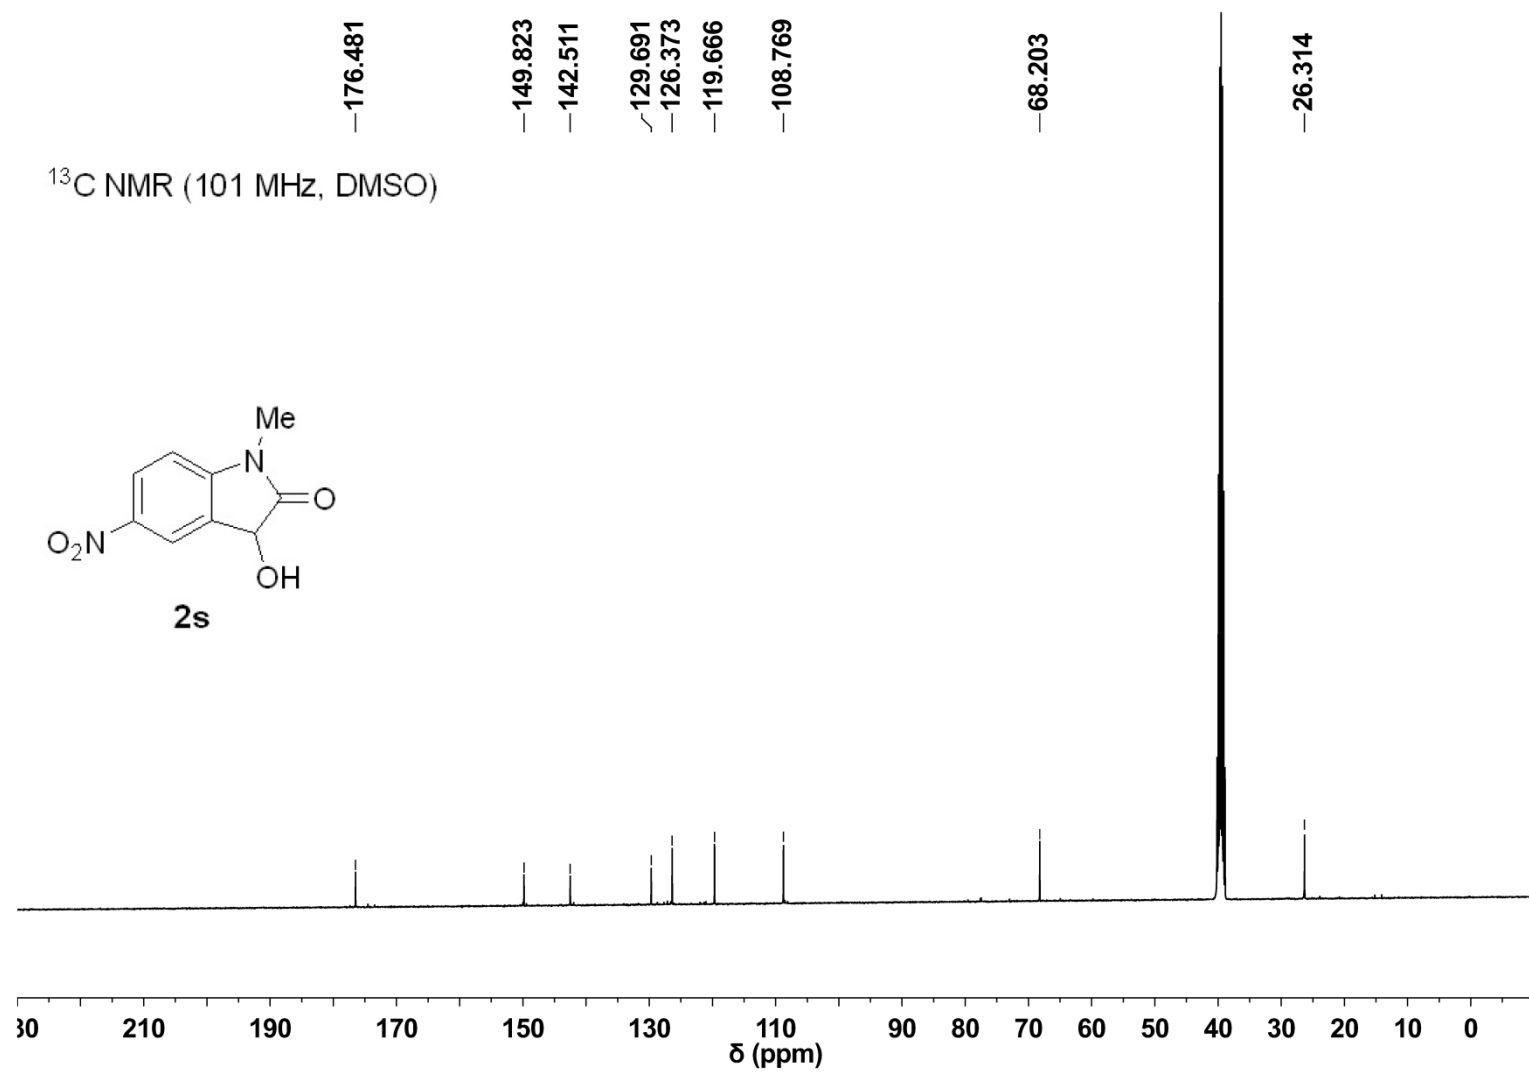

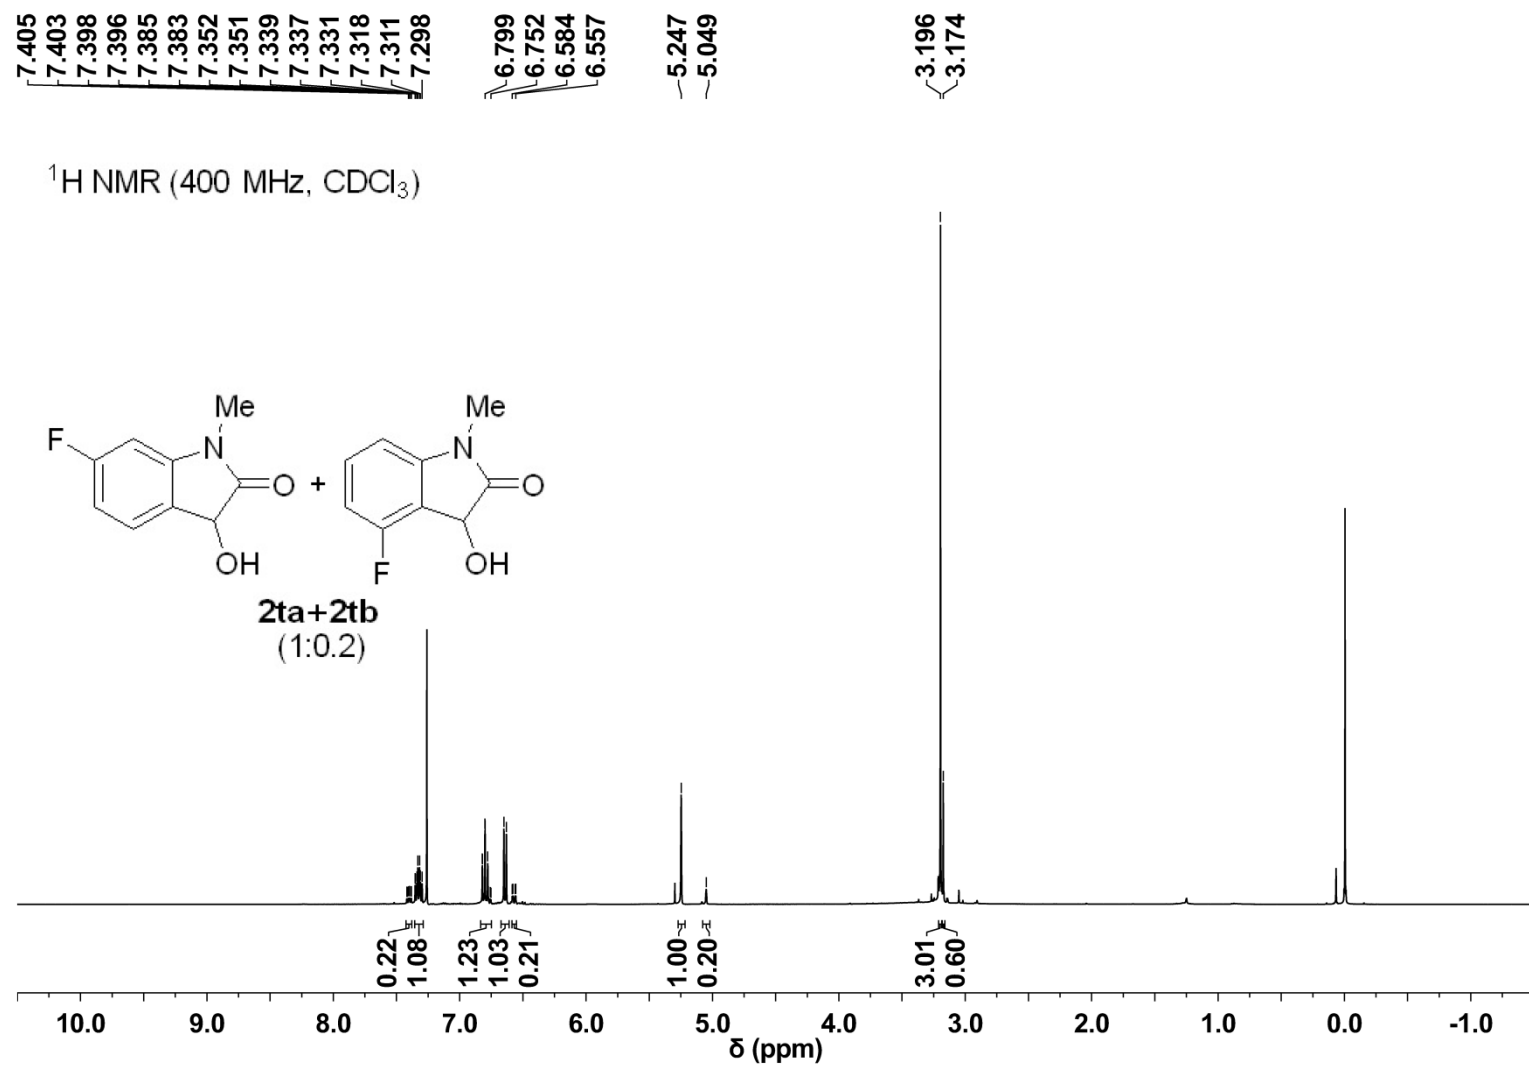

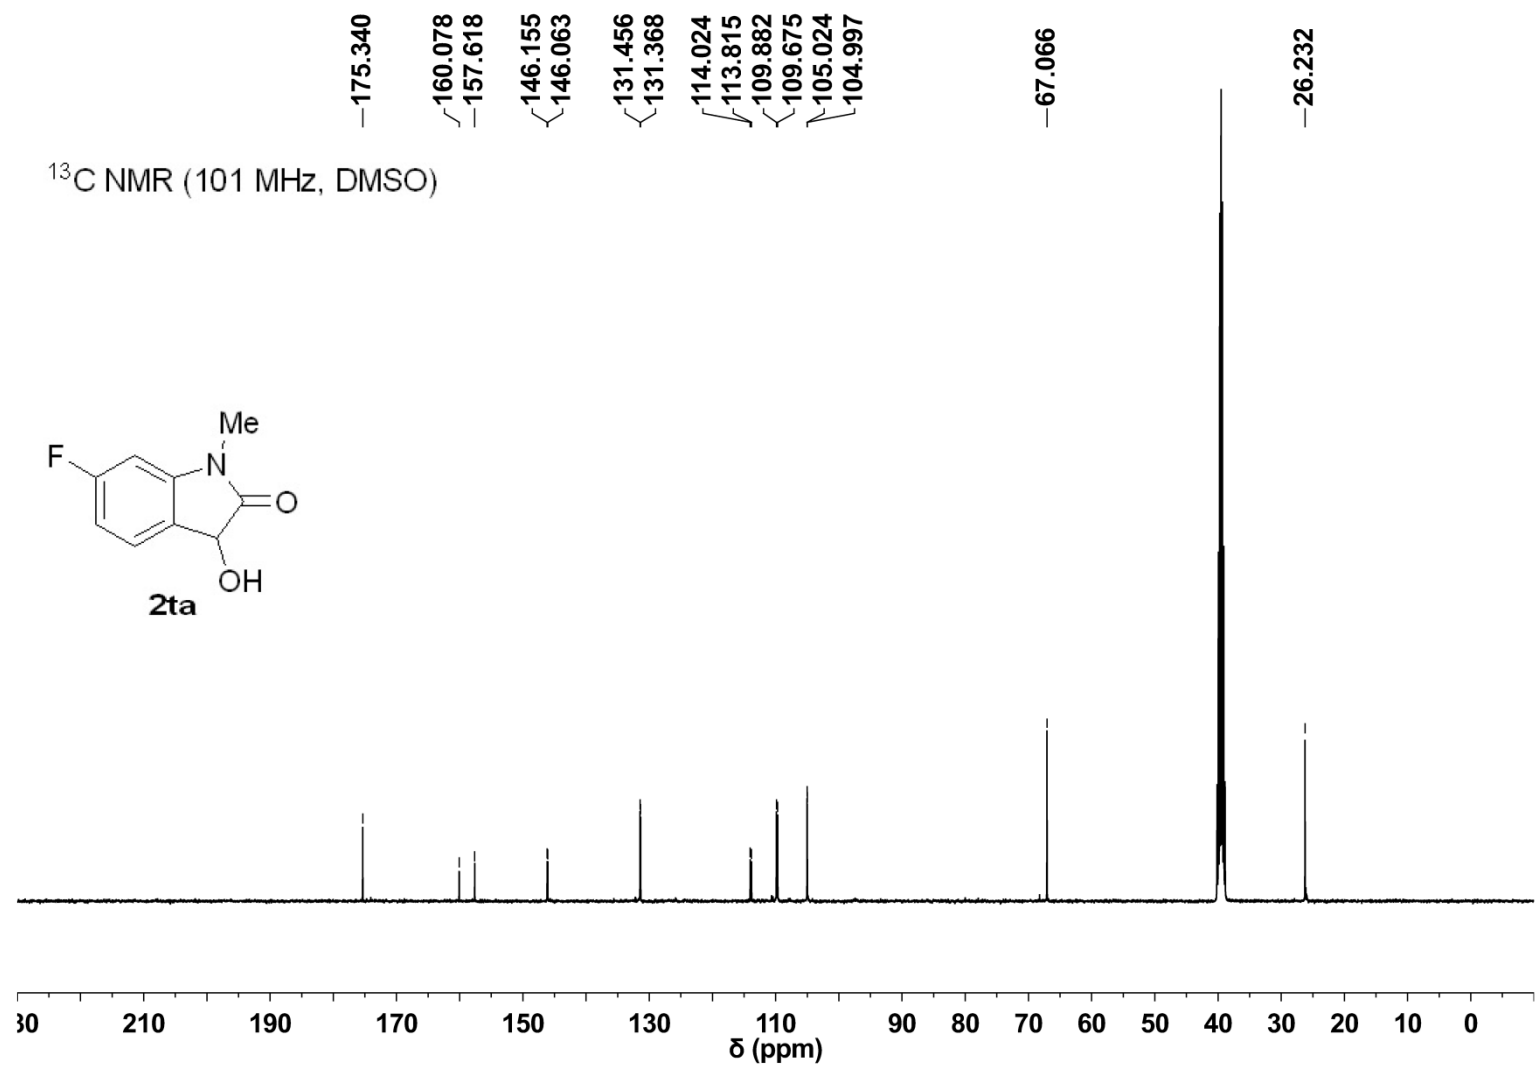

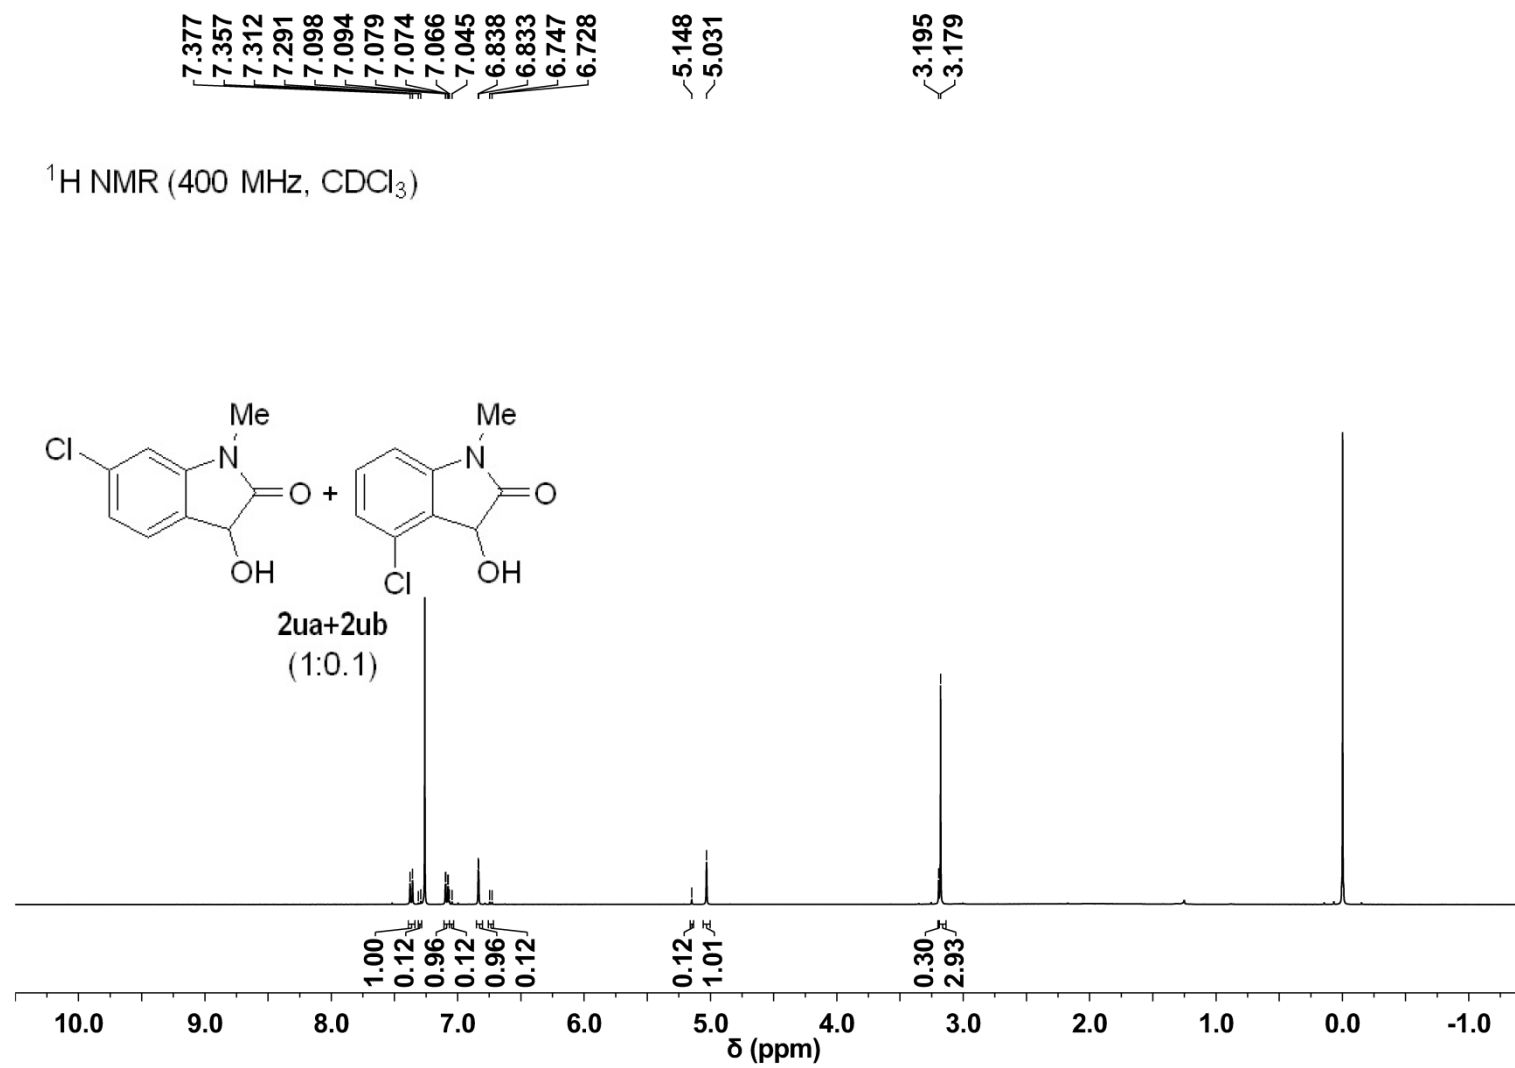

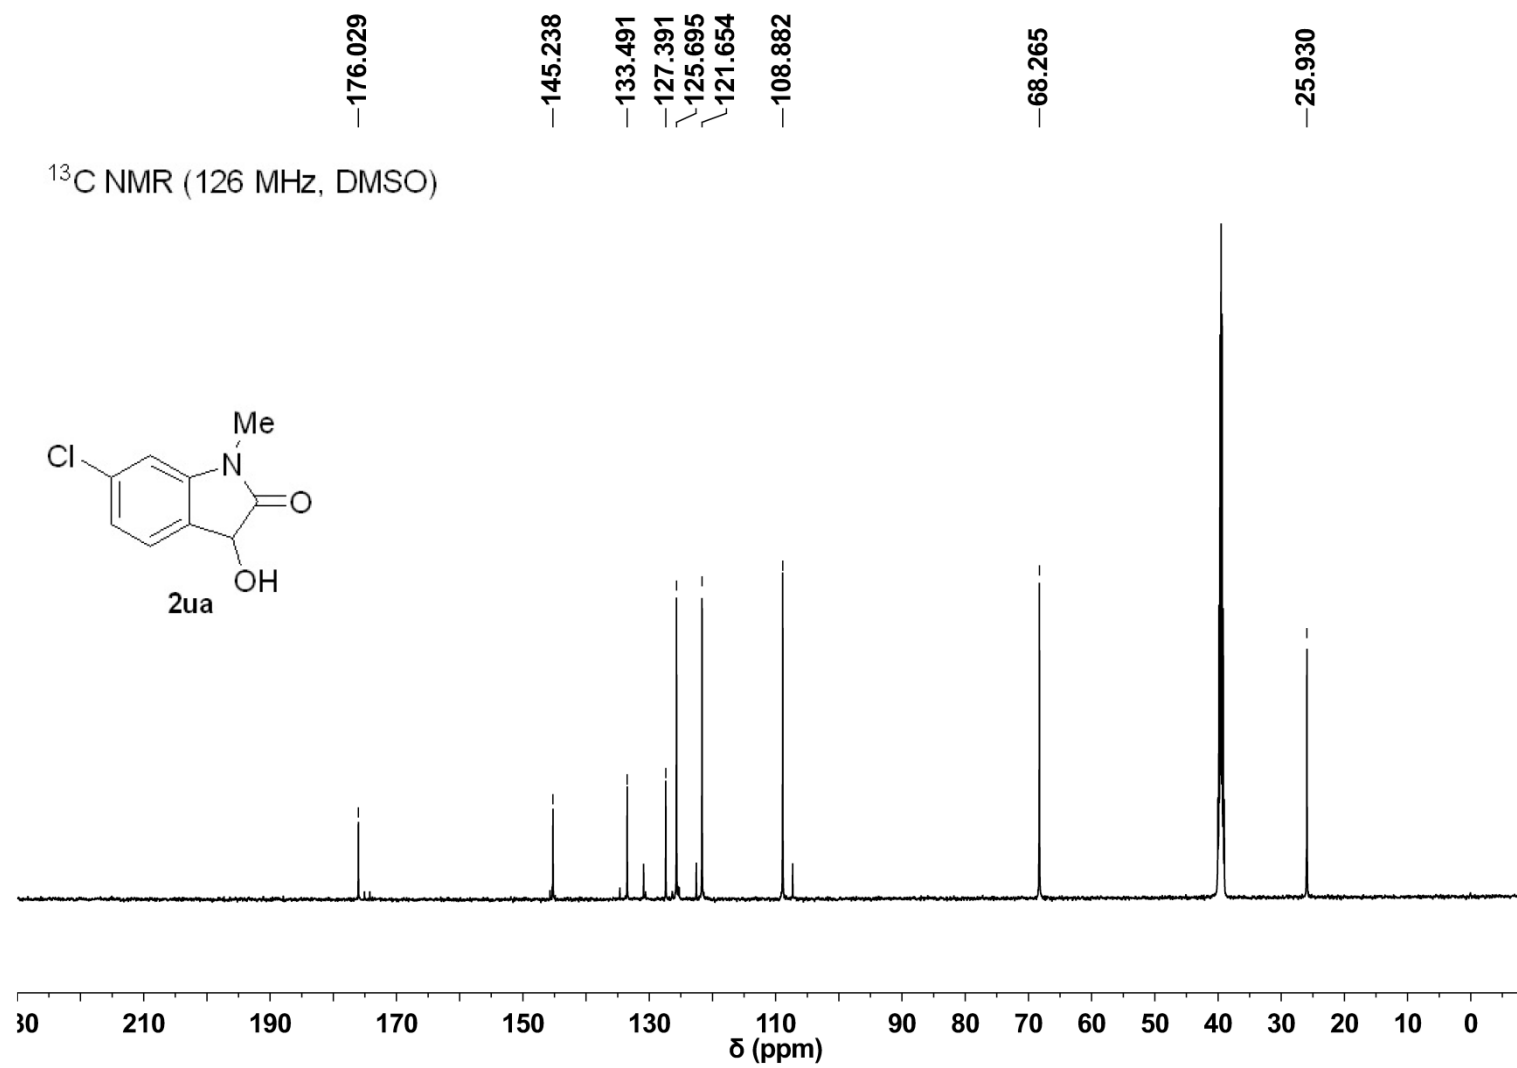



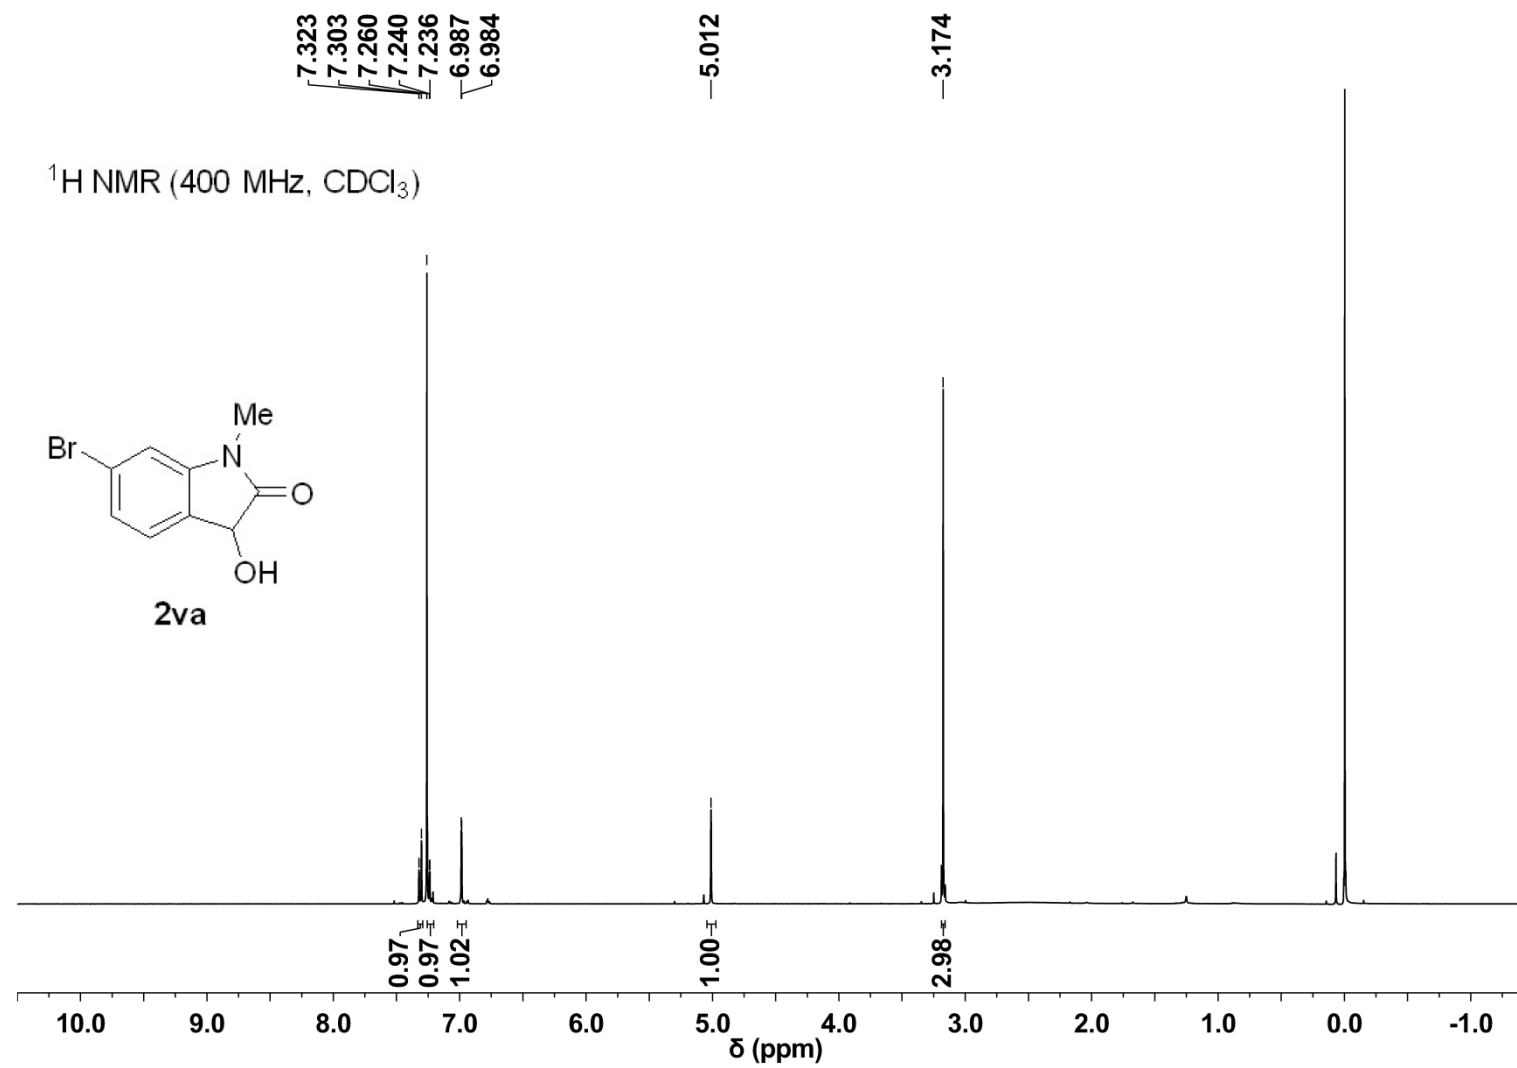

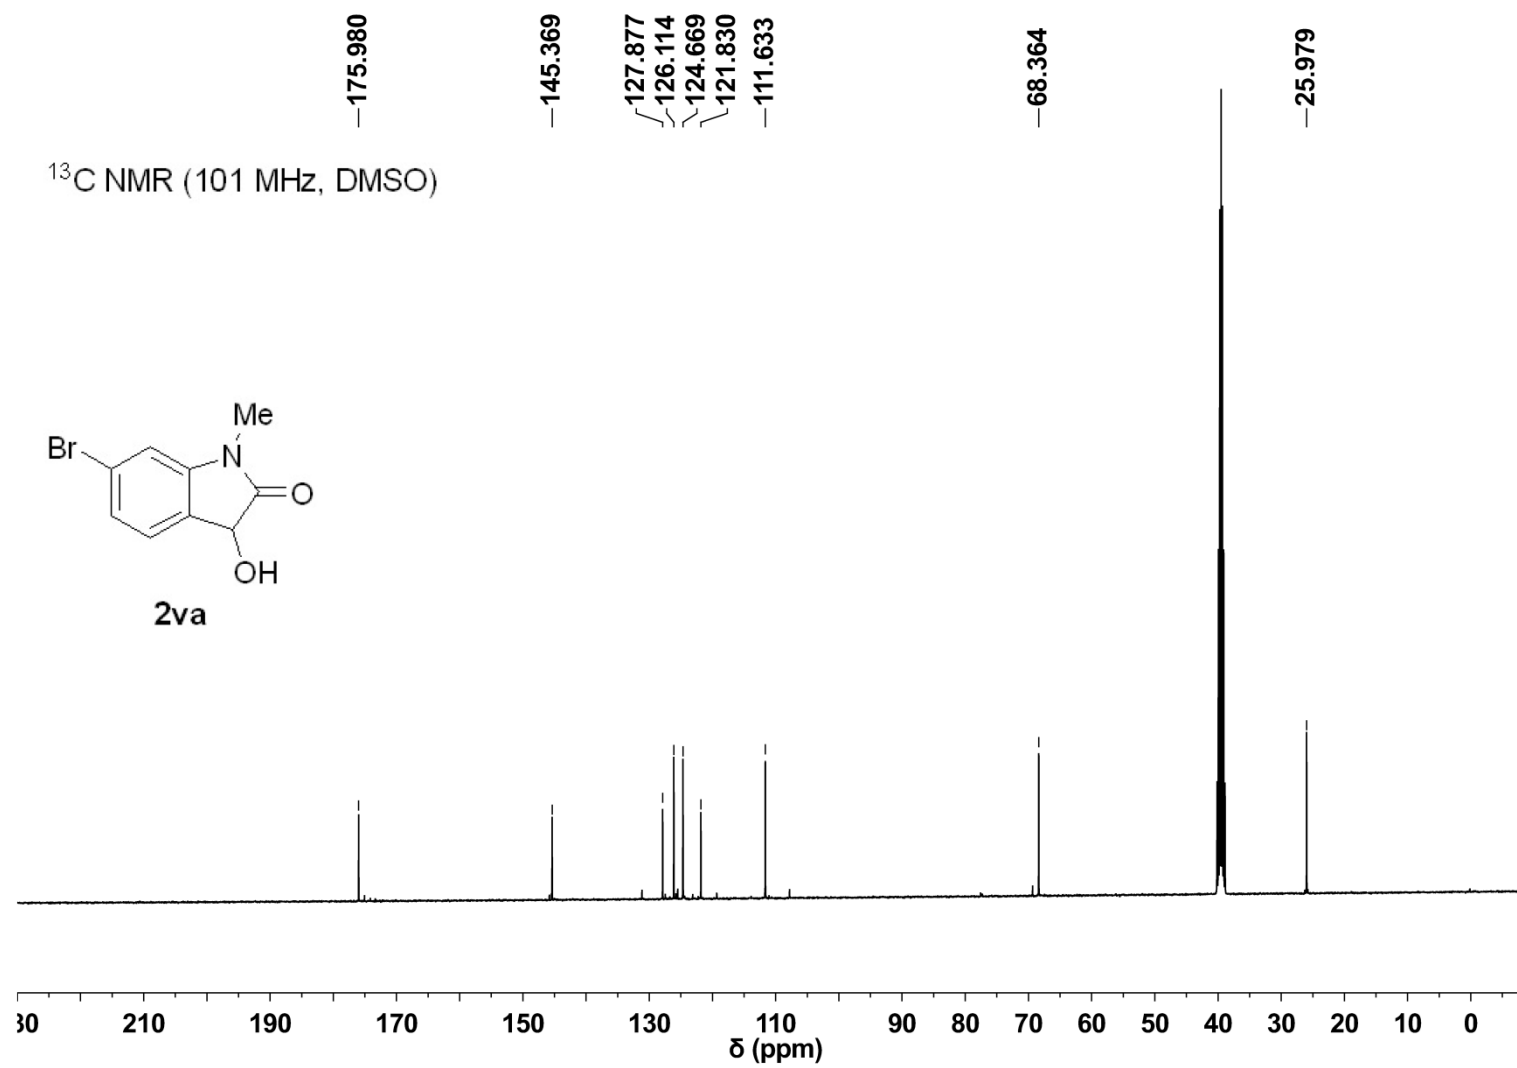

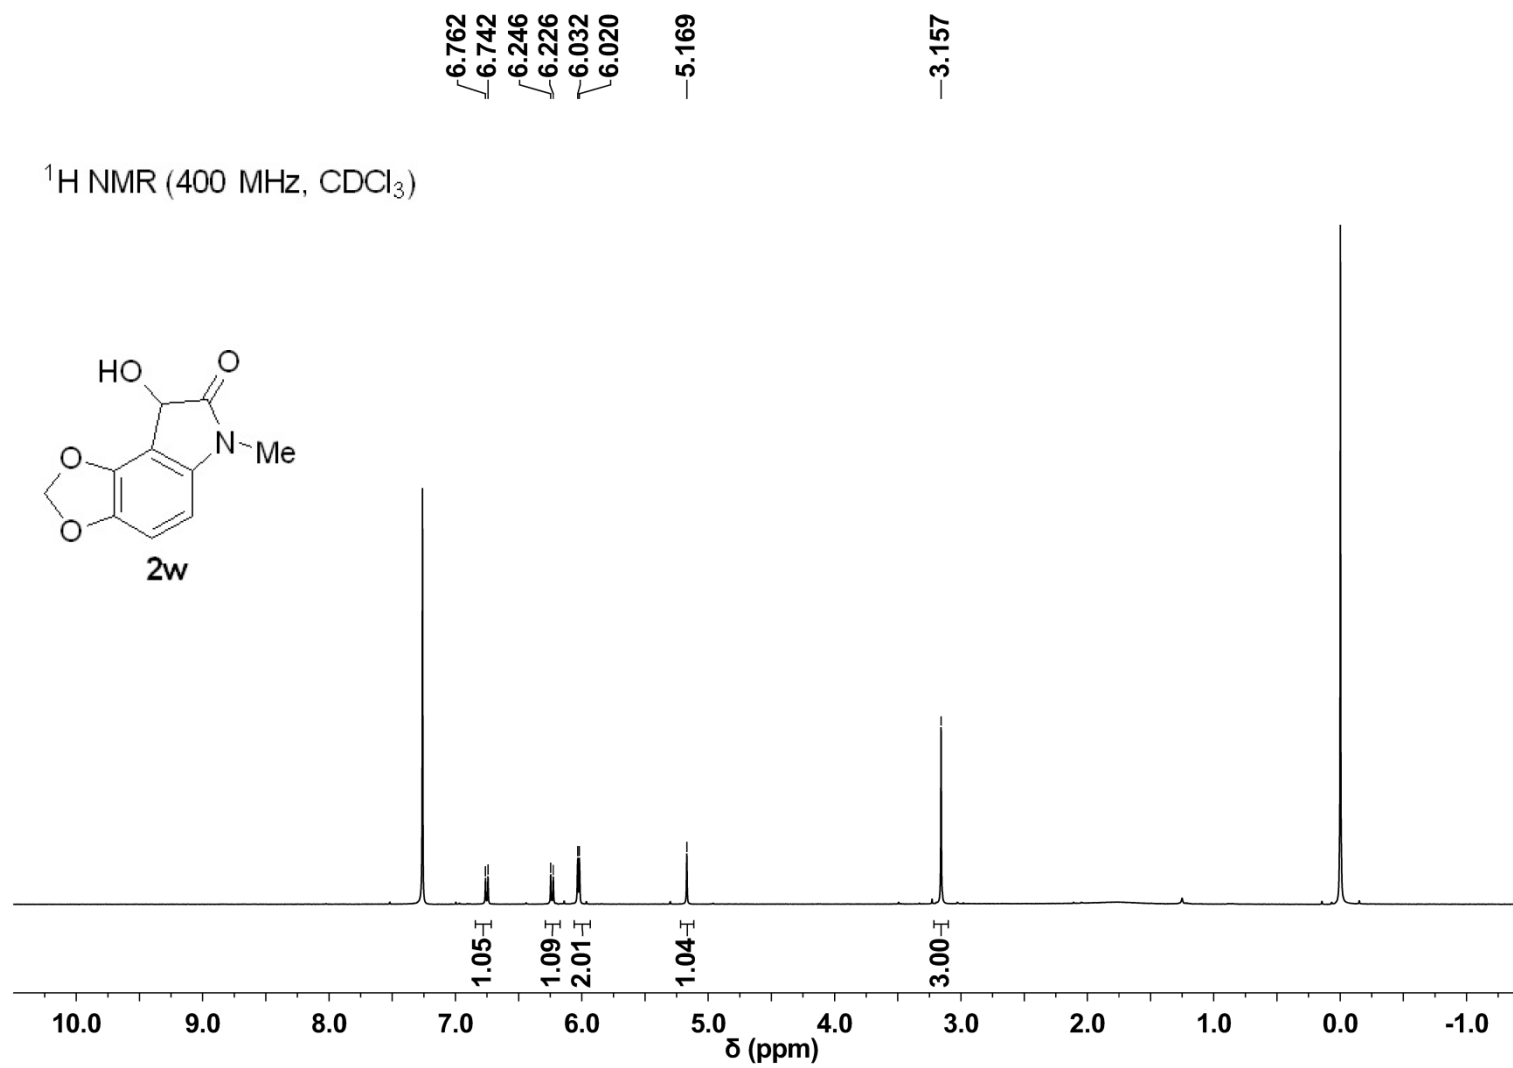

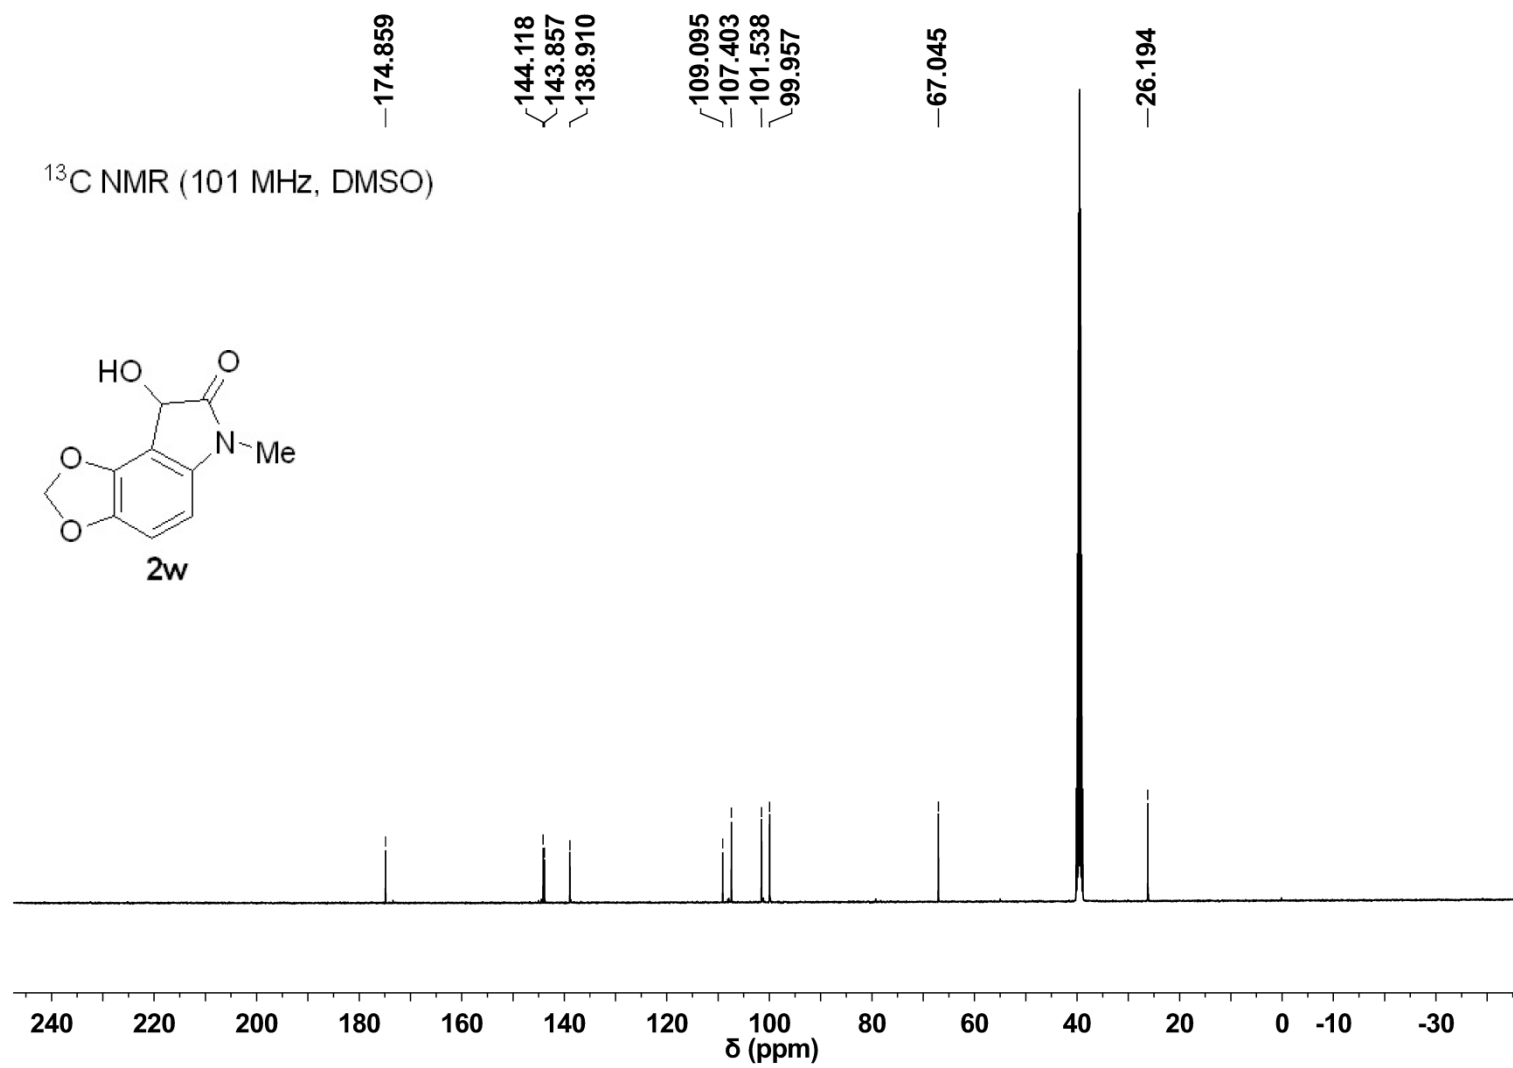

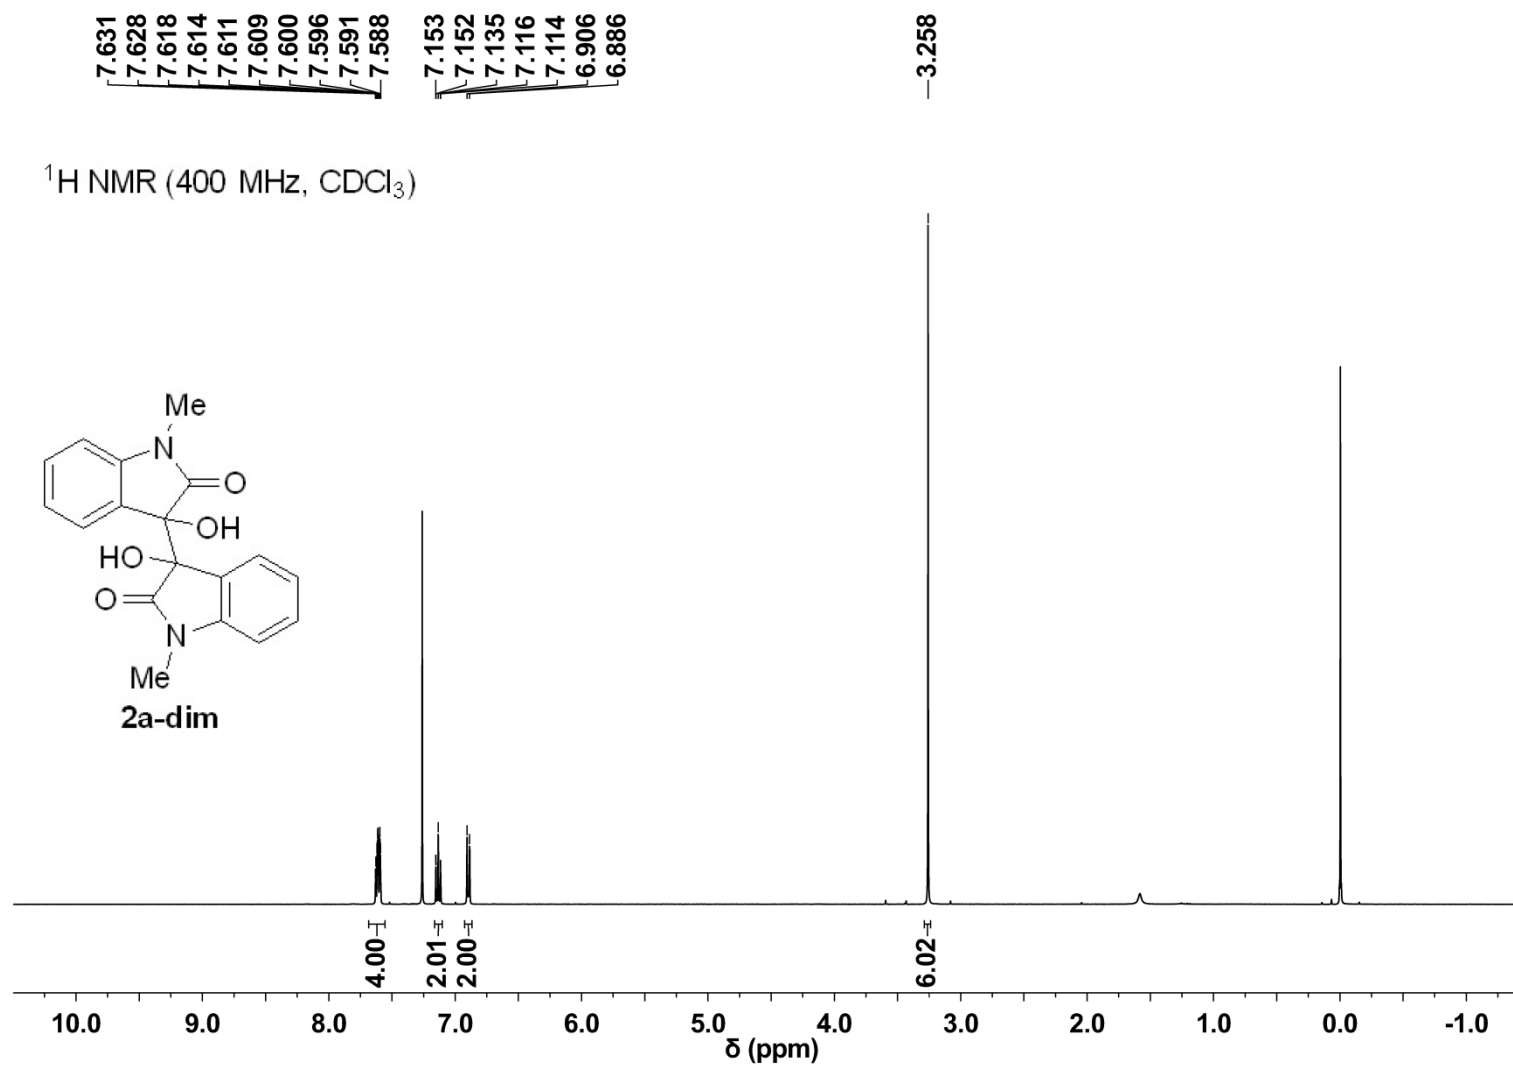

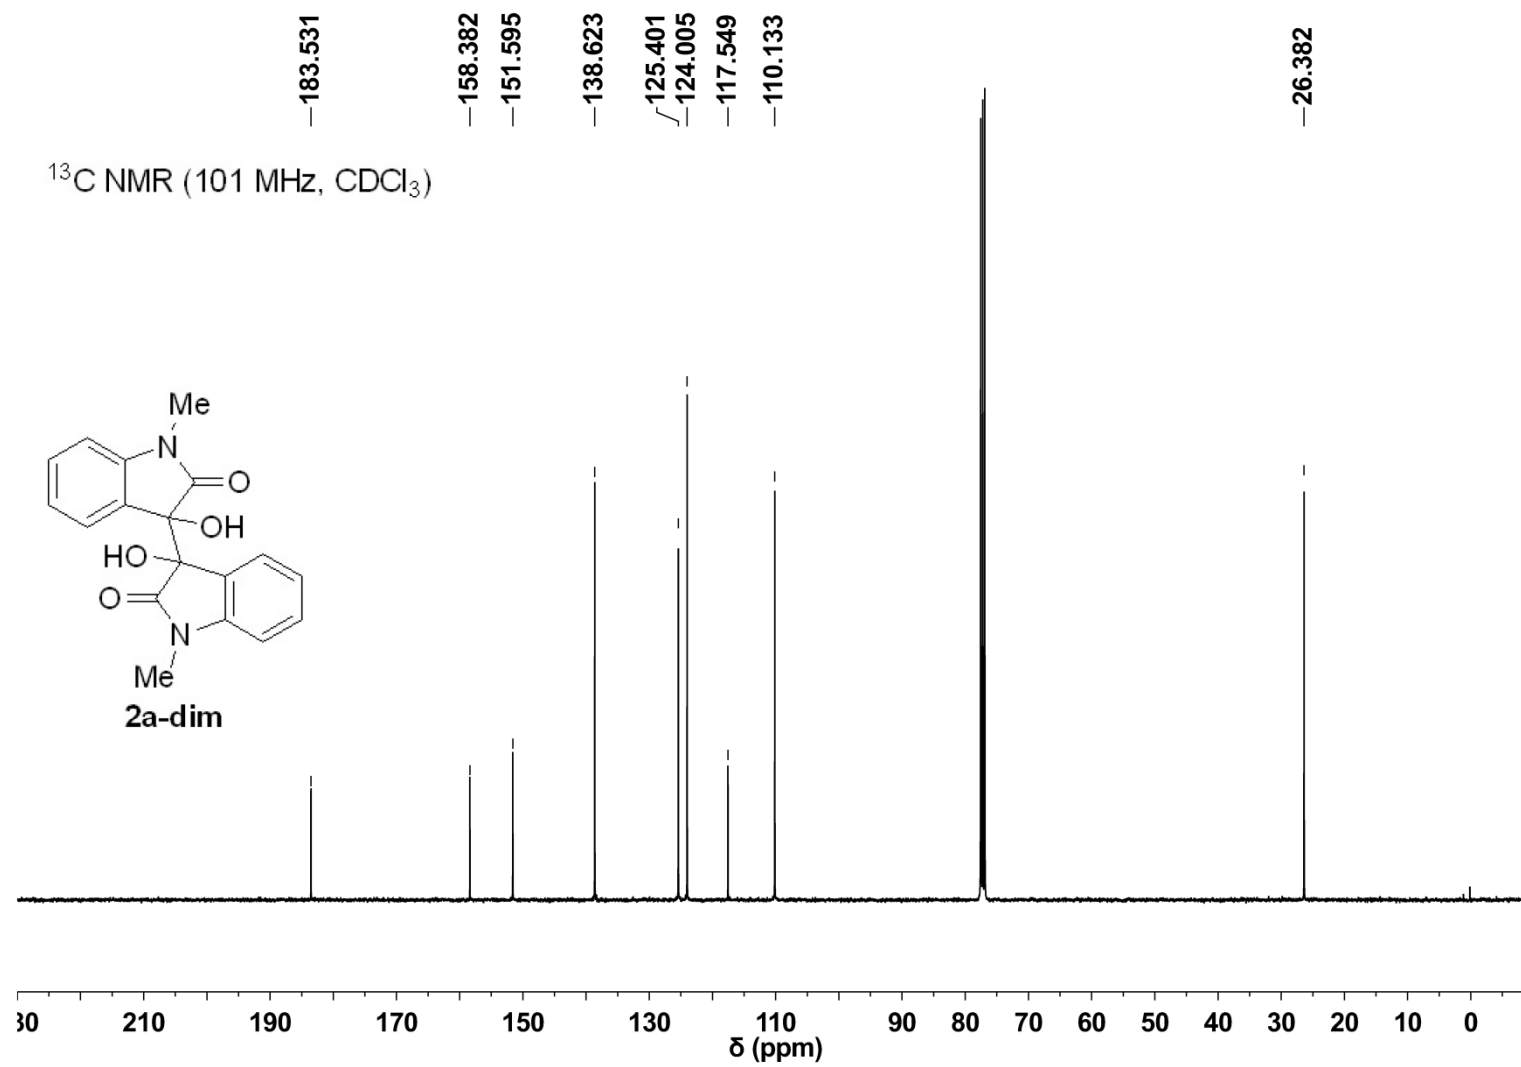

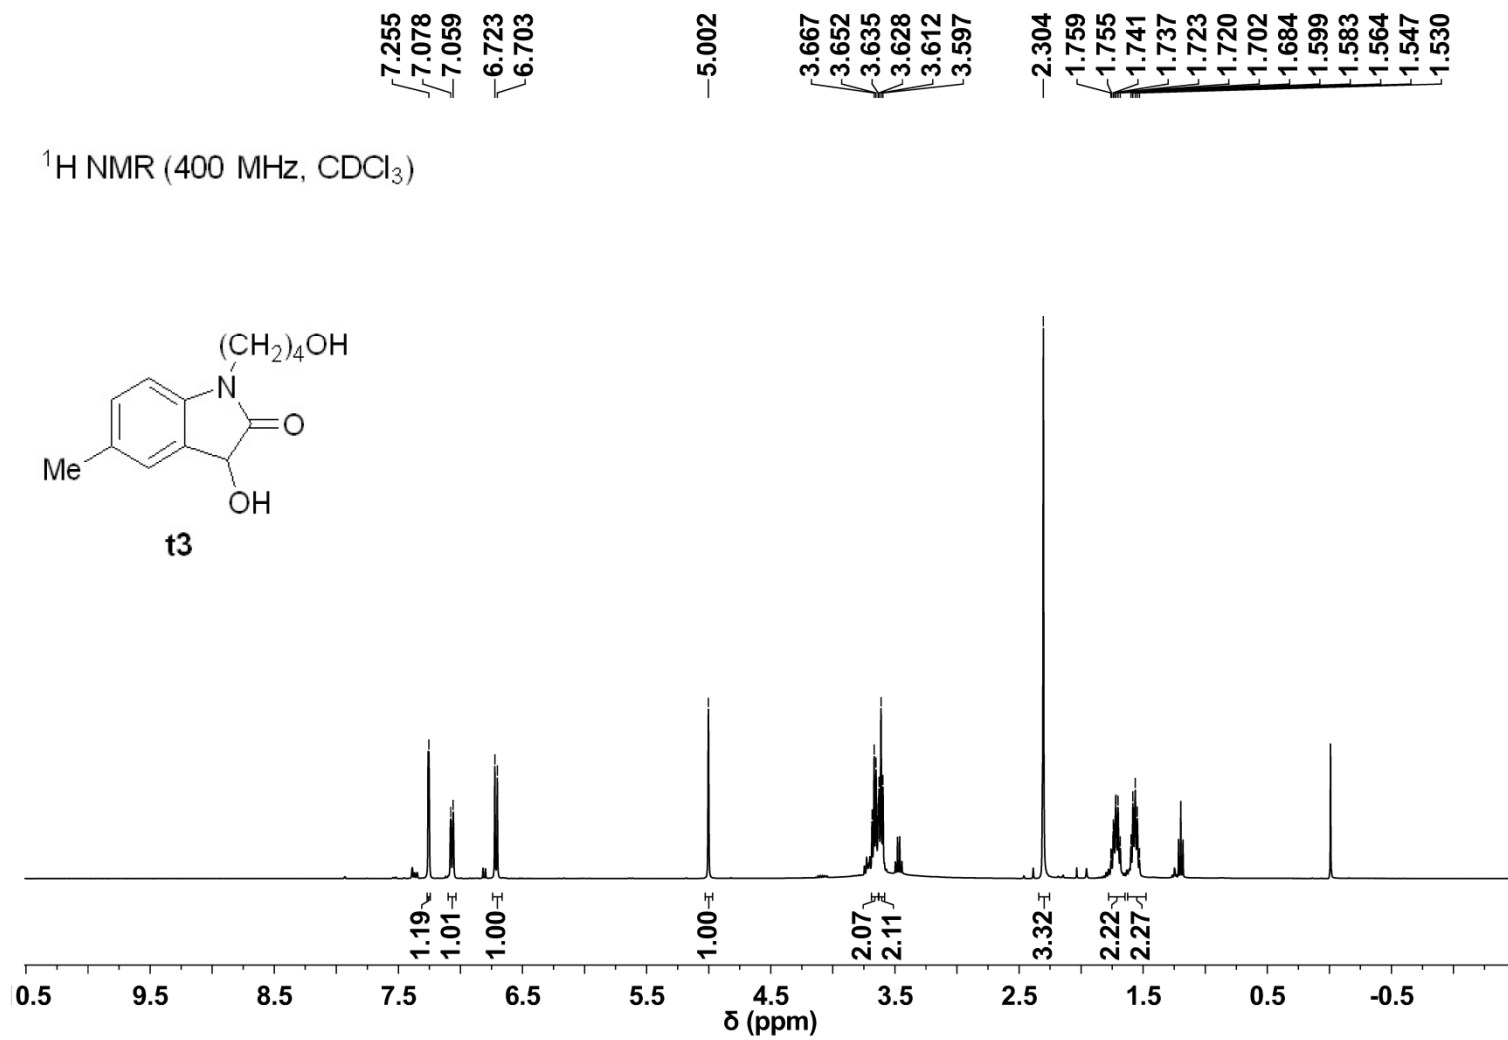

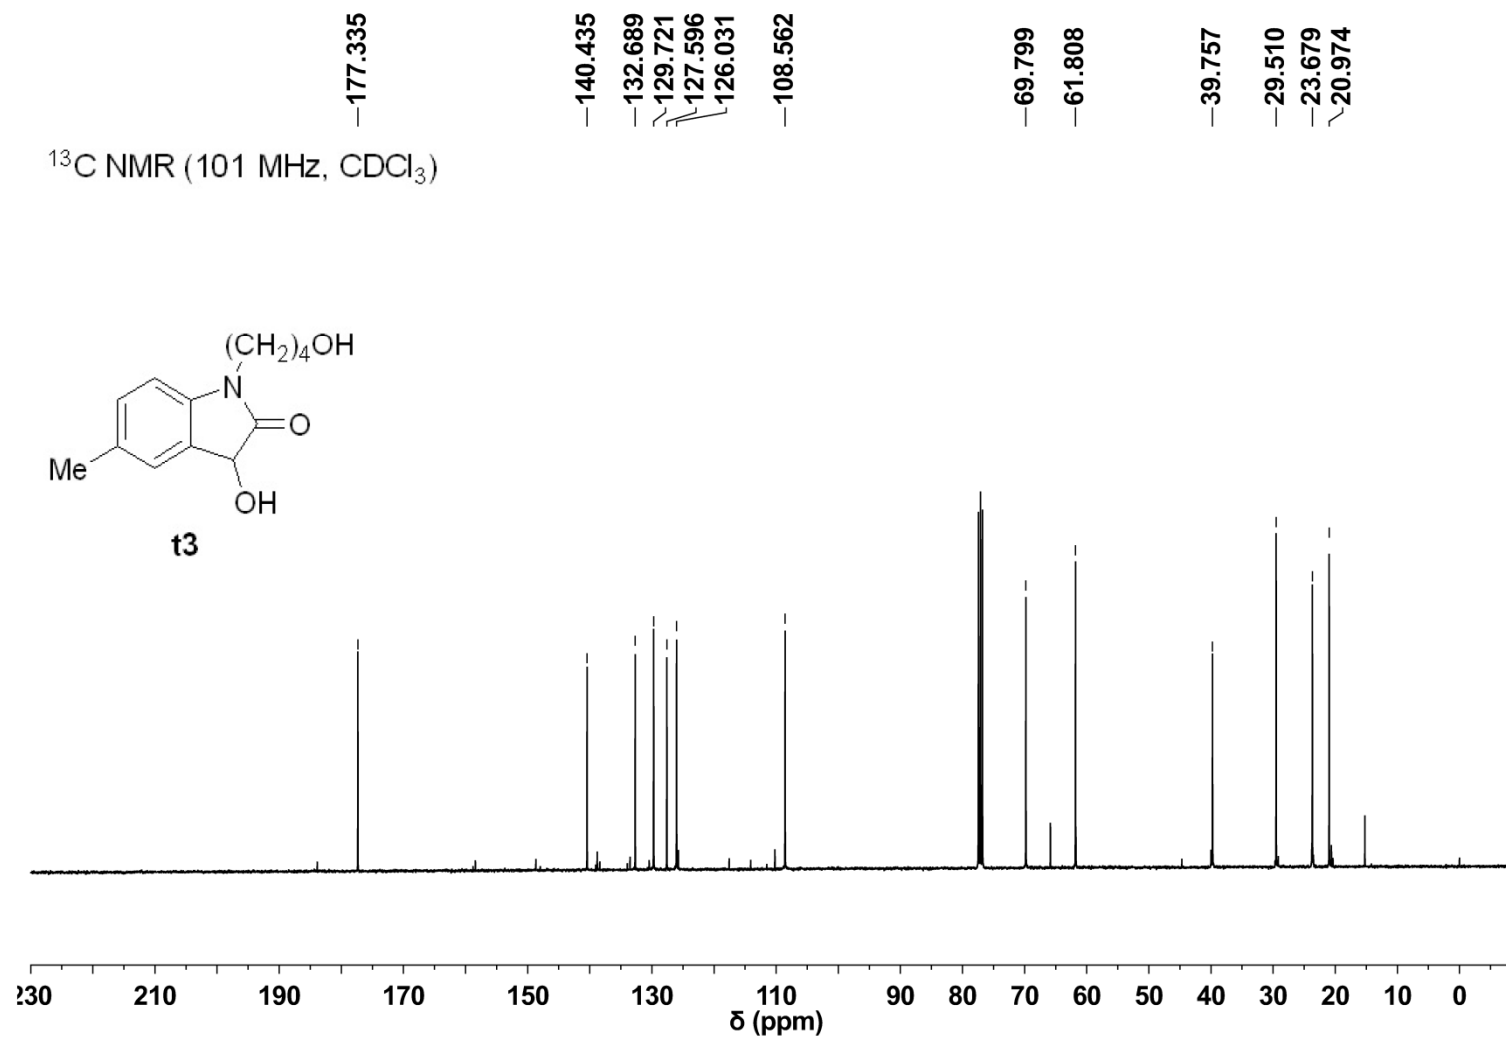



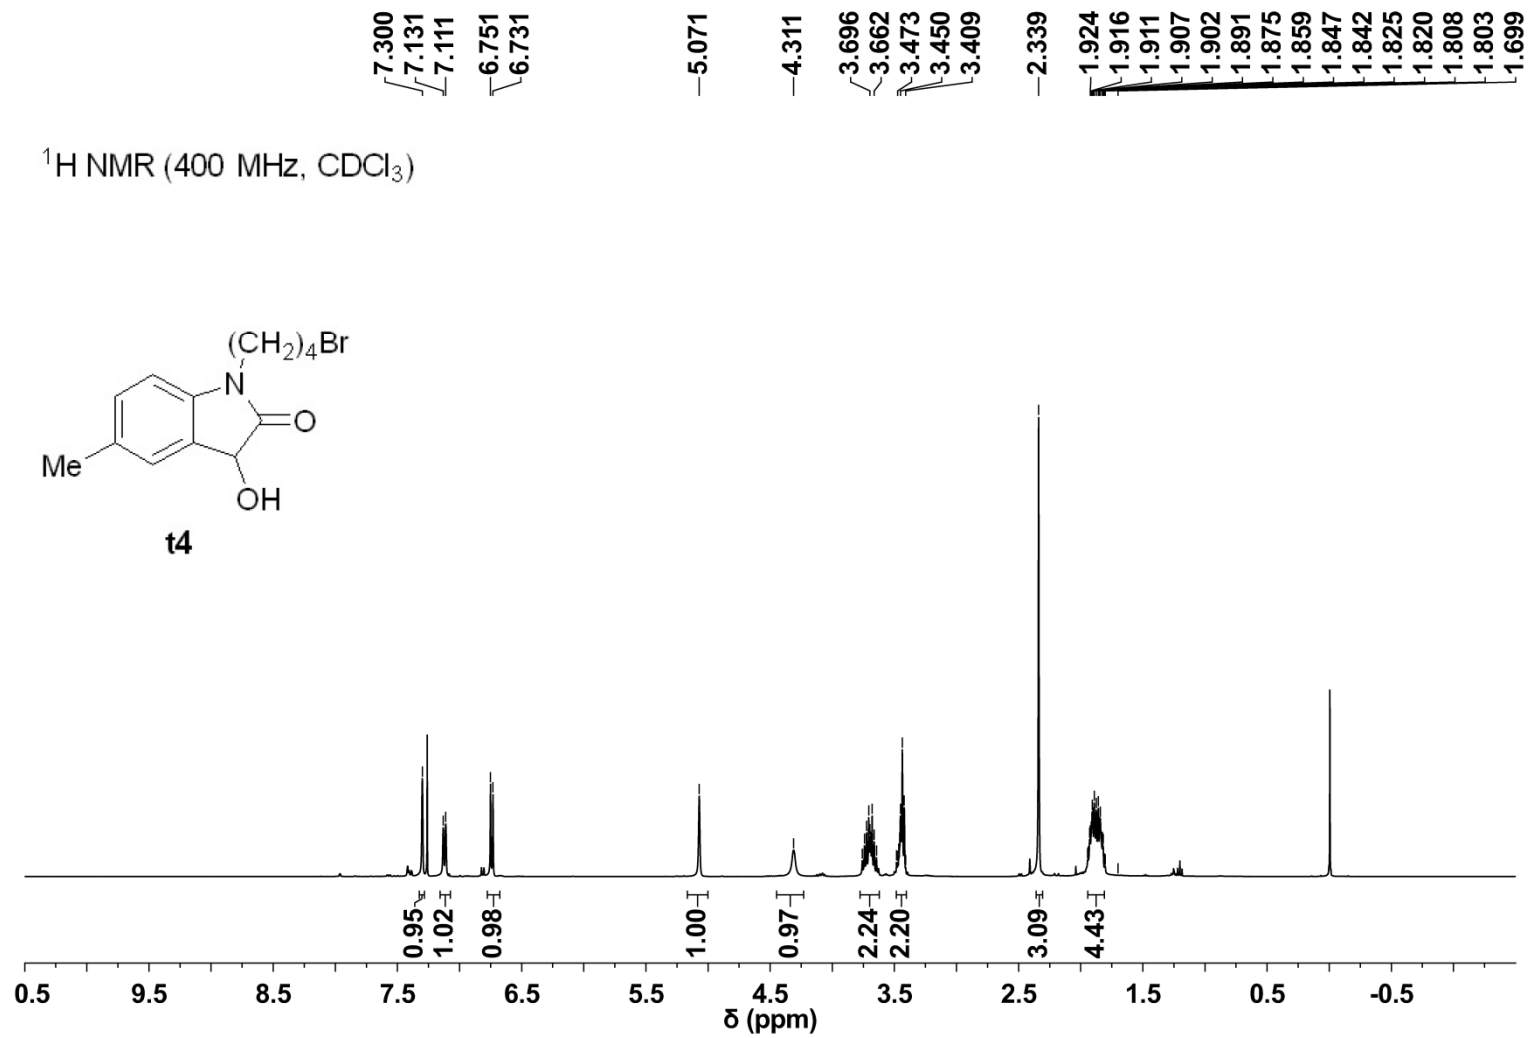

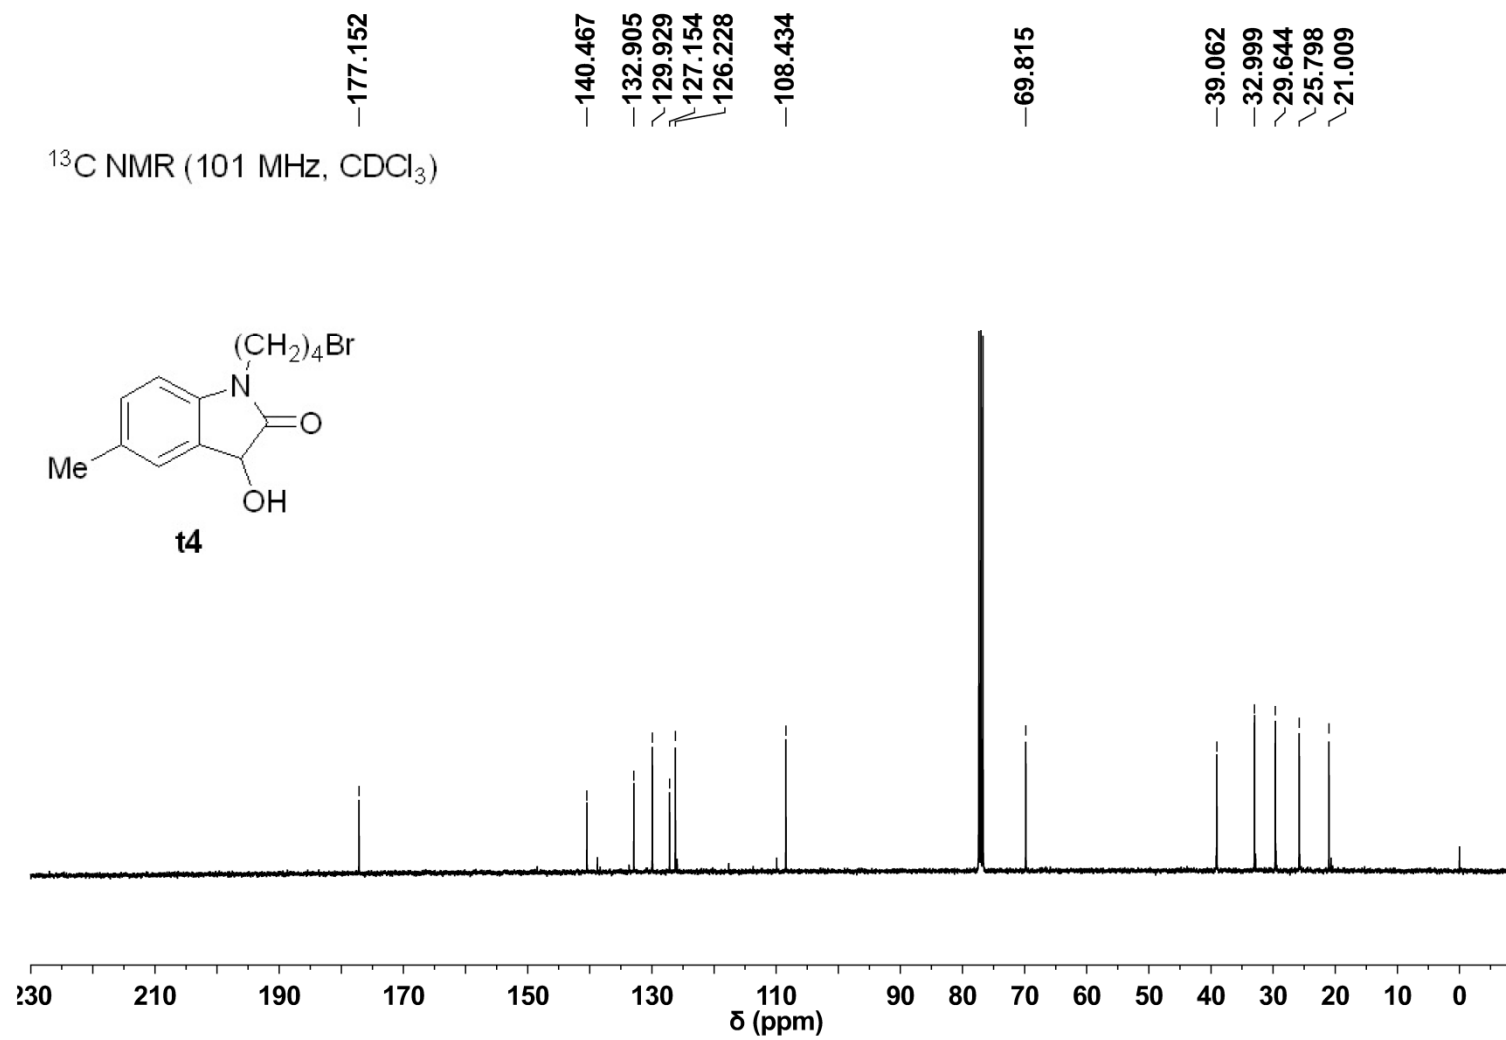

Supplement: c4ob01643b1.pdf [file c4ob01643b1.pdf]
